# Supplementary material for: DDQ/FeCl3-mediated tandem oxidative carbon–carbon bond formation for the Synthesis of indole–fluorene hybrid molecules
Source: Royal Society of Chemistry journal article supplement (doi:10.1039/d0ob00413h), 2020-12-18

## Supporting Information

### DDQ/FeCl<sub>3</sub>-mediated tandem oxidative carbon-carbon bond formation to the Synthesis of indole-fluorene hybrid

Abhishek Kar, Baitan Chakraborty, Sandip Kundal, Gopal Rana and Umasish Jana\*

<sup>a</sup>Department of Chemistry, Jadavpur University, Kolkata 700032, West Bengal, India

E-mail: [jumasish2004@yahoo.co.in](mailto:jumasish2004@yahoo.co.in).  
[umasishjana@gmail.com](mailto:umasishjana@gmail.com).

#### Table of content:

|                                                                                |       |
|--------------------------------------------------------------------------------|-------|
| 1. General information.....                                                    | 2     |
| 2. Crystal data.....                                                           | 3     |
| 3. Synthesis of (1a-1o).....                                                   | 4     |
| 4. Synthesis of (2a-2e).....                                                   | 4-6   |
| 5. Synthesis of (2f-2j).....                                                   | 7-9   |
| 6. Synthesis of (2k-2o).....                                                   | 9-11  |
| 7. Synthesis of (3a-3f).....                                                   | 12-13 |
| 8. Synthesis of (3g-3l).....                                                   | 14-15 |
| 9. Synthesis of (3m-3o).....                                                   | 16    |
| 10. NMR data of 3-indolyl ketone and crystal structure of the compound 3a..... | 17    |
| 11. <sup>1</sup> H and <sup>13</sup> C NMR spectra scan.....                   | 18-52 |

**General:** All  $^1\text{H}$  NMR spectral data were recorded by Bruker 300, 400, 500 (300, 400, 500 MHz) spectrometer in  $\text{CDCl}_3$  solutions expressing chemical shifts in parts per million (ppm,  $\delta$ ) and are referenced to  $\text{CHCl}_3$  ( $\delta = 7.26$  ppm) as an internal standard. All coupling constants are absolute values and are expressed in Hz. The description of the signals include: s = singlet, d = doublet, t = triplet, m = multiplet, dd = doublet of doublets and brs = broad singlet. td = triplet of doublet.  $^{13}\text{C}$  NMR spectra were recorded with a Bruker 300, 400, 500 (75, 100, 125 respectively MHz) spectrometer as solutions in  $\text{CDCl}_3$  with complete proton decoupling. Chemical shifts are expressed in parts per million (ppm,  $\delta$ ) and are referenced to  $\text{CDCl}_3$  ( $\delta = 77.0$  ppm) as an internal standard. High-Resolution Mass Spectra (HRMS) were performed with a Qtof Micro YA263 spectrometer in trichloromethane solvent. The molecular fragments are quoted as the relation between mass and charge ( $m/z$ ). The routine monitoring of reactions was performed with silica gel coated glass slides (Merck, silica gel G for TLC), and pre-coated Al plate, which were analyzed with iodine and uv light respectively. Solvents, reagents and chemicals were purchased from Aldrich, Fluka, Merck, SRL, Spectrochem and Process Chemicals. All reactions involving moisture sensitive reactants were executed with oven-dried glassware.

**Table for crystallographic data and structural refinement parameters for 3a**

|                                    |                                                   |
|------------------------------------|---------------------------------------------------|
| Empirical formula                  | C <sub>28</sub> H <sub>21</sub> NO <sub>2</sub> S |
| Formula weight                     | 435.52                                            |
| Temperature/K                      | 293                                               |
| Crystal system                     | monoclinic                                        |
| Space group                        | 'P 21/n'                                          |
| a/Å                                | 9.730(2)                                          |
| b/Å                                | 20.980(4)                                         |
| c/Å                                | 11.450(2)                                         |
| α/°                                | 90                                                |
| β/°                                | 104.39(3)                                         |
| γ/°                                | 90                                                |
| Volume/Å <sup>3</sup>              | 2264.0(8)                                         |
| Z                                  | 4                                                 |
| ρ <sub>calc</sub> /cm <sup>3</sup> | 1.278                                             |
| μ/mm <sup>-1</sup>                 | 0.168                                             |
| F(000)                             | 912                                               |
| Crystal size/mm <sup>3</sup>       | .4 × .25 × .1                                     |
| Radiation                          | Mo Kα (λ = 0.71073)                               |
| θ range/°                          | 1.94 to 27.46                                     |
| Index ranges                       | -12 ≤ h ≤ 12, -27 ≤ k ≤ 27, -13 ≤ l ≤ 14          |
| Data/restraints/parameters         | 5164/0/289                                        |
| Goodness-of-fit on F <sup>2</sup>  | 0.861                                             |
| Largest diff. peak/hole/e          | 0.18/-0.38                                        |

**Representative experimental procedure for the synthesis of *N*-(3-(2-phenylphenyl)prop-2-yn-1-yl)-*N*-(2-bromophenyl)-4-methylbenzenesulfonamide (**1a**):**

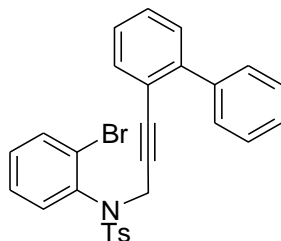

To a solution of *N*-(2-bromophenyl)-4-methyl-*N*-(prop-2-yn-1-yl)benzenesulfonamide (363 mg, 1mmol) in dimethyl sulfoxide (2 mL) and 2-phenyliodobenzene (308 mg, 1.1 mmol), triethylamine (202 mg, 2 mmol), CuI (4 mg, 0.02 mmol) and Pd(PPh<sub>3</sub>)<sub>4</sub> (12 mg, 0.02 mmol) were added successively. The resulting solution was stirred at room temperature under argon atmosphere for overnight. After the completion of the reaction (monitored by TLC), the crude reaction mixture was extracted with ethyl acetate. The organic extract was washed with brine solution, dried over anhydrous Na<sub>2</sub>SO<sub>4</sub> and concentrated. The product was subjected to column chromatography (silica gel, 60-120 mesh), eluting with pet ether/EtOAc 90:10 (v/v) to afford the product **1a** as a yellow semisolid (463 mg, 0.90mmol, 90%). <sup>1</sup>H NMR (CDCl<sub>3</sub>, 300 MHz) δ 2.42 (s, 3H), 4.28 (d, *J* = 18.0 Hz, 1H), 4.93 (d, *J* = 18.0 Hz, 1H), 6.99 (d, *J* = 6.3Hz, 1H), 7.13 (d, *J* = 6.6 Hz, 1H), 7.18–7.26 (m, 4H), 7.29–7.36 (m, 6H), 7.42 (t, *J* = 4.2 Hz, 2H), 7.64 (d, *J* = 8.7 Hz, 1H), 7.70 (d, *J* = 8.1 Hz, 2H) ppm. <sup>13</sup>C NMR (CDCl<sub>3</sub>, 75 MHz) δ 21.7, 41.4, 85.3, 85.9, 120.7, 125.8, 127.0, 127.5, 127.9, 128.1, 128.8, 129.1, 129.5, 129.6, 130.2, 132.3, 133.6, 133.8, 137.2, 137.6, 140.3, 143.7, 143.8 ppm.

Compounds **1b-1o** were synthesised by the above similar procedure.

**Representative experimental procedure for the synthesis of (z)-2-((1-tosylindolin-3-ylidene)methyl)biphenyl(**2a**):**

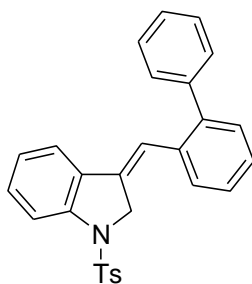

To a solution of *N*-(3-([1,1'-biphenyl]-2-yl)prop-2-yn-1-yl)-*N*-(2-bromophenyl)-4-methylbenzenesulfonamide **1a** (155 mg, 0.3 mmol) in 2.5 M K<sub>2</sub>CO<sub>3</sub>(2 mL) and 2 mL ethanol-toluene (1:1), PCy<sub>3</sub> (8 mg, 0.03 mmol) and Pd(OAc)<sub>2</sub> (4 mg, 0.015 mmol) were added successively. The resulting solution was stirred at 75 °C under argon atmosphere for 3 h. After the completion of the reaction (monitored by TLC), the crude reaction mixture was extracted with ethyl acetate. The organic extract was washed with brine solution, dried over anhydrous Na<sub>2</sub>SO<sub>4</sub> and concentrated. The product was subjected to column chromatography (silica gel, 60-120 mesh), eluting with pet ether/EtOAc 95:5 (v/v) to afford the product **2a** as a greenish white solid (109 mg, 0.25 mmol, 82%); m. p. 116-118 °C. <sup>1</sup>H NMR (CDCl<sub>3</sub>, 400 MHz) δ 2.37 (s, 3H), 4.80 (d, *J* = 2.8 Hz, 2H), 6.70 (d, *J* = 2.8 Hz, 1H), 6.96 (t, *J* = 7.6 Hz, 1H), 7.16 (d, *J* = 7.6 Hz, 1H), 7.20–7.27 (m, 5H), 7.29–7.44 (m, 7H), 7.72 (t, *J* = 8.0 Hz, 3H) ppm. <sup>13</sup>C NMR (CDCl<sub>3</sub>, 100MHz) δ 21.7, 54.5, 115.0, 118.2, 120.6, 123.9, 127.3, 127.4, 127.5, 127.6, 127.7, 128.2, 129.8, 129.9, 130.6, 131.4, 132.8, 134.0, 134.2, 140.9, 141.9, 143.4, 144.4, ppm.

**(z)-2-(1-(1-tosylindolin-3-ylidene)methyl)-4'-methoxybiphenyl (2b):**

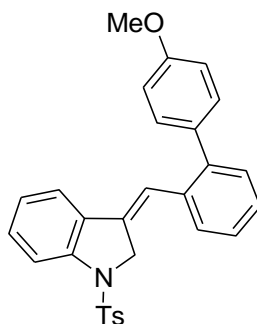

To a solution of *N*-(2-bromophenyl)-*N*-(3-(4'-methoxy-[1,1'-biphenyl]-2-yl)prop-2-yn-1-yl)-4-methylbenzenesulfonamide **1b** (164 mg, 0.3 mmol) in 2.5 M K<sub>2</sub>CO<sub>3</sub> (2 mL) and 2 mL ethanol-toluene (1:1), PCy<sub>3</sub> (8 mg, 0.03 mmol) and Pd(OAc)<sub>2</sub> (4 mg, 0.015 mmol) were added successively. The resulting solution was stirred at 75 °C under argon atmosphere for 4 h. After the completion of the reaction (monitored by TLC), the crude reaction mixture was extracted with ethyl acetate. The organic extract was washed with brine solution, dried over anhydrous Na<sub>2</sub>SO<sub>4</sub> and concentrated. The product was subjected to column chromatography (silica gel, 60-120 mesh), eluting with pet ether/EtOAc 95:5 (v/v) to afford the product **2b** as a greenish white solid (117 mg, 0.25 mmol, 83%); m. p. 130-132 °C. <sup>1</sup>H NMR (CDCl<sub>3</sub>, 500 MHz) δ 2.39 (s, 3H), 3.84 (s, 3H), 4.78 (d, *J* = 3.0 Hz, 2H), 6.72 (t, *J* = 3.0 Hz, 1H), 6.90 (d, *J* = 8.5 Hz, 2H), 6.97 (t, *J* = 7.5 Hz, 1H), 7.16–7.25 (m, 4H), 7.31–7.41 (m, 6H), 7.72 (dd, *J* = 8.5, 12.0, Hz, 3H) ppm. <sup>13</sup>C NMR (CDCl<sub>3</sub>, 100 MHz) δ 21.6, 54.5, 55.4, 113.7, 115.0, 118.4, 120.5, 123.9, 127.2, 127.3, 127.5, 127.6, 129.7, 129.9, 130.6, 130.9, 131.4, 132.6, 133.2, 134.1, 134.2, 141.5, 143.4, 144.3, 159.0 ppm.

**(z)-2-(1-(1-tosylindolin-3-ylidene)methyl)-4'-methylbiphenyl (2c):**

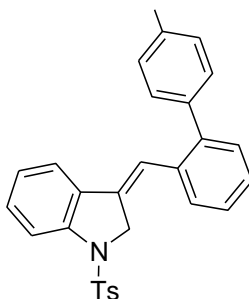

To a solution of *N*-(2-bromophenyl)-4-methyl-*N*-(3-(4'-methyl-[1,1'-biphenyl]-2-yl)prop-2-yn-1-yl)benzenesulfonamide **1c** (159 mg, 0.3 mmol) in 2.5 M K<sub>2</sub>CO<sub>3</sub> (2 mL) and 2 mL ethanol-toluene (1:1), PCy<sub>3</sub> (8 mg, 0.03 mmol) and Pd(OAc)<sub>2</sub> (4 mg, 0.015 mmol) were added successively. The resulting solution was stirred at 70-75 °C under argon atmosphere for 4 h. After the completion of the reaction (monitored by TLC), the crude reaction mixture was extracted with ethyl acetate. The organic extract was washed with brine solution, dried over anhydrous Na<sub>2</sub>SO<sub>4</sub> and concentrated. The product was subjected to column chromatography (silica gel, 60-120 mesh), eluting with pet ether/EtOAc 95:5 (v/v) to afford the product **2c** as a greenish white solid (106 mg, 0.24 mmol, 81%); m. p. 138-140 °C. <sup>1</sup>H NMR (CDCl<sub>3</sub>, 400 MHz) δ 2.28 (s, 3H), 2.30 (s, 3H), 4.72 (d, *J* = 3.2 Hz, 2H), 6.63 (t, *J* = 3.2 Hz, 1H), 6.88 (t, *J* = 7.6 Hz, 1H), 7.07–7.11 (m, 5H), 7.14–7.17 (m, 3H), 7.22–7.31 (m, 4H), 7.63 (t, *J* = 8.4 Hz, 3H). ppm. <sup>13</sup>C NMR (CDCl<sub>3</sub>, 100 MHz) δ 21.3, 21.6, 54.5, 114.9, 118.4, 120.6, 123.9, 127.3, 127.4, 127.6, 128.9, 129.7, 129.9, 130.6, 131.4, 132.5, 134.0, 134.1, 137.0, 137.8, 141.8, 143.3, 144.4 ppm.

**(z)-2-((1-tosylindolin-3-ylidene)methyl)-4'-chlorobiphenyl (2d):**

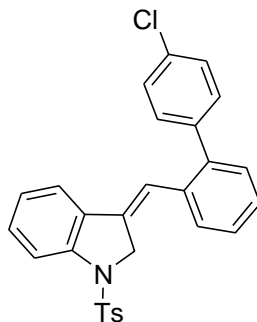

To a solution of *N*-(2-bromophenyl)-*N*-(3-(4'-chloro-[1,1'-biphenyl]-2-yl)prop-2-yn-1-yl)-4-methylbenzenesulfonamide **1d** (165 mg, 0.3 mmol) in 2.5 M K<sub>2</sub>CO<sub>3</sub> (2 mL) and 2 mL ethanol-toluene (1:1), PCy<sub>3</sub> (8 mg, 0.03 mmol) and Pd(OAc)<sub>2</sub> (4 mg, 0.015 mmol) were added successively. The resulting solution was stirred at 70-75 °C under argon atmosphere for 4 h. After the completion of the reaction (monitored by TLC), the crude reaction mixture was extracted with ethyl acetate. The organic extract was washed with brine solution, dried over anhydrous Na<sub>2</sub>SO<sub>4</sub> and concentrated. The product was subjected to column chromatography (silica gel, 60-120 mesh), eluting with pet ether/EtOAc 95:5 (v/v) to afford the product **2d** as a greenish white solid (118 mg, 0.25mmol, 85%); m. p. 142-144 °C. <sup>1</sup>H NMR (CDCl<sub>3</sub>, 400 MHz) δ 2.26 (s, 3H), 4.66 (d, *J* = 2.8 Hz, 2H), 6.55 (t, *J* = 2.8 Hz, 1H), 6.88 (t, *J* = 7.6 Hz, 1H), 7.09 (d, *J* = 8.8 Hz, 3H), 7.15 (t, *J* = 8.0 Hz, 3H), 7.21–7.27 (m, 5H), 7.32 (dd, *J* = 7.6, 2.4 Hz, 1H), 7.62 (dd, *J* = 11.2, 8.4 Hz, 3H). ppm. <sup>13</sup>C NMR (CDCl<sub>3</sub>, 100 MHz) δ 21.6, 54.3, 114.9, 117.6, 120.5, 123.9, 127.2, 127.5, 127.7, 127.9, 128.4, 129.9, 130.4, 131.0, 133.2, 133.4, 134.0, 139.2, 140.3, 143.3, 144.4. ppm.

**(z)-2-((1-tosylindolin-3-ylidene)methyl)-5-methylbiphenyl (2e):**

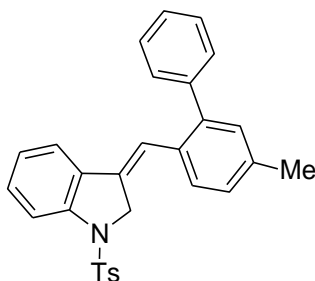

To a solution of *N*-(2-bromophenyl)-4-methyl-*N*-(3-(5-methyl-[1,1'-biphenyl]-2-yl)prop-2-yn-1-yl)benzenesulfonamide **1e** (159 mg, 0.3 mmol) in 2.5 M K<sub>2</sub>CO<sub>3</sub> (2 mL) and 2 mL ethanol-toluene (1:1), PCy<sub>3</sub> (8 mg, 0.03 mmol) and Pd(OAc)<sub>2</sub> (4 mg, 0.015 mmol) were added successively. The resulting solution was stirred at 70-75 °C under argon atmosphere for 4 h. After the completion of the reaction (monitored by TLC), the crude reaction mixture was extracted with ethyl acetate. The organic extract was washed with brine solution, dried over anhydrous Na<sub>2</sub>SO<sub>4</sub> and concentrated. The product was subjected to column chromatography (silica gel, 60-120 mesh), eluting with pet ether/EtOAc 95:5 (v/v) to afford the product **2e** as a yellowish white solid (108 mg, 0.24mmol, 81%); m. p. 126-128 °C. <sup>1</sup>H NMR (CDCl<sub>3</sub>, 300 MHz) δ 2.37 (s, 3H), 2.42 (s, 3H), 4.80 (d, *J* = 3.0 Hz, 2H), 6.68 (bs, 1H), 6.95 (t, *J* = 7.5 Hz, 1H), 7.14 (d, *J* = 7.5 Hz, 1H), 7.19–7.26 (m, 8H), 7.32-7.36 (m, 3H), 7.70 (dd, *J* = 7.8, 4.5 Hz, 3H). ppm. <sup>13</sup>C NMR (CDCl<sub>3</sub>, 75 MHz) δ 21.4, 21.7, 54.6, 114.9, 118.1, 120.5, 123.9, 127.4, 128.2, 128.4, 129.6, 129.8, 129.9, 131.2, 131.4, 131.6, 131.9, 134.2, 137.5, 141.0, 141.9, 143.3, 144.4. ppm.

**(z)-2-((5-methyl-1-tosylindolin-3-ylidene)methyl)biphenyl (2f):**

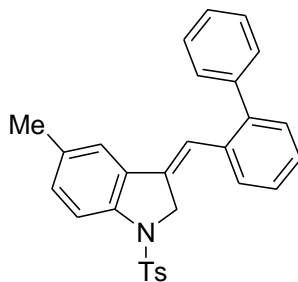

To a solution of *N*-(3-([1,1'-biphenyl]-2-yl)prop-2-yn-1-yl)-*N*-(2-bromo-4-methylphenyl)-4-methylbenzenesulfonamide **1f** (159 mg, 0.3 mmol) in 2.5 M K<sub>2</sub>CO<sub>3</sub> (2 mL) and 2 mL ethanol-toluene (1:1), PCy<sub>3</sub> (8 mg, 0.03 mmol) and Pd(OAc)<sub>2</sub> (4 mg, 0.015 mmol) were added successively. The resulting solution was stirred at 75 °C under argon atmosphere for 4 h. After the completion of the reaction (monitored by TLC), the crude reaction mixture was extracted with ethyl acetate. The organic extract was washed with brine solution, dried over anhydrous Na<sub>2</sub>SO<sub>4</sub> and concentrated. The product was subjected to column chromatography (silica gel, 60-120 mesh), eluting with pet ether/EtOAc 95:5 (v/v) to afford the product **2f** as a yellowish white solid (108 mg, 0.24 mmol, 80%); m. p. 136-138 °C. <sup>1</sup>H NMR (CDCl<sub>3</sub>, 400 MHz) δ 2.24 (s, 3H), 2.37 (s, 3H), 4.76 (d, *J* = 2.8 Hz, 2H), 6.65 (t, *J* = 2.8 Hz, 1H), 6.96 (s, 1H), 7.05 (d, *J* = 8.4 Hz, 1H), 7.22–7.29 (m, 4H), 7.30–7.44 (m, 7H), 7.62 (d, *J* = 8.0 Hz, 1H), 7.68 (d, *J* = 8.4 Hz, 2H). ppm. <sup>13</sup>C NMR (CDCl<sub>3</sub>, 100 MHz) δ 21.1, 21.7, 54.7, 114.98, 117.94, 120.9, 127.3, 127.4, 127.5, 127.6, 128.2, 129.8, 129.9, 130.7, 131.5, 133.1, 133.7, 134.1, 134.2, 140.9, 141.3, 141.7, 144.3 ppm.

**(z)-2-((5,7-dimethyl-1-tosylindolin-3-ylidene)methyl)biphenyl (2g):**

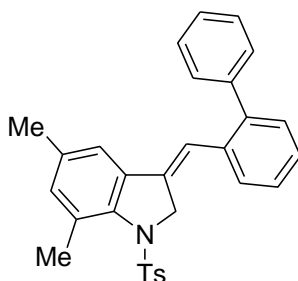

To a solution of *N*-(3-([1,1'-biphenyl]-2-yl)prop-2-yn-1-yl)-*N*-(2-bromo-4,6-dimethylphenyl)-4-methylbenzenesulfonamide **1g** (163 mg, 0.3 mmol) in 2.5 M K<sub>2</sub>CO<sub>3</sub> (2 mL) and 2 mL ethanol-toluene (1:1), PCy<sub>3</sub> (8 mg, 0.03 mmol) and Pd(OAc)<sub>2</sub> (4 mg, 0.015 mmol) were added successively. The resulting solution was stirred at 75 °C under argon atmosphere for 5 h. After the completion of the reaction (monitored by TLC), the crude reaction mixture was extracted with ethyl acetate. The organic extract was washed with brine solution, dried over anhydrous Na<sub>2</sub>SO<sub>4</sub> and concentrated. The product was subjected to column chromatography (silica gel, 60-120 mesh), eluting with pet ether/EtOAc 95:5 (v/v) to afford the product **2g** as a greenish white solid (116 mg, 0.25 mmol, 84%); m. p. 138-140 °C. <sup>1</sup>H NMR (CDCl<sub>3</sub>, 400 MHz) δ 2.25 (s, 3H), 2.34 (s, 3H), 2.58 (s, 3H), 4.70 (d, *J* = 2.4 Hz, 2H), 6.32 (d, *J* = 2.4 Hz, 1H), 6.71 (s, 1H), 6.96 (s, 1H), 7.00–7.05 (m, 4H), 7.15 (d, *J* = 6.8 Hz, 1H), 7.20–7.29 (m, 2H), 7.31 (dd, *J* = 2.0, 4.8 Hz, 3H), 7.35–7.38 (m, 3H). ppm. <sup>13</sup>C NMR (CDCl<sub>3</sub>, 100 MHz) δ 19.8, 21.2, 21.8, 56.8, 118.3, 118.6, 125.0, 127.2, 127.5, 127.6, 127.7, 128.1, 128.2, 129.2, 129.8, 130.4, 132.3, 133.0, 133.2, 134.1, 135.1, 136.4, 137.7, 140.8, 141.1, 141.4, 143.8 ppm.

**(z)-2-((5-fluoro-1-tosylindolin-3-ylidene)methyl)biphenyl (2h):**

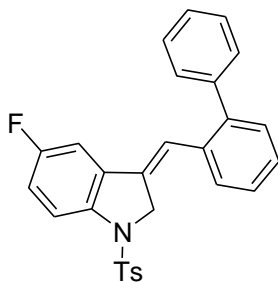

To a solution of *N*-(3-([1,1'-biphenyl]-2-yl)prop-2-yn-1-yl)-*N*-(2-bromo-4-fluorophenyl)-4-methylbenzenesulfonamide **1h** (160 mg, 0.3 mmol) in 2.5 M K<sub>2</sub>CO<sub>3</sub> (2 mL) and 2 mL ethanol-toluene (1:1), PCy<sub>3</sub> (8 mg, 0.03 mmol) and Pd(OAc)<sub>2</sub> (4 mg, 0.015 mmol) were added successively. The resulting solution was stirred at 70-75 °C under argon atmosphere for 4 h. After the completion of the reaction (monitored by TLC), the crude reaction mixture was extracted with ethyl acetate. The organic extract was washed with brine solution, dried over anhydrous Na<sub>2</sub>SO<sub>4</sub> and concentrated. The product was subjected to column chromatography (silica gel, 60-120 mesh), eluting with pet ether/EtOAc 95:5 (v/v) to afford the product **2h** as a greenish white solid (114 mg, 0.25mmol, 83%); m. p. 152-154 °C. <sup>1</sup>H NMR (CDCl<sub>3</sub>, 400 MHz) δ 2.29 (s, 3H), 4.72 (d, *J* = 2.8 Hz, 2H), 6.54 (t, *J* = 2.8 Hz, 1H), 6.71 (dd, *J* = 8.0, 2.4Hz, 1H), 6.84 (td, *J* = 9.2, 2.8 Hz, 1H), 7.14 (dd, *J* = 7.6, 2.0Hz, 3H), 7.16 (s, 1H), 7.21 (d, *J* = 7.2 Hz, 1H) 7.25–7.30 (m, 5H), 7.32–7.34 (m, 1H), 7.56–7.61 (m, 3H). ppm. <sup>13</sup>C NMR (CDCl<sub>3</sub>, 100 MHz) δ 21.7, 54.9, 107.2 (d, *J*<sub>C-F</sub> = 24.0 Hz), 116.4 (d, *J*<sub>C-F</sub> = 9.0 Hz), 116.5, 119.5, 127.3, 127.4, 127.4, 127.6, 127.9, 128.2, 129.7, 129.9, 130.6, 132.0 (d, *J*<sub>C-F</sub> = 3.0 Hz), 133.3, 133.4, 133.5, 133.7, 139.4, 140.6, 142.0, 144.5, 160.0 (d, *J*<sub>C-F</sub> = 241.0 Hz). ppm.

**(z)-2-((5-trifluoromethyl-1-tosylindolin-3-ylidene)methyl)biphenyl (2i)**

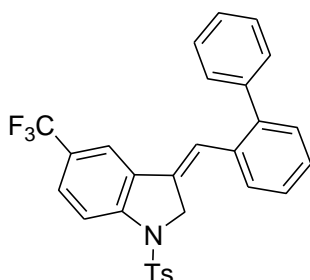

To a solution of *N*-(3-([1,1'-biphenyl]-2-yl)prop-2-yn-1-yl)-*N*-(2-bromo-4-(trifluoromethyl)phenyl)-4-methylbenzenesulfonamide **1i** (175 mg, 0.3 mmol) in 2.5 M K<sub>2</sub>CO<sub>3</sub> (2 mL) and 2 mL ethanol-toluene (1:1), PCy<sub>3</sub> (8 mg, 0.03 mmol) and Pd(OAc)<sub>2</sub> (4 mg, 0.015 mmol) were added successively. The resulting solution was stirred at 70-75 °C under argon atmosphere for 5 h. After the completion of the reaction (monitored by TLC), the crude reaction mixture was extracted with ethyl acetate. The organic extract was washed with brine solution, dried over anhydrous Na<sub>2</sub>SO<sub>4</sub> and concentrated. The product was subjected to column chromatography (silica gel, 60-120 mesh), eluting with pet ether/EtOAc 95:5 (v/v) to afford the product **2i** as a pale greenish solid (116 mg, 0.23mmol, 78%); m. p. 124-126 °C. <sup>1</sup>H NMR (CDCl<sub>3</sub>, 400 MHz) δ 2.40 (s, 3H), 4.80 (d, *J* = 3.2 Hz, 2H), 6.80 (t, *J* = 3.2Hz, 1H), 7.25–7.29 (m, 4H), 7.32 (d, *J* = 7.2 Hz, 1H), 7.35–7.43 (m, 7H), 7.47 (d, *J* = 8.8 Hz, 1H), 7.72 (d, *J* = 8.0 Hz, 2H), 7.77 (d, *J* = 8.4 Hz, 1H). ppm. <sup>13</sup>C NMR (CDCl<sub>3</sub>, 100 MHz) δ 21.7, 54.8, 114.4, 117.7, 120.1, 126.8, 127.2, 127.6, 127.6, 128.1, 128.3, 129.7, 130.1, 130.8, 131.2, 133.5, 134.0, 140.5, 142.0, 144.9, 145.8. ppm.



**(z)-2-((5-chloro-1-tosylindolin-3-ylidene)methyl)-4'-methoxybiphenyl (2j):**

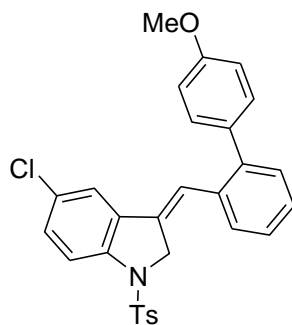

To a solution of *N*-(2-bromo-4-chlorophenyl)-*N*-(3-(4'-methoxy-[1,1'-biphenyl]-2-yl)prop-2-yn-1-yl)-4-methylbenzenesulfonamide **1j** (175 mg, 0.3 mmol) in 2.5 M K<sub>2</sub>CO<sub>3</sub> (2 mL) and 2 mL ethanol-toluene (1:1), PCy<sub>3</sub> (8 mg, 0.03 mmol) and Pd(OAc)<sub>2</sub> (4 mg, 0.015 mmol) were added successively. The resulting solution was stirred at 70-75 °C under argon atmosphere for 4 h. After the completion of the reaction (monitored by TLC), the crude reaction mixture was extracted with ethyl acetate. The organic extract was washed with brine solution, dried over anhydrous Na<sub>2</sub>SO<sub>4</sub> and concentrated. The product was subjected to column chromatography (silica gel, 60-120 mesh), eluting with pet ether/EtOAc 95:5 (v/v) to afford the product **2j** as a white solid (116 mg, 0.23mmol, 75%) as a mixture of non-separable isomers (E:Z=1:1.2); m. p. 144-146 °C. <sup>1</sup>H NMR (CDCl<sub>3</sub>, 400 MHz) δ 2.28 (s, 3.6H), 2.30 (s, 3H), 3.75 (s, 3.6H), 3.76 (s, 3H), 4.67 (d, *J* = 2.8 Hz, 2H), 4.70 (d, *J* = 3.2 Hz, 2.4H), 6.62 (dt, *J* = 12.0, 3.2 Hz, 2H), 6.80–6.83 (m, 4H), 6.88 (td, *J* = 8.0, 1.0Hz, 1H), 7.05–7.16 (m, 14H), 7.18–7.23 (m, 2H), 7.26–7.30 (m, 6H), 7.60 (dt, *J* = 21.6, 9.6Hz, 6H). ppm. <sup>13</sup>C NMR (CDCl<sub>3</sub>, 100 MHz) δ 21.6, 54.4, 54.8, 55.3, 113.6, 113.8, 114.9, 116.0, 118.4, 119.9, 120.5, 120.5, 123.9, 127.2, 127.3, 127.4, 127.5, 127.6, 128.0, 129.4, 129.5, 129.7, 129.9, 130.0, 130.6, 130.7, 130.8, 130.9, 131.4, 132.5, 133.2, 133.6, 133.7, 134.0, 134.1, 141.4, 141.6, 141.9, 144.3, 144.3, 144.6, 158.9, 159.0. ppm.

**(z)-2-((5-fluoro-1-tosylindolin-3-ylidene)methyl)-4'-methoxybiphenyl (2k):**

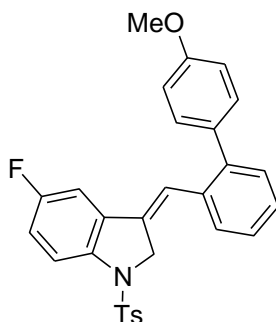

To a solution of *N*-(2-bromo-4-fluorophenyl)-*N*-(3-(4'-methoxy-[1,1'-biphenyl]-2-yl)prop-2-yn-1-yl)-4-methylbenzenesulfonamide **1k** (169 mg, 0.3 mmol) in 2.5 M K<sub>2</sub>CO<sub>3</sub> (2 mL) and 2 mL ethanol-toluene (1:1), PCy<sub>3</sub> (8 mg, 0.03 mmol) and Pd(OAc)<sub>2</sub> (4 mg, 0.015 mmol) were added successively. The resulting solution was stirred at 70-75 °C under argon atmosphere for 4 h. After the completion of the reaction (monitored by TLC), the crude reaction mixture was extracted with ethyl acetate. The organic extract was washed with brine solution, dried over anhydrous Na<sub>2</sub>SO<sub>4</sub> and concentrated. The product was subjected to column chromatography (silica gel, 60-120 mesh), eluting with pet ether/EtOAc 95:5 (v/v) to afford the product **2k** as a greenish white solid (112 mg, 0.23mmol, 78%); m. p. 158-160 °C. <sup>1</sup>H NMR (CDCl<sub>3</sub>, 400 MHz) δ 2.28 (s, 3H), 3.75 (s, 3H), 4.69 (d, *J* = 3.2 Hz, 2H), 6.56 (t, *J* = 3.2 Hz, 1H), 6.75 (dd, *J* = 8.0, 2.4Hz, 1H), 6.78–6.86 (m, 3H), 7.06 (dt, *J* = 6.8, 2.0 Hz, 2H), 7.14–7.18 (m, 3H), 7.20–7.30 (m, 3H), 7.55–7.60 (m, 3H). ppm. <sup>13</sup>C NMR (CDCl<sub>3</sub>, 100 MHz) δ 21.6, 54.3, 54.9, 107.2 (d, *J*<sub>C-F</sub> = 24.0 Hz), 113.7, 116.3 (d, *J*<sub>C-F</sub> = 7.0 Hz), 116.4 (d, *J*<sub>C-F</sub> = 9.0 Hz), 119.8, 127.2, 127.3, 127.4, 127.9, 129.9, 130.6, 130.8, 131.8 (d, *J*<sub>C-F</sub> = 2.0 Hz), 132.9, 133.3, 133.4, 133.5, 133.6, 139.4, 141.6, 144.5, 159.0, 160.0 (d, *J*<sub>C-F</sub> = 241.0 Hz), ppm.

**(z)-2-((5-methyl-1-tosylindolin-3-ylidene)methyl)-5-methylbiphenyl (2l):**

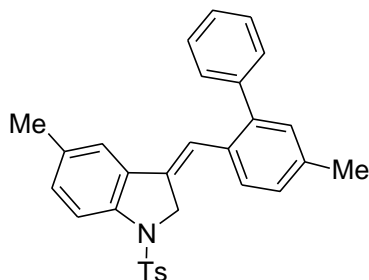

To a solution of *N*-(2-bromo-4-methylphenyl)-4-methyl-*N*-(3-(5-methyl-[1,1'-biphenyl]-2-yl)prop-2-yn-1-yl)benzenesulfonamide **1l** (164 mg, 0.3 mmol) in 2.5 M  $K_2CO_3$  (2 mL) and 2 mL ethanol-toluene (1:1),  $PCy_3$  (8 mg, 0.03 mmol) and  $Pd(OAc)_2$  (4 mg, 0.015 mmol) were added successively. The resulting solution was stirred at 70-75 °C under argon atmosphere for 5 h. After the completion of the reaction (monitored by TLC), the crude reaction mixture was extracted with ethyl acetate. The organic extract was washed with brine solution, dried over anhydrous  $Na_2SO_4$  and concentrated. The product was subjected to column chromatography (silica gel, 60-120 mesh), eluting with pet ether/EtOAc 95:5 (v/v) to afford the product **2l** as a greenish solid (112 mg, 0.24 mmol, 80%); m. p. 162-164 °C.  $^1H$  NMR ( $CDCl_3$ , 400 MHz)  $\delta$  2.23 (s, 3H), 2.36 (s, 3H), 2.41 (s, 3H), 4.76 (d,  $J$  = 2.8 Hz, 2H), 6.62 (t,  $J$  = 3.2 Hz, 1H), 6.94 (s, 1H), 7.03 (d,  $J$  = 8.0 Hz, 1H), 7.18–7.26 (m, 7H), 7.32–7.38 (m, 3H), 7.61 (d,  $J$  = 8.0 Hz, 1H), 7.67 (d,  $J$  = 8.0 Hz, 2H). ppm.  $^{13}C$  NMR ( $CDCl_3$ , 100 MHz)  $\delta$  21.0, 21.3, 21.6, 54.7, 114.9, 117.8, 120.8, 127.2, 127.3, 127.4, 128.2, 128.3, 129.8, 129.8, 130.4, 131.3, 131.4, 131.6, 132.2, 133.6, 134.1, 137.4, 141.0, 141.2, 141.7, 144.2. ppm.

**(z)-2-((1-mesyindolin-3-ylidene)methyl)-4'-methoxybiphenyl (2m):**

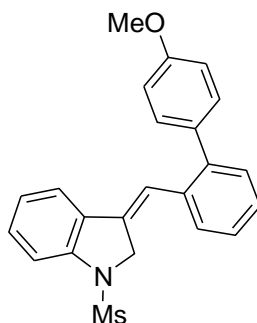

To a solution of *N*-(2-bromophenyl)-*N*-(3-(4'-methoxy-[1,1'-biphenyl]-2-yl)prop-2-yn-1-yl)methanesulfonamide **1m** (141 mg, 0.3 mmol) in 2.5 M  $K_2CO_3$  (2 mL) and 2 mL ethanol-toluene (1:1),  $PCy_3$  (8 mg, 0.03 mmol) and  $Pd(OAc)_2$  (4 mg, 0.015 mmol) were added successively. The resulting solution was stirred at 75 °C under argon atmosphere for 3 h. After the completion of the reaction (monitored by TLC), the crude reaction mixture was extracted with ethyl acetate. The organic extract was washed with brine solution, dried over anhydrous  $Na_2SO_4$  and concentrated. The product was subjected to column chromatography (silica gel, 60-120 mesh), eluting with pet ether/EtOAc 95:5 (v/v) to afford the product **2m** as a white solid (102 mg, 0.26 mmol, 85%); m. p. 146-148 °C.  $^1H$  NMR ( $CDCl_3$ , 500 MHz)  $\delta$  2.88 (s, 3H), 3.85 (s, 3H), 4.83 (d,  $J$  = 3.0 Hz, 2H), 6.88 (t,  $J$  = 3.5 Hz, 1H), 6.95 (dd,  $J$  = 7.0, 2.0 Hz, 2H), 7.04 (td,  $J$  = 7.5, 0.5 Hz, 1H), 7.24 (d,  $J$  = 7.5 Hz, 1H), 7.27 (dd,  $J$  = 5.0, 4.5 Hz, 2H), 7.29 (dd,  $J$  = 6.5, 2.0 Hz, 1H), 7.33 (d,  $J$  = 7.5 Hz, 1H), 7.34–7.39 (m, 3H), 7.51 (d,  $J$  = 8.5 Hz, 1H) ppm.  $^{13}C$  NMR ( $CDCl_3$ , 125 MHz)  $\delta$  35.3, 54.8, 55.4, 113.7, 113.8, 114.2, 118.8, 120.8, 124.1, 127.3, 127.5, 127.8, 129.9, 130.5, 130.6, 131.0, 131.2, 132.3, 133.3, 134.0, 141.6, 143.2, 159.0 ppm.

**(z)-2-((1-tosyl-7-azaindolin-3-ylidene)methyl)biphenyl (2n):**

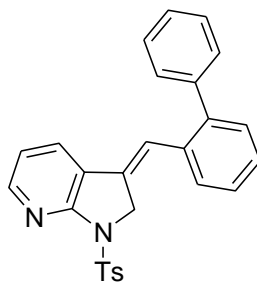

To a solution of *N*-(3-([1,1'-biphenyl]-2-yl)prop-2-yn-1-yl)-*N*-(3-bromopyridin-2-yl)-4-methylbenzenesulfonamide **1n** (155 mg, 0.3 mmol) in 2.5 M K<sub>2</sub>CO<sub>3</sub> (2 mL) and 2 mL ethanol-toluene (1:1), PCy<sub>3</sub> (8 mg, 0.03 mmol) and Pd(OAc)<sub>2</sub> (4 mg, 0.015 mmol) were added successively. The resulting solution was stirred at 75 °C under argon atmosphere for 5 h. After the completion of the reaction (monitored by TLC), the crude reaction mixture was extracted with ethyl acetate. The organic extract was washed with brine solution, dried over anhydrous Na<sub>2</sub>SO<sub>4</sub> and concentrated. The product was subjected to column chromatography (silica gel, 60-120 mesh), eluting with pet ether/EtOAc 90:10 (v/v) to afford the product **2n** as a yellow solid (100 mg, 0.23 mmol, 75%); m. p. 148-150 °C. <sup>1</sup>H NMR (CDCl<sub>3</sub>, 500 MHz) δ 2.39 (s, 3H), 4.95 (d, *J* = 3.0 Hz, 2H), 6.78 (t, *J* = 3.0 Hz, 1H), 6.81 (dd, *J* = 7.5, 5.5 Hz, 1H), 7.28 (dd, *J* = 14.5, 7.0 Hz, 2H), 7.31 (dd, *J* = 4.5, 2.0 Hz, 2H), 7.32–7.41 (m, 7H), 7.44 (dd, *J* = 6.0, 3.0 Hz, 1H), 8.01 (dd, *J* = 8.5, 2.0 Hz, 2H), 8.18 (dd, *J* = 5.0, 1.5 Hz, 1H). ppm. <sup>13</sup>C NMR (CDCl<sub>3</sub>, 125 MHz) δ 21.7, 53.3, 118.4, 120.7, 124.4, 127.4, 127.5, 127.7, 128.0, 128.1, 128.2, 128.3, 129.5, 129.6, 129.8, 130.7, 133.4, 135.6, 140.7, 142.0, 144.4, 148.6, 156.5 ppm.

**(z)-2-((5-methyl-1-tosyl-7-azaindolin-3-ylidene)methyl)biphenyl (2o):**

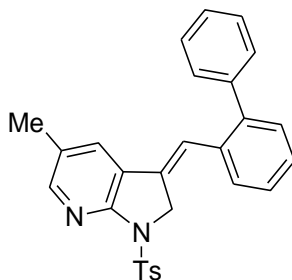

To a solution of *N*-(3-([1,1'-biphenyl]-2-yl)prop-2-yn-1-yl)-*N*-(3-bromo-5-methylpyridin-2-yl)-4-methylbenzenesulfonamide **1o** (159 mg, 0.3 mmol) in 2.5 M K<sub>2</sub>CO<sub>3</sub> (2 mL) and 2 mL ethanol-toluene (1:1), PCy<sub>3</sub> (8 mg, 0.03 mmol) and Pd(OAc)<sub>2</sub> (4 mg, 0.015 mmol) were added successively. The resulting solution was stirred at 75 °C under argon atmosphere for 5 h. After the completion of the reaction (monitored by TLC), the crude reaction mixture was extracted with ethyl acetate. The organic extract was washed with brine solution, dried over anhydrous Na<sub>2</sub>SO<sub>4</sub> and concentrated. The product was subjected to column chromatography (silica gel, 60-120 mesh), eluting with pet ether/EtOAc 90:10 (v/v) to afford the product **2o** as a yellow solid (95 mg, 0.21 mmol, 70%); m. p. 156-158 °C. <sup>1</sup>H NMR (CDCl<sub>3</sub>, 400 MHz) δ 2.21 (s, 3H), 2.40 (s, 3H), 4.94 (d, *J* = 3.2 Hz, 2H), 6.77 (t, *J* = 3.2 Hz, 1H), 7.22 (d, *J* = 1.6 Hz, 1H), 7.29 (d, *J* = 8.0 Hz, 2H), 7.32–7.35 (m, 2H), 7.38–7.40 (m, 6H), 7.42 (dd, *J* = 5.6, 1.6 Hz, 1H), 8.00 (d, *J* = 8.0 Hz, 2H), 8.03 (d, *J* = 1.0 Hz, 1H). ppm. <sup>13</sup>C NMR (CDCl<sub>3</sub>, 100 MHz) δ 18.0, 21.7, 53.5, 120.4, 127.4, 127.6, 127.7, 127.9, 128.0, 128.3, 128.9, 129.6, 129.8, 129.8, 130.7, 133.5, 140.8, 141.9, 144.3, 148.8, 154.8 ppm.

### Representative experimental procedure for the synthesis of 3-(9H-fluoren-9-yl)-1-tosyl-1H-indole(3a):

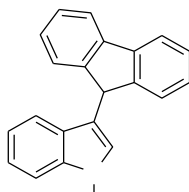

To a solution of **2a** (66 mg, 0.15 mmol) in dry nitromethane (1.5 mL) was added DDQ (0.15 mmol) in presence of anhydrous FeCl<sub>3</sub> (5 mg, 0.03 mmol) and 4Å molecular sieves as additive. The reaction mixture was stirred at 60 °C temperature under an argon atmosphere for 3 h. After the completion of the reaction (monitored by TLC), the crude reaction mixture was extracted with DCM. The organic extract was dried over anhydrous Na<sub>2</sub>SO<sub>4</sub> and product was purified by column chromatography (silica gel, 60-120 mesh), eluting with pet ether/EtOAc 97:3 (v/v) to afford the product **3a** as a white solid (56 mg, 0.13 mmol, 85%), m. p. 166-168 °C. <sup>1</sup>H NMR (CDCl<sub>3</sub>, 300 MHz) δ 2.37 (s, 3H), 5.24 (s, 1H), 6.70 (d, *J* = 7.8 Hz, 1H), 6.95 (t, *J* = 8.1 Hz, 1H), 7.17–7.23 (m, 5H), 7.24–7.29 (m, 2H), 7.40 (t, *J* = 7.2 Hz, 2H), 7.57 (s, 1H), 7.76 (d, *J* = 8.1 Hz, 2H), 7.84 (d, *J* = 6.9 Hz, 2H), 7.93 (d, *J* = 8.1 Hz, 1H). ppm. <sup>13</sup>C NMR (CDCl<sub>3</sub>, 75 MHz) δ 21.7, 45.8, 113.9, 120.2, 120.3, 122.3, 123.2, 124.5, 124.8, 125.1, 126.9, 127.5, 127.7, 129.8, 130.0, 135.3, 135.9, 141.0, 145.0, 146.0 ppm. HRMS: calcd for C<sub>28</sub>H<sub>21</sub>NO<sub>2</sub>S [M]<sup>+</sup> 435.1293; found 435.1292.

### 3-(2-methoxy-9H-fluoren-9-yl)-1-tosyl-1H-indole (3b):

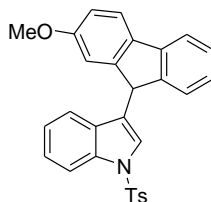

Compound **2b** (70 mg, 0.15 mmol) was treated with DDQ (0.15 mmol) in combination with anhydrous FeCl<sub>3</sub> (5 mg, 0.03 mmol) and 4Å molecular sieves under argon atmosphere at 60 °C temperature as described for the synthesis of **3b** for 2 h to afford **3b** as a off white solid (60 mg, 0.13 mmol, 84%), m. p. 147-149 °C. <sup>1</sup>H NMR (CDCl<sub>3</sub>, 300 MHz) δ 2.39 (s, 3H), 3.77 (s, 3H), 5.20 (s, 1H), 6.71 (d, *J* = 7.2 Hz, 1H), 6.82 (s, 1H), 6.95 (d, *J* = 7.2 Hz, 2H), 7.15–7.19 (m, 2H), 7.22–7.28 (m, 3H), 7.38 (t, *J* = 7.2 Hz, 1H), 7.60 (s, 1H), 7.77 (t, *J* = 8.7 Hz, 4H), 7.95 (d, *J* = 8.4 Hz, 1H). ppm. <sup>13</sup>C NMR (CDCl<sub>3</sub>, 75 MHz) δ 21.7, 45.8, 55.5, 110.6, 113.8, 119.3, 120.3, 122.4, 123.2, 124.5, 124.8, 124.9, 126.3, 126.9, 127.7, 129.7, 129.9, 133.9, 135.3, 135.9, 141.0, 145.0, 145.5, 147.8, 159.7 ppm. HRMS: calcd for C<sub>29</sub>H<sub>23</sub>NO<sub>3</sub>S [M+H]<sup>+</sup> 466.1432; found 466.1478.

### 3-(2-methyl-9H-fluoren-9-yl)-1-tosyl-1H-indole (3c):

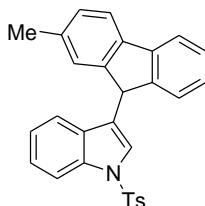

Compound **2c** (68 mg, 0.15 mmol) was treated with DDQ (0.15 mmol) in combination with anhydrous FeCl<sub>3</sub> (5 mg, 0.03 mmol) and 4Å molecular sieves under argon atmosphere at 60 °C temperature as described for the synthesis of **3c** for 2.5 h to afford **3c** as a white solid (58 mg, 0.13 mmol, 90%), m. p. 168-170 °C. <sup>1</sup>H NMR (CDCl<sub>3</sub>, 400 MHz) δ 2.32 (s, 3H), 2.37 (s, 3H), 5.20 (s, 1H), 6.70 (d, *J* = 6.0 Hz, 1H), 6.95 (t, *J* = 7.2 Hz, 1H), 7.08 (s, 1H), 7.17–7.26 (m, 6H), 7.39 (t, *J* = 7.2 Hz, 1H), 7.59 (s, 1H), 7.72–7.81 (m, 4H), 7.96 (d, *J* = 8.4 Hz, 1H). ppm. <sup>13</sup>C NMR (CDCl<sub>3</sub>, 100 MHz) δ 21.4, 21.6, 21.7, 45.6, 113.9, 119.8, 120.3, 122.6, 123.2, 124.5, 124.7, 125.0, 125.7, 126.8, 126.9, 127.7, 128.6, 129.0, 129.8, 129.9, 135.3, 135.9, 137.3, 138.3, 141.1, 144.9, 145.8, 146.2 ppm. HRMS: calcd for C<sub>29</sub>H<sub>23</sub>NO<sub>2</sub>SNa [M+Na]<sup>+</sup> 472.1347; found 472.1350.

### 3-(2-chloro-9H-fluoren-9-yl)-1-tosyl-1H-indole (3d):

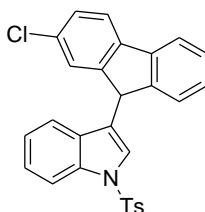

Compound **2d** (71 mg, 0.15 mmol) was treated with DDQ (0.15 mmol) in combination with anhydrous FeCl<sub>3</sub> (5 mg, 0.03 mmol) and 4Å molecular sieves under argon atmosphere at 60 °C temperature as described for the synthesis of **3d** for 2 h to afford **3d** as a off white solid (52 mg, 0.11 mmol, 74%), m. p. 158-160 °C. <sup>1</sup>H NMR (CDCl<sub>3</sub>, 400 MHz) δ 2.37 (s, 3H), 5.22 (s, 1H), 6.66 (d, *J* = 5.6 Hz, 1H), 6.96 (t, *J* = 7.6 Hz, 1H), 7.21–7.30 (m, 6H), 7.36–7.42 (m, 2H), 7.59 (s, 1H), 7.78 (td, *J* = 8.4, 13.2 Hz, 4H), 7.98 (d, *J* = 8.4 Hz, 1H). ppm. <sup>13</sup>C NMR (CDCl<sub>3</sub>, 100 MHz) δ 21.6, 45.7, 114.0, 120.0, 120.2, 121.0, 121.6, 123.3, 124.7, 124.9, 125.1, 125.3, 126.9, 127.8, 128.1, 129.5, 130.0, 133.1, 135.1, 135.9, 139.5, 139.9, 145.1, 145.8, 147.8 ppm. HRMS: calcd for C<sub>28</sub>H<sub>20</sub>ClNO<sub>2</sub>SNa [M+Na]<sup>+</sup> 492.0801; found 492.0800.

### 3-(3-methyl-9H-fluoren-9-yl)-1-tosyl-1H-indole (3e):

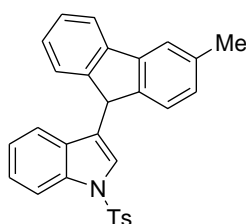

Compound **2e** (68 mg, 0.15 mmol) was treated with DDQ (0.15 mmol) in combination with anhydrous FeCl<sub>3</sub> (5 mg, 0.03 mmol) and 4Å molecular sieves under argon atmosphere at 60 °C temperature as described for the synthesis of **3e** for 2 h to afford **3e** as a off white solid (54 mg, 0.12 mmol, 83%), m. p. 156-158 °C. <sup>1</sup>H NMR (CDCl<sub>3</sub>, 300 MHz) δ 2.37 (s, 3H), 2.46 (s, 3H), 5.20 (s, 1H), 6.71 (d, *J* = 7.8 Hz, 1H), 6.95 (t, *J* = 7.8 Hz, 1H), 7.04 (d, *J* = 7.8 Hz, 1H), 7.19 (dd, *J* = 7.8, 15.6 Hz, 2H), 7.25–7.41 (m, 4H), 7.38 (t, *J* = 7.5 Hz, 1H), 7.55 (s, 1H), 7.65 (s, 1H), 7.79 (dd, *J* = 8.4, 15.6 Hz, 3H), 7.93 (d, *J* = 8.4 Hz, 1H). ppm. <sup>13</sup>C NMR (CDCl<sub>3</sub>, 125 MHz) δ 21.6, 45.4, 113.9, 120.0, 120.3, 120.7, 122.7, 123.2, 124.8, 125.1, 126.9, 127.3, 127.7, 128.4, 129.9, 135.6, 136.0, 137.5, 141.1, 141.2, 143.2, 144.9, 146.5 ppm. HRMS: calcd for C<sub>29</sub>H<sub>23</sub>NO<sub>2</sub>SNa [M+Na]<sup>+</sup> 472.1347; found 472.1385.

### 3-(9H-fluoren-9-yl)-5-methyl-1-tosyl-1H-indole (3f):

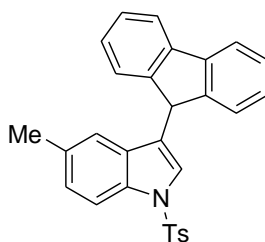

Compound **2f** (68 mg, 0.15 mmol) was treated with DDQ (0.15 mmol) in combination with anhydrous FeCl<sub>3</sub> (5 mg, 0.03 mmol) and 4Å molecular sieves under argon atmosphere at 60 °C temperature as described for the synthesis of **3f** for 2 h to afford **3f** as a off white solid (59 mg, 0.13 mmol, 88%), m. p. 183-185 °C. <sup>1</sup>H NMR (CDCl<sub>3</sub>, 400 MHz) δ 2.20 (s, 3H), 2.36 (s, 3H), 5.23 (s, 1H), 6.60 (bs, 1H), 7.05 (d, *J* = 8.4 Hz, 1H), 7.21–7.26 (m, 4H), 7.29 (d, *J* = 7.2 Hz, 2H), 7.41 (t, *J* = 7.6 Hz, 2H), 7.46 (s, 1H), 7.74 (d, *J* = 8.4 Hz, 2H), 7.84 (t, *J* = 8.4 Hz, 3H). ppm. <sup>13</sup>C NMR (CDCl<sub>3</sub>, 100 MHz) δ 21.4, 21.6, 45.6, 113.6, 120.0, 120.2, 122.3, 124.5, 125.0, 126.3, 126.9, 127.4, 127.7, 128.3, 129.9, 130.2, 132.9, 134.1, 135.3, 141.0, 144.9, 146.0 ppm. HRMS: calcd for C<sub>29</sub>H<sub>23</sub>NO<sub>2</sub>SNa [M+Na]<sup>+</sup> 472.1347; found 472.1385.

### 3-(9H-fluoren-9-yl)-5,7-dimethyl-1-tosyl-1H-indole (**3g**):

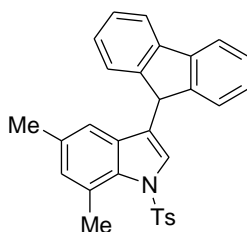

Compound **2g** (70 mg, 0.15 mmol) was treated with DDQ (0.15 mmol) in combination with anhydrous  $\text{FeCl}_3$  (5 mg, 0.03 mmol) and 4Å molecular sieves under argon atmosphere at 60 °C temperature as described for the synthesis of **3g** for 3.5 h to afford **3g** as a off white solid (57 mg, 0.12 mmol, 82%), m. p. 152-154 °C.  $^1\text{H}$  NMR ( $\text{CDCl}_3$ , 300 MHz)  $\delta$  2.16 (s, 3H), 2.37 (s, 3H), 2.54 (s, 3H), 5.21 (s, 1H), 6.51 (bs, 1H), 6.80 (s, 1H), 7.16–7.25 (m, 4H), 7.26–7.28 (m, 2H), 7.38–7.53 (m, 5H), 7.84 (d,  $J$  = 7.5 Hz, 2H). ppm.  $^{13}\text{C}$  NMR ( $\text{CDCl}_3$ , 75MHz)  $\delta$  21.1, 21.7, 21.7, 45.4, 117.7, 120.1, 122.6, 124.9, 125.6, 126.6, 127.4, 127.6, 128.2, 129.7, 130.0, 132.7, 133.5, 134.5, 136.3, 141.0, 144.4, 146.1 ppm. HRMS: cacl'd for  $\text{C}_{30}\text{H}_{25}\text{NO}_2\text{SNa}$   $[\text{M}+\text{Na}]^+$  486.1504; found 486.1502.

### 3-(9H-fluoren-9-yl)-5-fluoro-1-tosyl-1H-indole (**3h**):

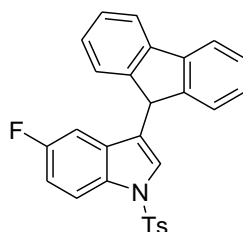

Compound **2h** (68 mg, 0.15 mmol) was treated with DDQ (0.15 mmol) in combination with anhydrous  $\text{FeCl}_3$  (5 mg, 0.03 mmol) and 4Å molecular sieves under argon atmosphere at 60°C temperature as described for the synthesis of **3h** for 3 h to afford **3h** as a white solid (54 mg, 0.12 mmol, 80%), m. p. 208-210 °C.  $^1\text{H}$  NMR ( $\text{CDCl}_3$ , 400 MHz)  $\delta$  2.38 (s, 3H), 5.20 (s, 1H), 6.25 (d,  $J$  = 8.0 Hz, 1H), 6.93 (t,  $J$  = 8.0 Hz, 1H), 7.24–7.28 (m, 6H), 7.43 (t,  $J$  = 8.0 Hz, 2H), 7.66 (s, 1H), 7.76 (d,  $J$  = 8.8 Hz, 2H), 7.88 (dd,  $J$  = 8.0, 8.0 Hz, 3H). ppm.  $^{13}\text{C}$  NMR ( $\text{CDCl}_3$ , 100 MHz)  $\delta$  21.7, 45.7, 106.0 (d,  $J_{\text{C-F}}$  = 24.0 Hz), 112.9 (d,  $J_{\text{C-F}}$  = 26.0 Hz), 114.9 (d,  $J_{\text{C-F}}$  = 9.0 Hz), 122.2 (d,  $J_{\text{C-F}}$  = 4.0 Hz), 125.0, 126.8, 126.9, 127.5, 127.9, 128.3, 129.1, 129.9, 130.0, 130.6, 130.7, 132.3, 135.1, 141.0, 145.2, 145.5, 159.3 (d,  $J_{\text{C-F}}$  = 239.0 Hz), ppm. HRMS: cacl'd for  $\text{C}_{28}\text{H}_{20}\text{FNO}_2\text{SNa}$   $[\text{M}+\text{Na}]^+$  476.1096; found 476.1091.

### 3-(9H-fluoren-9-yl)-5-(trifluoromethyl)-1-tosyl-1H-indole (**3i**):

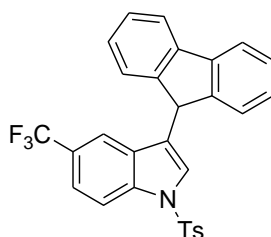

Compound **2i** (76 mg, 0.15 mmol) was treated with DDQ (0.15 mmol) in combination with anhydrous  $\text{FeCl}_3$  (5 mg, 0.03 mmol) and 4Å molecular sieves under argon atmosphere at 60 °C temperature as described for the synthesis of **3i** for 3.5 h to afford **3i** as a off white solid (55 mg, 0.11 mmol, 75%), m. p. 170-172 °C.  $^1\text{H}$  NMR ( $\text{CDCl}_3$ , 400 MHz)  $\delta$  2.38 (s, 3H), 5.27 (s, 1H), 7.06 (s, 1H), 7.22–7.28 (m, 6H), 7.41–7.47 (m, 3H), 7.62 (s, 1H), 7.77 (d,  $J$  = 8.4 Hz, 2H), 7.86 (d,  $J$  = 7.6 Hz, 2H), 8.04 (d,  $J$  = 8.8 Hz, 1H). ppm.  $^{13}\text{C}$  NMR ( $\text{CDCl}_3$ , 100 MHz)  $\delta$  21.7, 45.3, 114.2, 117.7 (q,  $J_{\text{C-F}}$  = 4.0 Hz), 120.3, 121.6 (q,  $J_{\text{C-F}}$  = 4.0 Hz), 122.6, 123.0, 124.9, 125.1, 125.4, 125.7 (d,  $J_{\text{C-F}}$  = 5.0 Hz), 126.9, 127.6, 128.0, 128.4, 129.6, 130.2, 135.0, 137.2, 141.0, 145.5 (d,  $J_{\text{C-F}}$  = 8.0 Hz), ppm. HRMS: cacl'd for  $\text{C}_{29}\text{H}_{20}\text{F}_3\text{NO}_2\text{SNa}$   $[\text{M}+\text{Na}]^+$  526.1065; found 526.1068.

### 5-chloro-3-(2-methoxy-9H-fluoren-9-yl)-1-tosyl-1H-indole (3j):

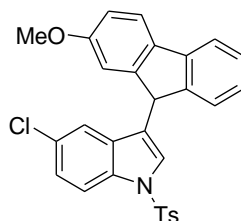

Compound **2j** (75 mg, 0.15 mmol) was treated with DDQ (0.15 mmol) in combination with anhydrous FeCl<sub>3</sub> (5 mg, 0.03 mmol) and 4Å molecular sieves under argon atmosphere at 60 °C temperature as described for the synthesis of **3j** for 3 h to afford **3j** as a pale yellow solid (57 mg, 0.11 mmol, 76%, 1:1.7 dr), m. p. 120-122 °C. <sup>1</sup>H NMR (CDCl<sub>3</sub>, 300 MHz) δ 2.36 (s, 3H), 2.37 (s, 5H), 3.74 (s, 3H) 3.75 (s, 5H), 5.13 (s, 1.7H), 5.18 (s, 1H) 6.63 (s, 1H), 6.70 (d, *J* = 7.8 Hz, 1H), 6.79 (dd, *J* = 1.8, 10.8 Hz, 3H), 6.95 (dt, *J* = 2.1, 8.4 Hz, 3H), 7.11–7.26 (m, 14H), 7.33–7.40 (m, 3H), 7.58 (s, 3H), 7.60–7.61 (m, 10H), 7.72 (d, *J* = 3.3 Hz, 2H), 7.75 (d, *J* = 3.3 Hz, 1H). ppm. <sup>13</sup>C NMR (CDCl<sub>3</sub>, 100 MHz) δ 21.6, 21.7, 45.5, 45.8, 55.5, 55.5, 110.6, 110.7, 113.8, 114.9, 119.3, 119.5, 119.9, 120.3, 120.8, 121.0, 122.0, 123.2, 124.5, 124.7, 124.8, 124.9, 125.2, 125.8, 126.3, 126.4, 126.9, 126.9, 127.7, 127.9, 129.1, 129.8, 130.0, 130.9, 133.9, 134.0, 134.3, 135.0, 140.9, 145.0, 145.0, 145.3, 145.5, 147.4, 147.9, 159.8, 159.8 ppm. HRMS: calcd for C<sub>29</sub>H<sub>22</sub>ClNO<sub>3</sub>Na [M+Na]<sup>+</sup> 522.0907; found 522.0908.

### 5-fluoro-3-(2-methoxy-9H-fluoren-9-yl)-1-tosyl-1H-indole (3k):

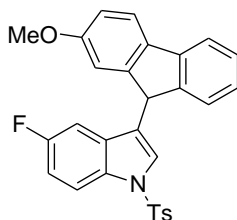

Compound **2k** (73 mg, 0.15 mmol) was treated with DDQ (0.15 mmol) in combination with anhydrous FeCl<sub>3</sub> (5 mg, 0.03 mmol) and 4Å molecular sieves under argon atmosphere at 60°C temperature as described for the synthesis of **3k** for 3 h to afford **3k** as a white solid (58 mg, 0.12 mmol, 78%), m. p. 138-140°C. <sup>1</sup>H NMR (CDCl<sub>3</sub>, 400 MHz) δ 2.37 (s, 3H), 3.74 (s, 3H), 5.11 (s, 1H), 6.21 (d, *J* = 8.0 Hz, 1H), 6.22 (s, 1H), 6.89–6.95 (m, 2H), 7.16 (dd, *J* = 7.6, 13.2 Hz, 2H), 7.23–7.25 (m, 2H) 7.36 (t, *J* = 7.2 Hz, 1H), 7.64 (s, 1H), 7.71–7.75 (m, 4H) 7.86 (dd, *J* = 4.4, 8.8 Hz, 1H). ppm. <sup>13</sup>C NMR (CDCl<sub>3</sub>, 125MHz) δ 21.7, 45.7, 55.5, 106.0 (d, *J*<sub>C-F</sub> = 23.7 Hz), 110.7, 112.9 (d, *J*<sub>C-F</sub> = 25.0 Hz), 113.8, 114.9 (d, *J*<sub>C-F</sub> = 8.7 Hz), 119.5, 121.0, 122.4 (d, *J*<sub>C-F</sub> = 3.7 Hz), 124.8, 126.3 (d, *J*<sub>C-F</sub> = 8.7 Hz), 126.9, 127.4, 127.9, 129.9 (d, *J*<sub>C-F</sub> = 26.2 Hz), 130.6 (d, *J*<sub>C-F</sub> = 8.7 Hz), 132.3, 133.9, 135.0, 141.0, 145.1 (d, *J*<sub>C-F</sub> = 26.2 Hz), 147.4, 159.8 159.4 (d, *J*<sub>C-F</sub> = 238.7 Hz) ppm. HRMS: calcd for C<sub>29</sub>H<sub>22</sub>FNO<sub>3</sub>S [M+H]<sup>+</sup> 484.1383; found 484.1374.

### 5-methyl-3-(3-methyl-9H-fluoren-9-yl)-1-tosyl-1H-indole (3l):

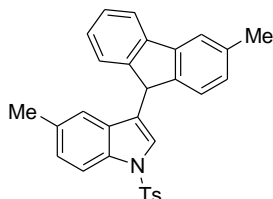

Compound **2l** (70 mg, 0.15 mmol) was treated with DDQ (0.15 mmol) in combination with anhydrous FeCl<sub>3</sub> (5 mg, 0.03 mmol) and 4Å molecular sieves under argon atmosphere at 60 °C temperature as described for the synthesis of **3l** for 3 h to afford **3l** as a off white solid (56 mg, 0.12 mmol, 80%), m. p. 168-170 °C. <sup>1</sup>H NMR (CDCl<sub>3</sub>, 400 MHz) δ 2.20 (s, 3H), 2.35 (s, 3H), 2.46 (s, 3H), 5.17 (s, 1H), 6.61 (bs, 1H), 7.03–7.05 (m, 2H), 7.15–7.26 (m, 5H), 7.39 (dd, *J* = 8.8, 15.6 Hz, 2H), 7.65 (s, 1H), 7.72 (d, *J* = 8.0 Hz, 2H), 7.81 (d, *J* = 8.4 Hz, 2H). ppm. <sup>13</sup>C NMR (CDCl<sub>3</sub>, 100MHz) δ 21.4, 21.7, 5.2, 113.6, 120.0, 120.0, 120.7, 122.6, 124.4, 124.7, 125.0, 126.2, 126.9, 127.3, 127.6, 128.4, 129.9, 132.8, 134.1, 135.3, 137.4, 141.1, 143.2, 144.8, 146.4 ppm. HRMS: calcd for C<sub>30</sub>H<sub>25</sub>NO<sub>2</sub>Na [M+Na]<sup>+</sup> 486.1504; found 486.1506.

### 3-(2-methoxy-9H-fluoren-9-yl)-1-mesy-1H-indole (3m):

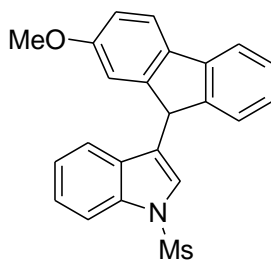

Compound **2m** (59 mg, 0.15 mmol) was treated with DDQ (0.15 mmol) in combination with anhydrous  $\text{FeCl}_3$  (5 mg, 0.03 mmol) and 4Å molecular sieves under argon atmosphere at 60 °C temperature as described for the synthesis of **3m** for 2 h to afford **3m** as a white solid (47 mg, 0.12 mmol, 81%), m. p. 160-162 °C.  $^1\text{H}$  NMR ( $\text{CDCl}_3$ , 400 MHz)  $\delta$  3.13 (s, 3H), 3.80 (s, 3H), 5.26 (s, 1H), 6.91 (d,  $J$  = 7.6 Hz, 1H), 6.95 (s, 1H), 6.99 (d,  $J$  = 8.4 Hz, 1H), 7.08 (t,  $J$  = 7.6 Hz, 1H), 7.20 (t,  $J$  = 7.2 Hz, 1H), 7.28–7.42 (m, 3H), 7.46 (s, 1H), 7.78 (d,  $J$  = 8.0 Hz, 2H), 7.89 (d,  $J$  = 8.4 Hz, 1H). ppm.  $^{13}\text{C}$  NMR ( $\text{CDCl}_3$ , 75MHz)  $\delta$  40.7, 45.7, 55.6, 110.9, 113.2, 113.7, 119.4, 120.6, 120.9, 122.2, 123.4, 123.9, 125.0, 125.1, 126.4, 127.8, 129.7, 134.0, 135.8, 141.0, 145.5, 147.8, 159.8 ppm. HRMS: caclcd for  $\text{C}_{23}\text{H}_{19}\text{NO}_3\text{SNa}$   $[\text{M}+\text{Na}]^+$  412.0983; found 412.0985.

### 3-(9H-fluoren-9-yl)-1-tosyl-1H-pyrrolo[2,3-b]pyridine (3n):

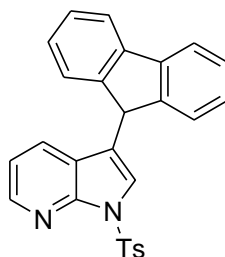

Compound **2n** (66 mg, 0.15 mmol) was treated with DDQ (0.19 mmol) in combination with anhydrous  $\text{FeCl}_3$  (5 mg, 0.03 mmol) and 4Å molecular sieves under argon atmosphere at 60 °C temperature as described for the synthesis of **3n** for 5 h to afford **3n** as a off white solid (44 mg, 0.10 mmol, 66%), The organic extract was dried over anhydrous  $\text{Na}_2\text{SO}_4$  and product was purified by column chromatography (silica gel, 60-120 mesh), eluting with pet ether/EtOAc 97:5 (v/v), m. p. 176-178 °C.  $^1\text{H}$  NMR ( $\text{CDCl}_3$ , 300 MHz)  $\delta$  2.38 (s, 3H), 5.21 (s, 1H), 6.75–6.84 (m, 2H), 7.20–7.31 (m, 6H), 7.38–7.43 (m, 2H), 7.84 (t,  $J$  = 4.2 Hz, 3H), 8.08–8.12 (m, 2H), 8.27 (dd,  $J$  = 1.8, 4.5 Hz, 1H). ppm.  $^{13}\text{C}$  NMR ( $\text{CDCl}_3$ , 100 MHz)  $\delta$  21.7, 46.0, 118.5, 118.6, 120.2, 121.7, 124.2, 125.2, 127.5, 127.9, 128.2, 128.7, 129.7, 135.6, 140.9, 145.0, 145.2, 145.6, 147.9 ppm. HRMS: caclcd for  $\text{C}_{27}\text{H}_{20}\text{N}_2\text{O}_2\text{S}$   $[\text{M}+\text{H}]^+$  437.1324; found 437.1322.

### 3-(9H-fluoren-9-yl)-5-methyl-1-tosyl-1H-pyrrolo[2,3-b]pyridine (3o):

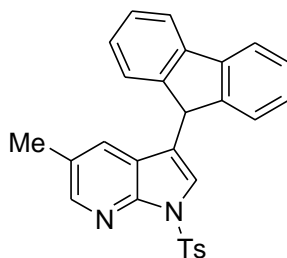

Compound **2o** (68 mg, 0.15 mmol) was treated with DDQ (0.19 mmol) in combination with anhydrous  $\text{FeCl}_3$  (5 mg, 0.03 mmol) and 4Å molecular sieves under argon atmosphere at 60 °C temperature as described for the synthesis of **3o** for 5 h to afford **3o** as a white solid (45 mg, 0.10 mmol, 68%), The organic extract was dried over anhydrous  $\text{Na}_2\text{SO}_4$  and product was purified by column chromatography (silica gel, 60-120 mesh), eluting with pet ether/EtOAc 97:5 (v/v), m. p. 194-196 °C.  $^1\text{H}$  NMR ( $\text{CDCl}_3$ , 400 MHz)  $\delta$  2.03 (s, 3H), 2.31 (s, 3H), 5.11 (s, 1H), 6.52 (s, 1H), 7.15–7.24 (m, 6H), 7.34 (t,  $J$  = 7.6 Hz, 2H), 7.68 (s, 1H), 7.77 (d,  $J$  = 7.6 Hz, 2H), 7.98–8.05 (m, 3H). ppm.  $^{13}\text{C}$  NMR ( $\text{CDCl}_3$ , 100 MHz)  $\delta$  18.4, 21.7, 46.0, 118.3, 120.2, 121.7, 124.4, 125.1, 127.5, 127.9, 128.0, 128.1, 128.6, 129.7, 135.7, 141.0, 145.0, 145.7, 145.9, 146.5 ppm. HRMS: caclcd for  $\text{C}_{28}\text{H}_{23}\text{N}_2\text{O}_2\text{SNa}$   $[\text{M}+\text{Na}]^+$  473.1300; found 473.1303.



## NMR data of compound 3-indolyl biphenyl ketone:

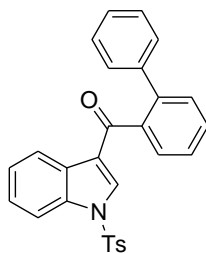

$^1\text{H}$  NMR ( $\text{CDCl}_3$ , 400 MHz)  $\delta$  2.38 (s, 3H), 7.14 (d,  $J$  = 7.2 Hz, 1H), 7.18–7.26 (m, 4H), 7.30 (dd,  $J$  = 3.2, 3.2 Hz, 2H), 7.37 (d,  $J$  = 7.2 Hz, 2H), 7.48–7.55 (m, 3H), 7.59 (d,  $J$  = 8.4 Hz, 3H), 7.62 (s, 1H), 7.75 (dd,  $J$  = 3.2, 2.4 Hz, 1H), 8.25 (dd,  $J$  = 2.8, 2.8 Hz, 1H) ppm.  $^{13}\text{C}$  NMR ( $\text{CDCl}_3$ , 100 MHz)  $\delta$  21.8, 112.9, 121.4, 123.0, 124.8, 125.7, 127.2, 127.3, 127.6, 127.8, 128.6, 128.9, 130.2, 130.3, 130.5, 130.6, 134.5, 134.7, 135.0, 139.9, 140.2, 140.5, 145.8, 193.5 ppm. HRMS: calcd for  $\text{C}_{28}\text{H}_{21}\text{NO}_3\text{SNa}$   $[\text{M}+\text{Na}]^+$  474.1140; found 474.1143.

## Two view of ortep diagram for the crystal structure of the compound 3a (Thermal ellipsoid contour at 50% probability level)

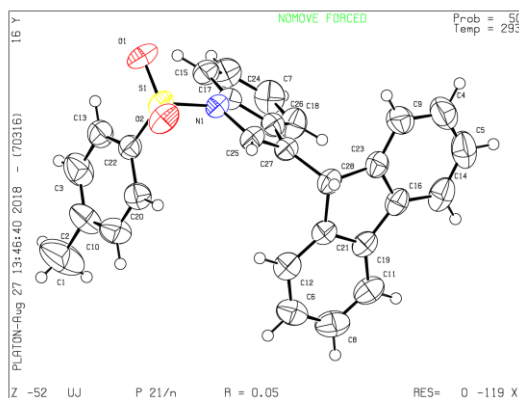

CCDC no.1964540

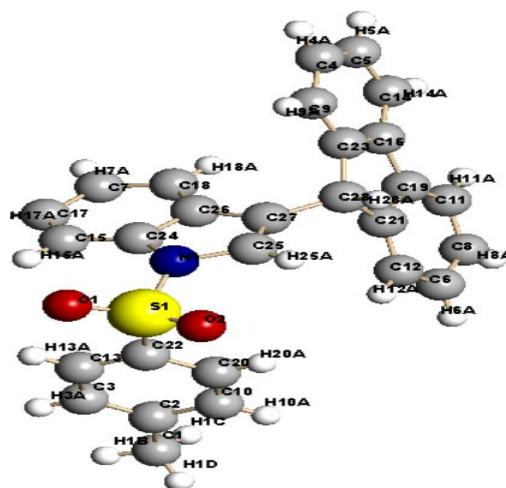

<sup>1</sup>H NMR of 1a, CDCl<sub>3</sub>, 300 MHz

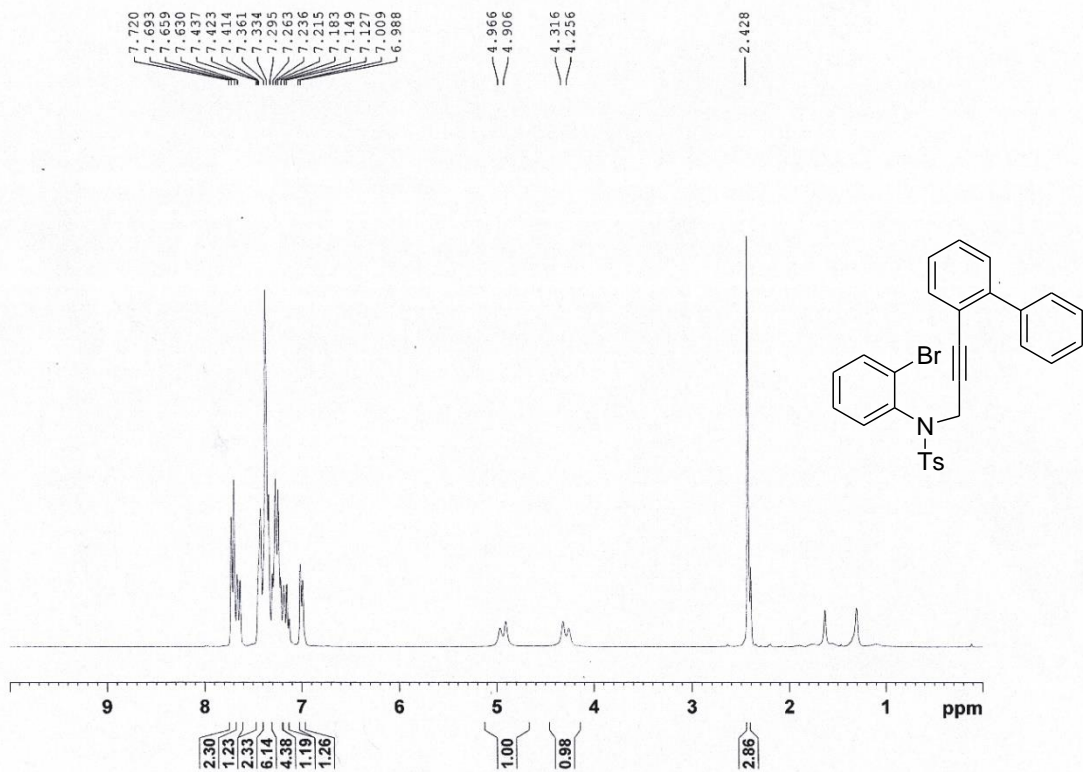

<sup>13</sup>C NMR of 1a, CDCl<sub>3</sub>, 75 MHz

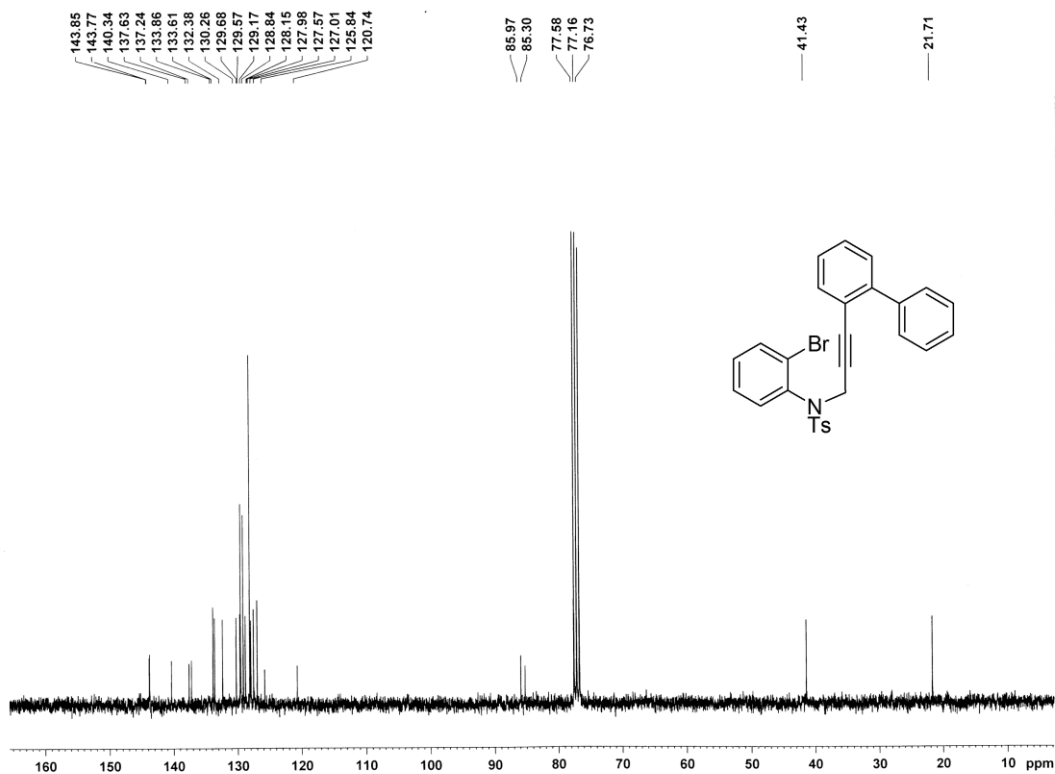

```

Current Data Parameters
NAME   SP-J-A-318A-11C
EXPNO  1
PROCNO 1

F2 Acquisition Parameters
Date_   20180216
Time    16.31
INSTRUM spect
PROBHD  5 mm PABBO BB-
PULPROG zgpg30
TD       32768
SOLVENT CDCl3
NS       195
DS       4
SWH      22727.273 Hz
FIDRES   0.493881 Hz
AQ        0.728892 sec
RG        210.78
TH        11.000 usec
CF        6.50 usec
TE        298.2 K
D1        2.0000000 sec
D11       0.0300000 sec
TDO       1

===== CHANNEL f1 =====
SFO1     75.473249 MHz
NUC1     13C
P1        8.20 usec
PLM1     34.00000000 W

===== CHANNEL f2 =====
SFO2     100.628100 MHz
NUC2     1H
CPCPRG2  waltz16
SFO3     30.000000 MHz
PLM2     6.99840021 W
PLM3     0.17450000 W
PLM4     0.14211001 W

F2 Processing parameters
SI        32768
SF        75.4677194 MHz
WDW       EM
SSB       0
LB        1.00 Hz
GB        0
PC        1.40
    
```

**<sup>1</sup>H NMR of 2a, CDCl<sub>3</sub>, 400 MHz**

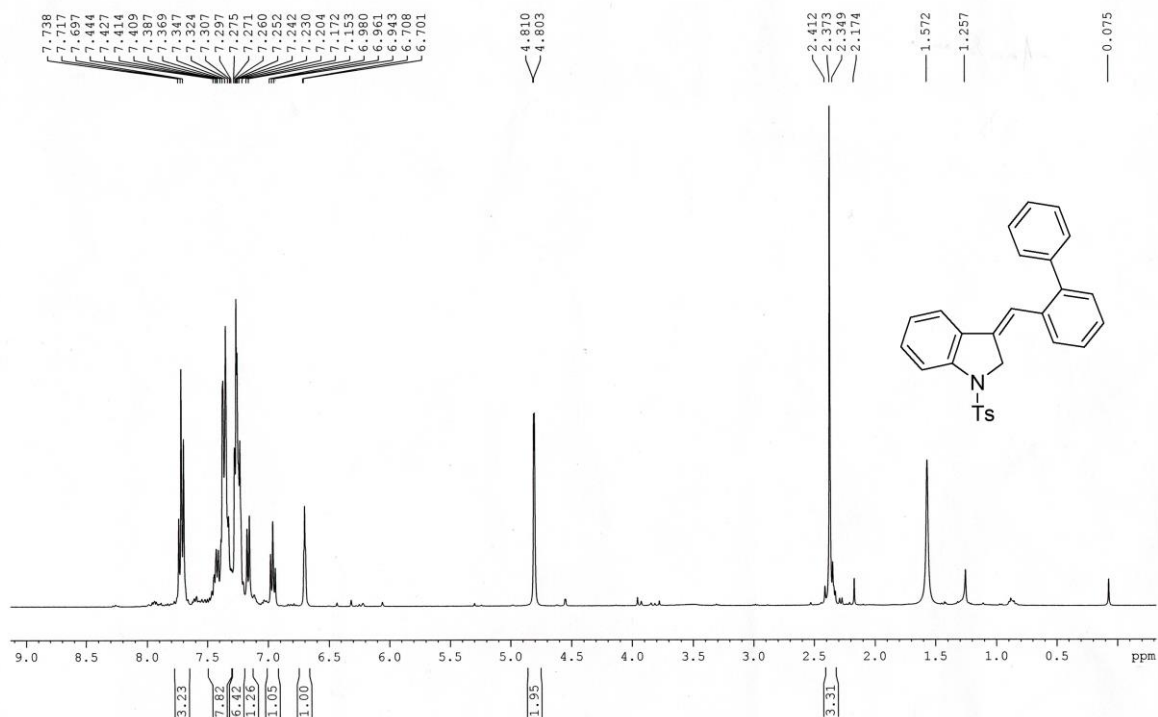

**<sup>13</sup>C NMR of 2a, CDCl<sub>3</sub>, 100 MHz**

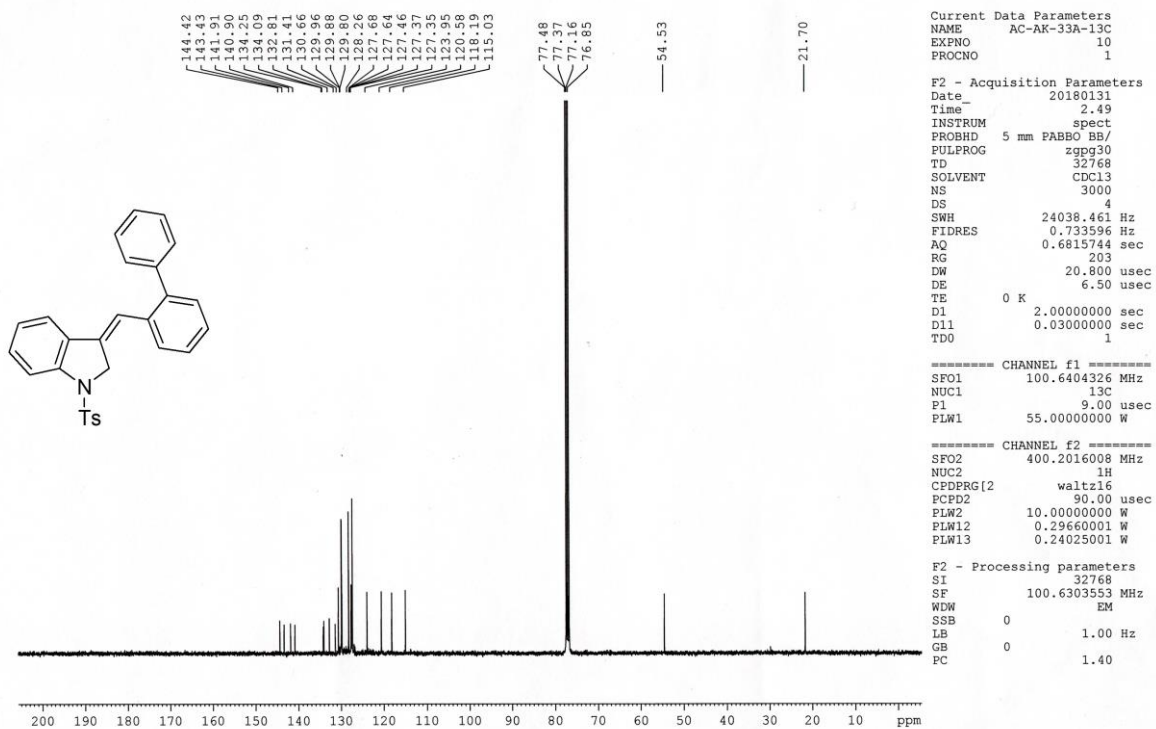

<sup>1</sup>H NMR of 2b, CDCl<sub>3</sub>, 500 MHz

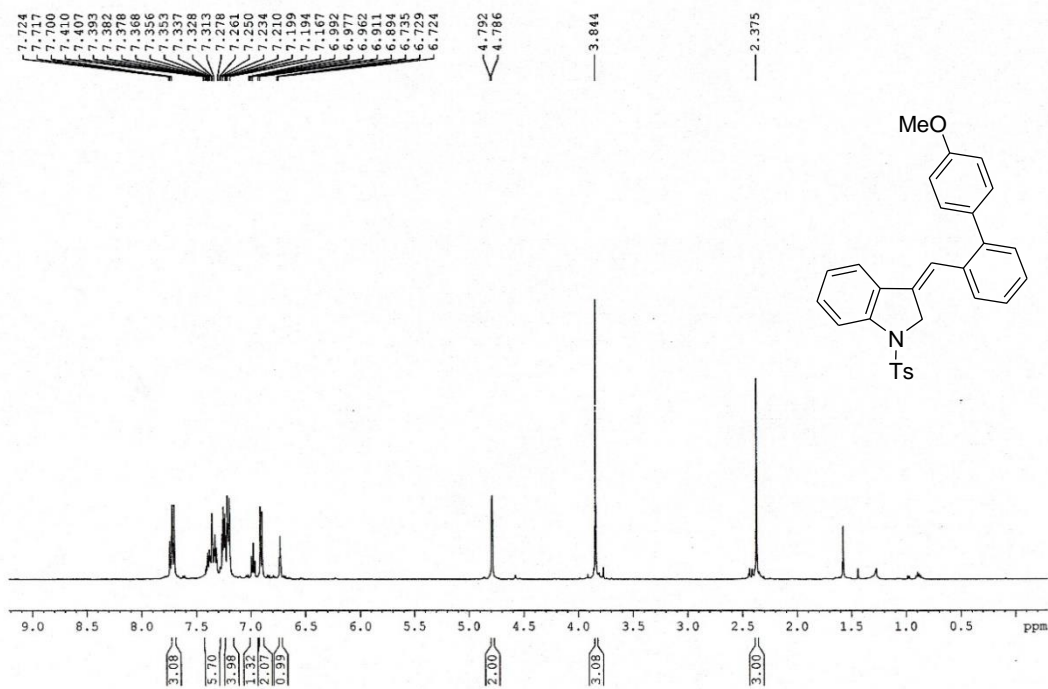

<sup>13</sup>C NMR of 2b, CDCl<sub>3</sub>, 100 MHz

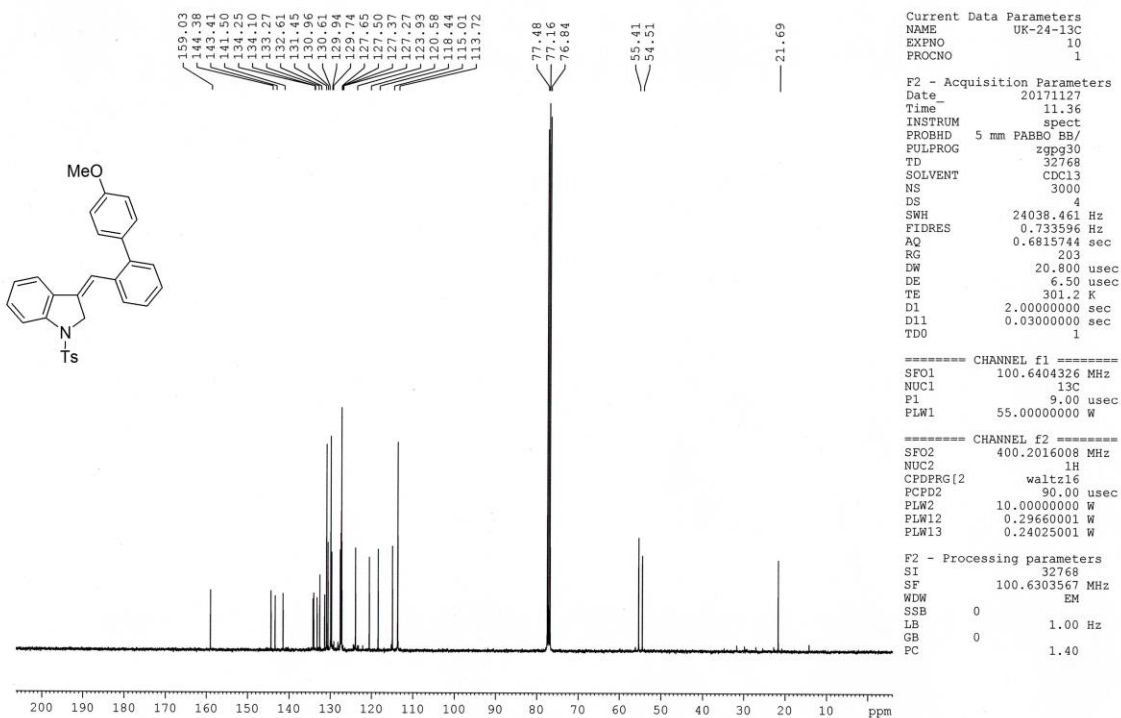

<sup>1</sup>H NMR of 2c, CDCl<sub>3</sub>, 400 MHz

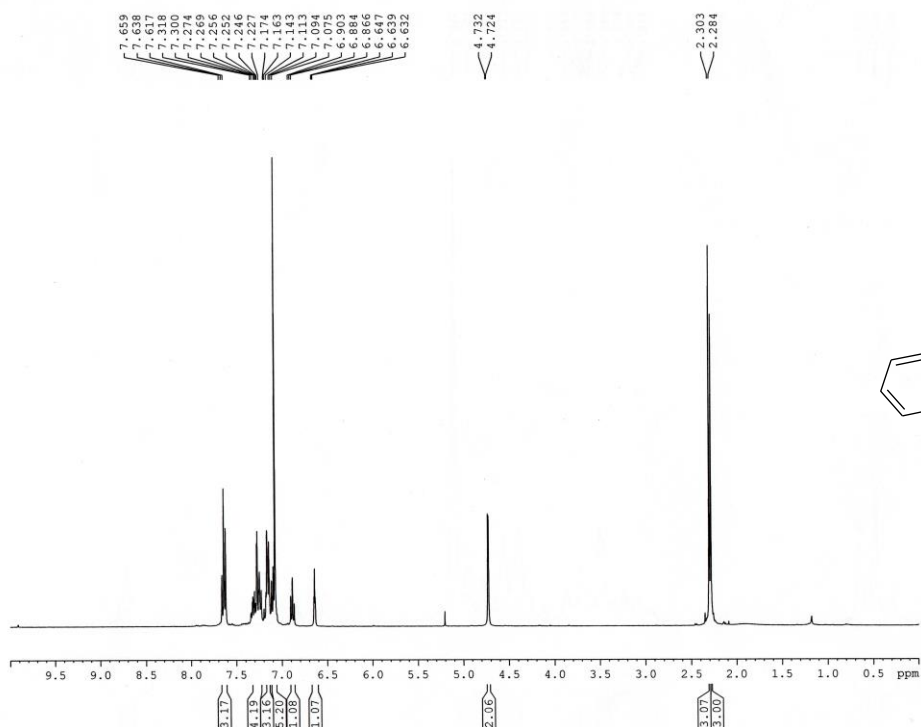

<sup>13</sup>C NMR of 2c, CDCl<sub>3</sub>, 100 MHz

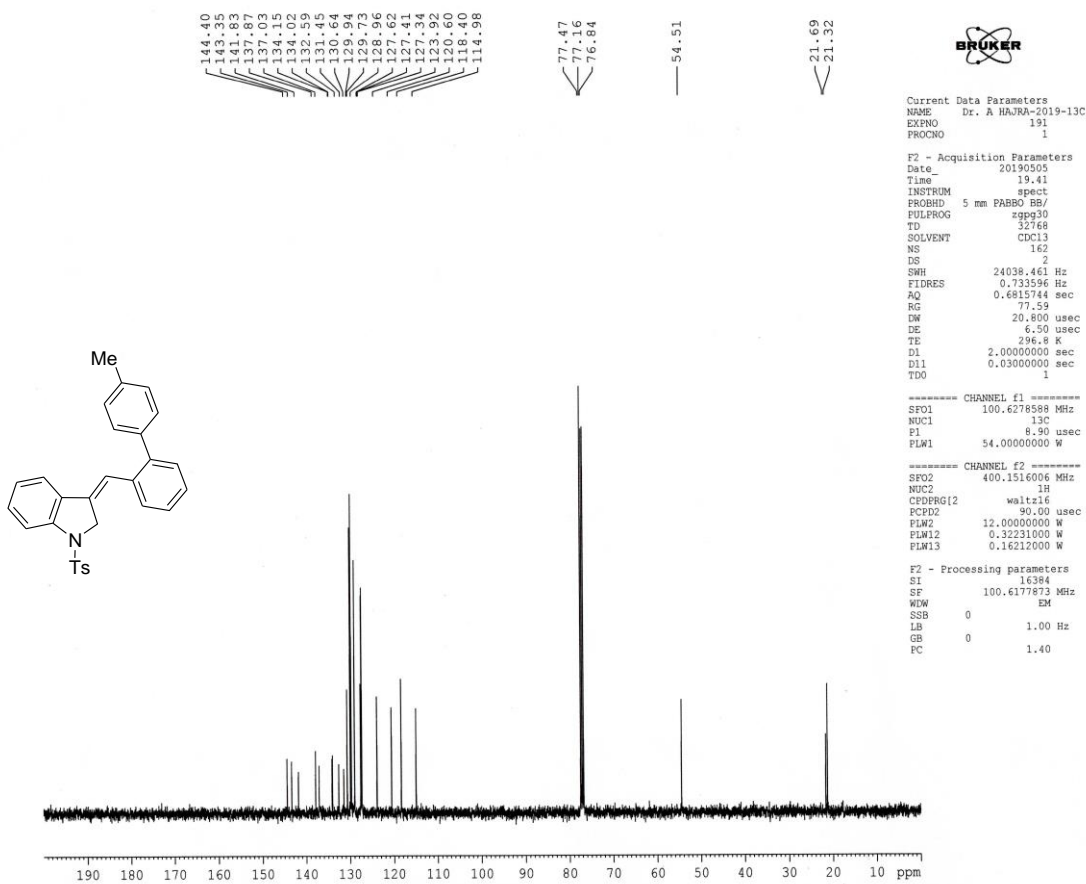

**<sup>1</sup>H NMR of 2d, CDCl<sub>3</sub>, 400 MHz**

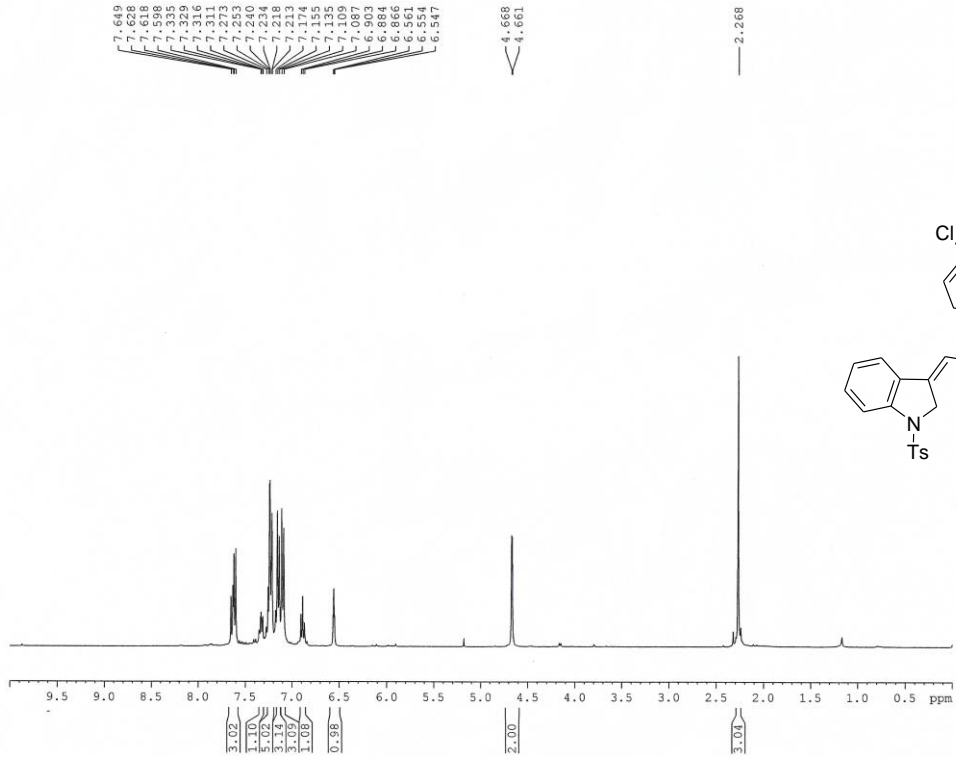

**<sup>13</sup>C NMR of 2d, CDCl<sub>3</sub>, 100 MHz**

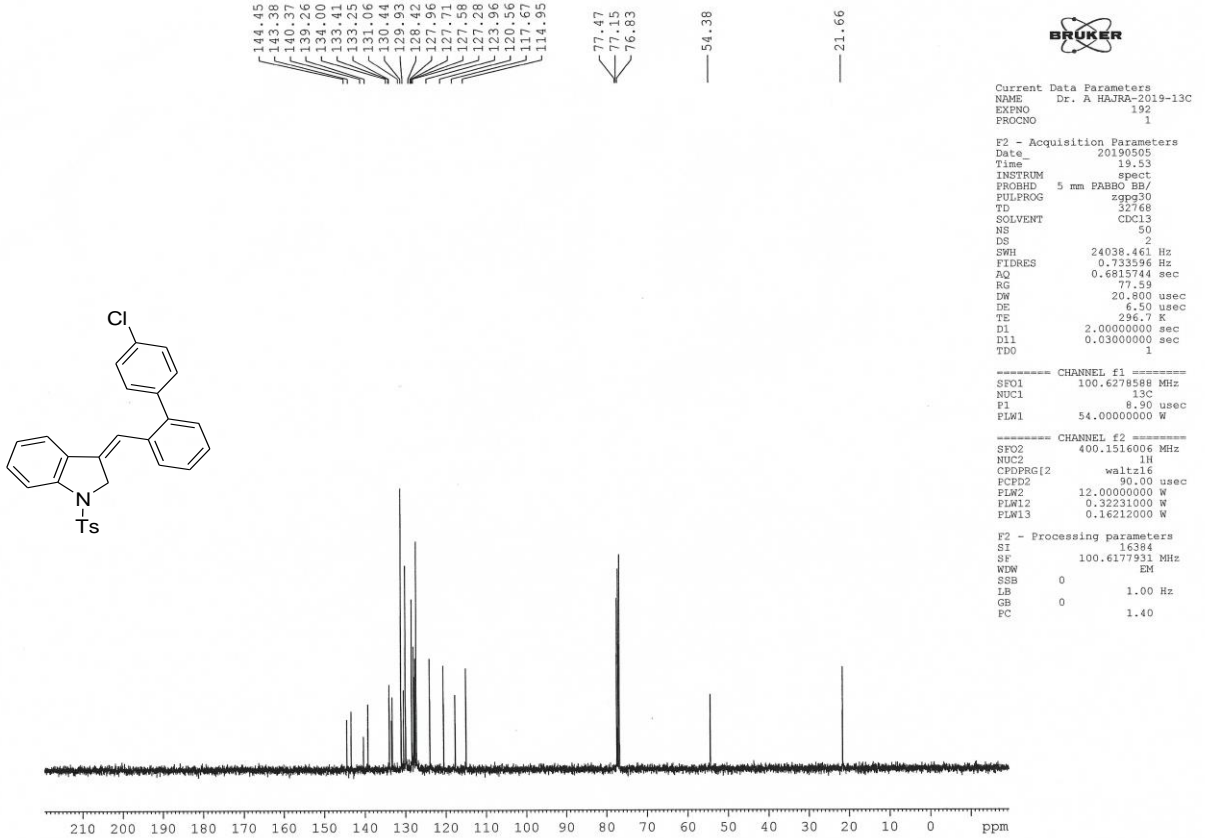



<sup>1</sup>H NMR of 2e, CDCl<sub>3</sub>, 300 MHz

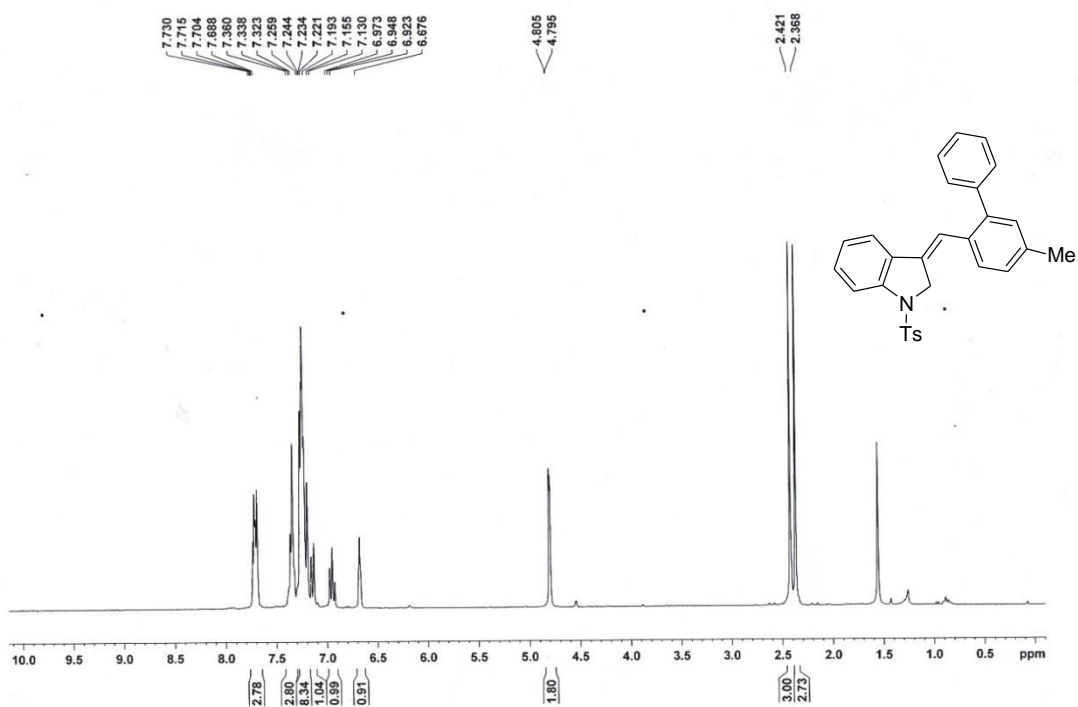

<sup>13</sup>C NMR of 2e, CDCl<sub>3</sub>, 75 MHz

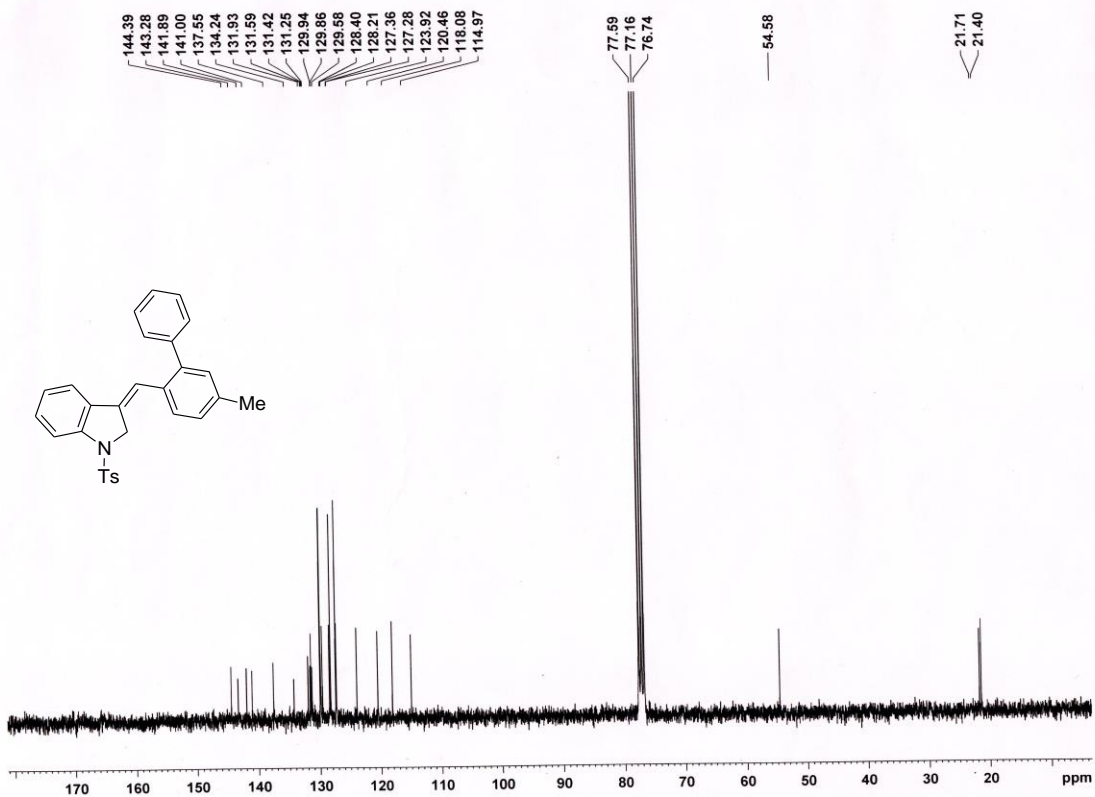

```

Current Data Parameters
NAME      SP-J-A-49-R-13C
EXPRO    1
PROCNO   1

F2 - Acquisition Parameters
Date_    20180511
Time     15.11
INSTRUM  spect
PROBHD   5 mm PABBO BB-
PULPROG  zgpg30
TD       32768
SOLVENT  CDCl3
NS       1654
DS       4
SWH      19531.250 Hz
FIDRES   0.596046 Hz
AQ       0.5388608 sec
RG       210.78
DW       25.600 usec
DE       6.50 usec
TE       299.5 K
D1       2.0000000 sec
D11      0.0300000 sec
TD0      1

***** CHANNEL f1 *****
SF01     75.4759307 MHz
NUC1     13C
P1       9.25 usec
PLW1     34.0000000 W

***** CHANNEL f2 *****
SF02     300.1312005 MHz
NUC2     1H
CPEPRG[2]  waltz16
PCPD2    30.00 usec
PLW2     6.99840021 W
PLW12    0.17545000 W
PLW13    0.14211001 W

F2 - Processing parameters
SI       32768
SF       75.4677380 MHz
KRM      SQ
SSB      0
LB       1.00 Hz
GB       0
PC       1.40
    
```

<sup>13</sup>C NMR expansion of 2e, CDCl<sub>3</sub>, 75 MHz

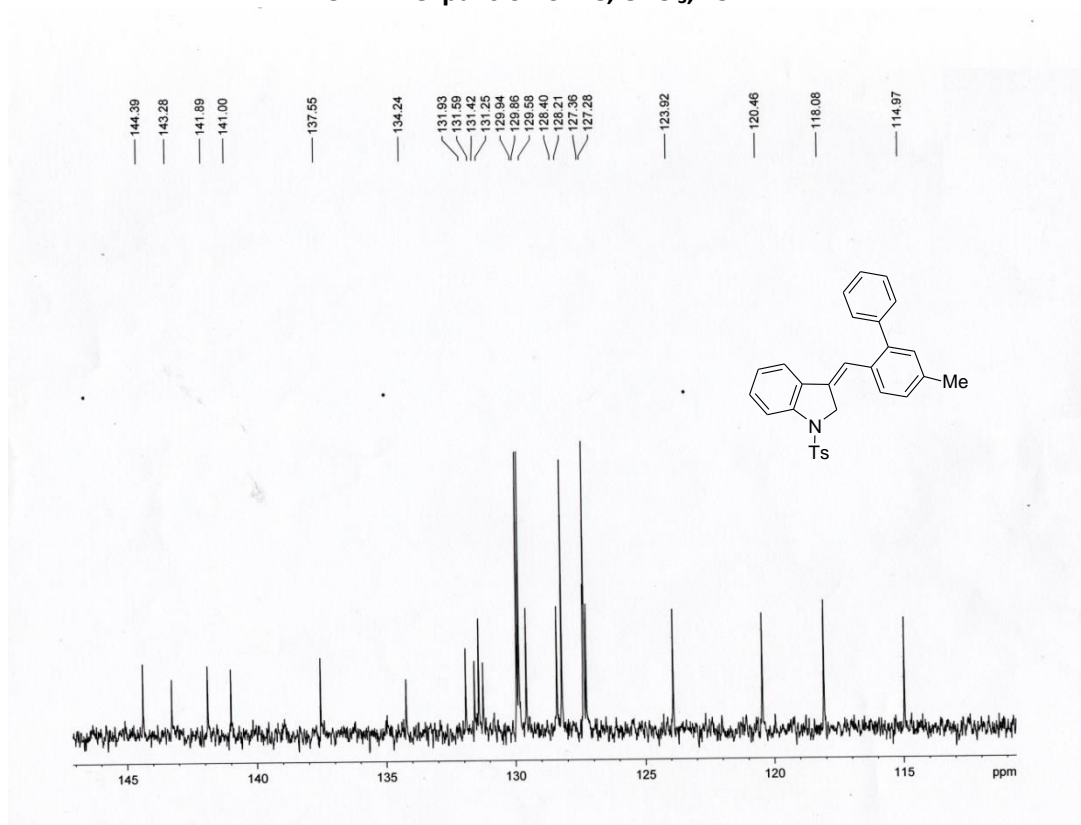

<sup>1</sup>H NMR of 2f, CDCl<sub>3</sub>, 400 MHz

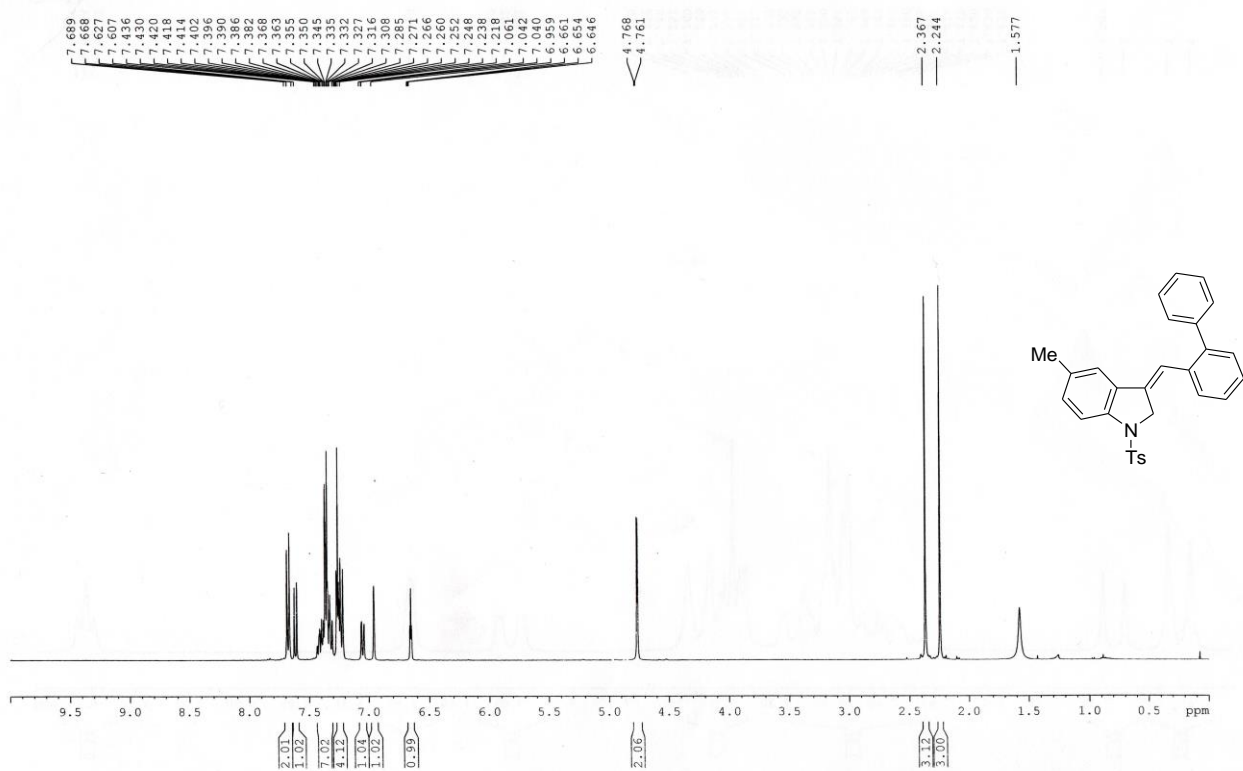



### <sup>13</sup>C NMR of 2f, CDCl<sub>3</sub>, 300 MHz

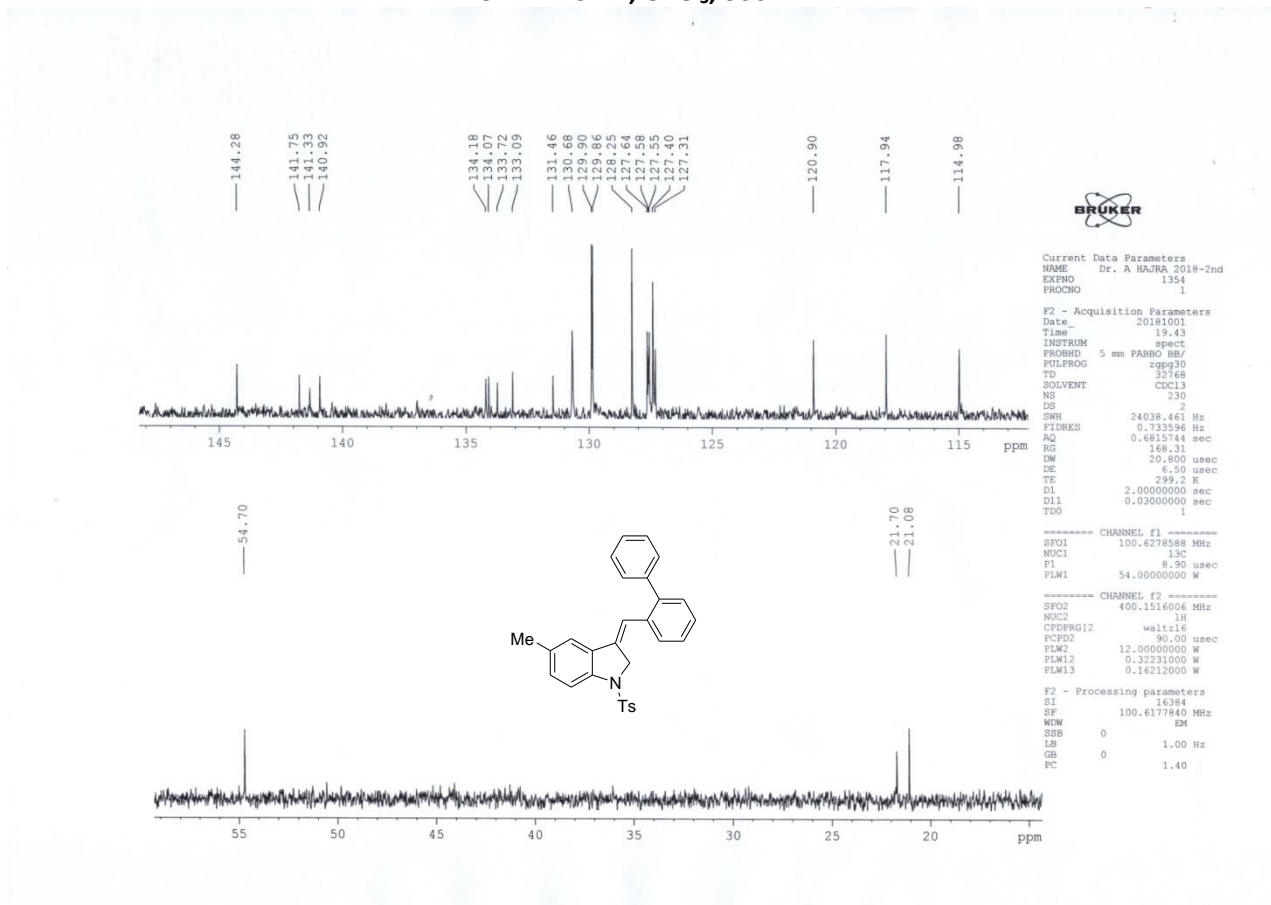

### <sup>1</sup>H NMR of 2g, CDCl<sub>3</sub>, 400 MHz

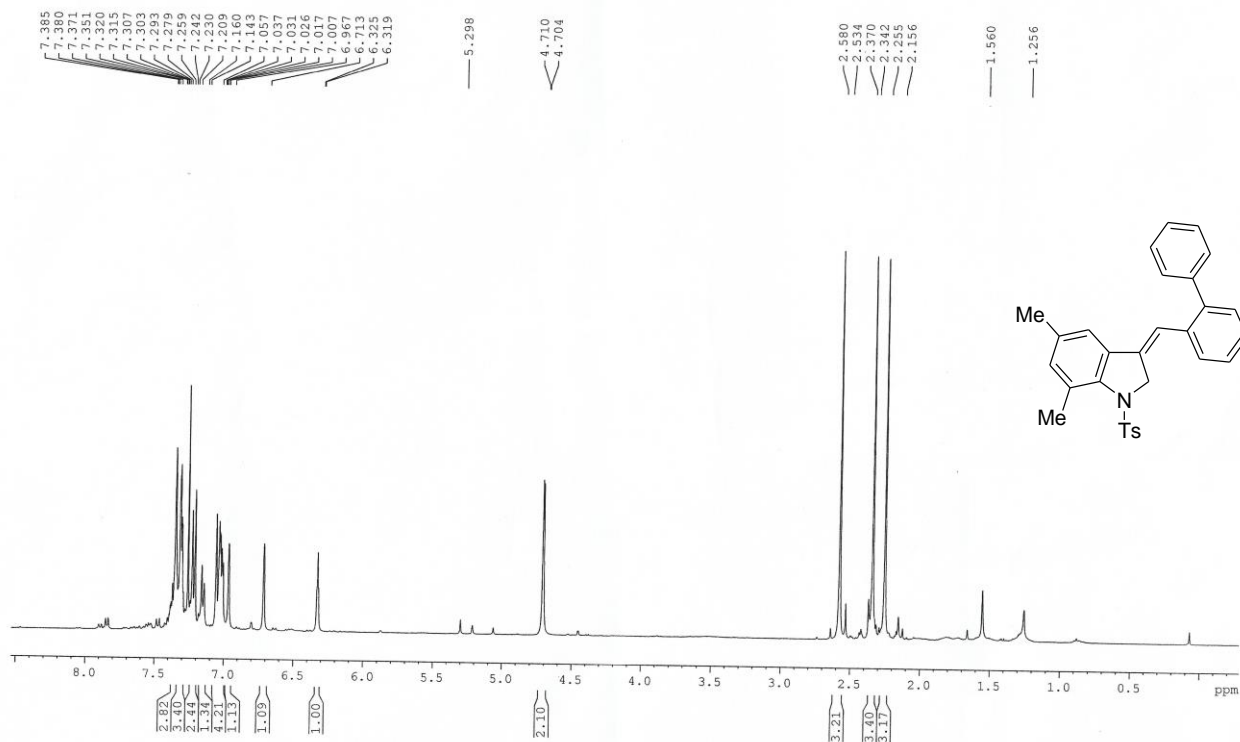

### <sup>13</sup>C NMR of 2g, CDCl<sub>3</sub>, 100 MHz

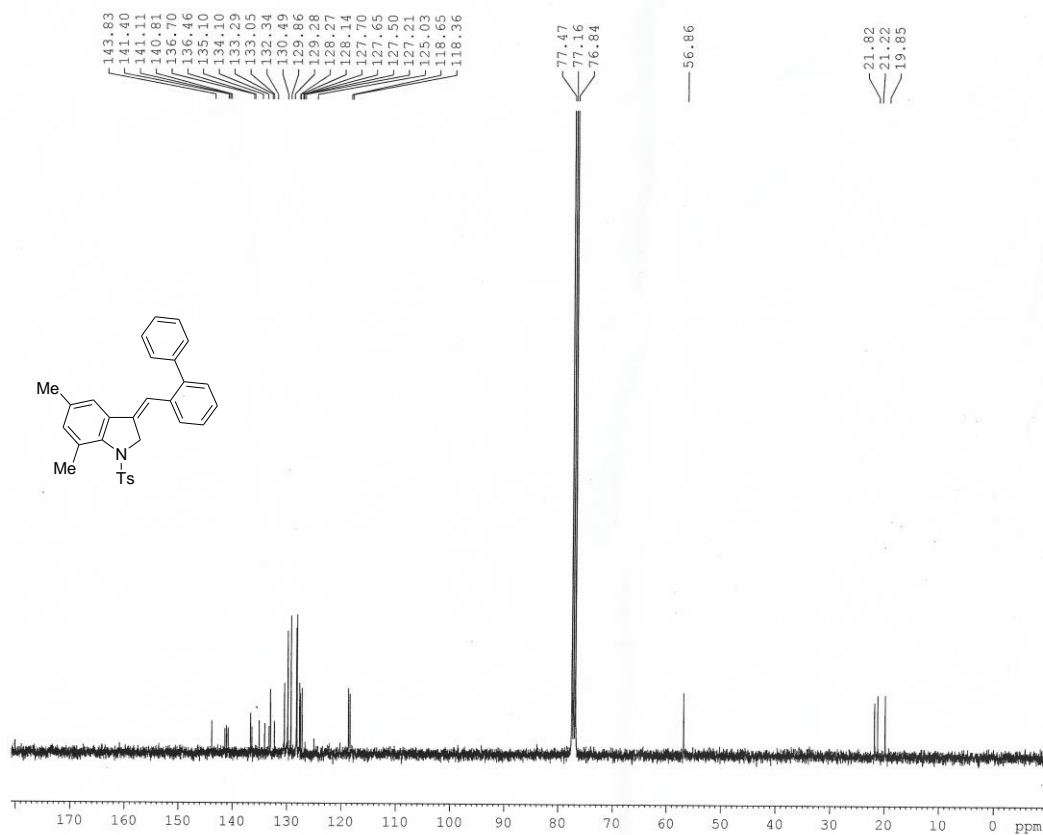

Current Data Parameters  
NAME BCR-SJ-AK-96-13C  
EXPNO 10  
PROCNO 1

F2 - Acquisition Parameters  
Date\_ 20181011  
Time 17.38  
INSTRUM spect  
PROBHD 5 mm PABBO BB/  
PULPROG zgpg30  
TD 32768  
SOLVENT CDCl3  
NS 1656  
DS 4  
SWH 24038.461 Hz  
FIDRES 0.733596 Hz  
AQ 0.6815744 sec  
RG 203  
DW 20.800 usec  
DE 6.50 usec  
TE 0 K  
D1 2.0000000 sec  
D11 0.0300000 sec  
TDO 1

----- CHANNEL f1 -----  
SFO1 100.6404326 MHz  
NUC1 13C  
P1 11.00 usec  
PLW1 55.00000000 W  
----- CHANNEL f2 -----  
SFO2 400.2016008 MHz  
NUC2 1H  
CDEPRG2 waltz16  
PCPD2 90.00 usec  
PLW2 10.00000000 W  
PLW12 0.36736000 W  
PLW13 0.29756001 W

F2 - Processing parameters  
SI 32768  
SF 100.6303531 MHz  
WDW EM  
SSB 0  
LB 1.00 Hz  
GB 0  
PC 1.40

### <sup>13</sup>C NMR expansion of 2g, CDCl<sub>3</sub>, 100 MHz

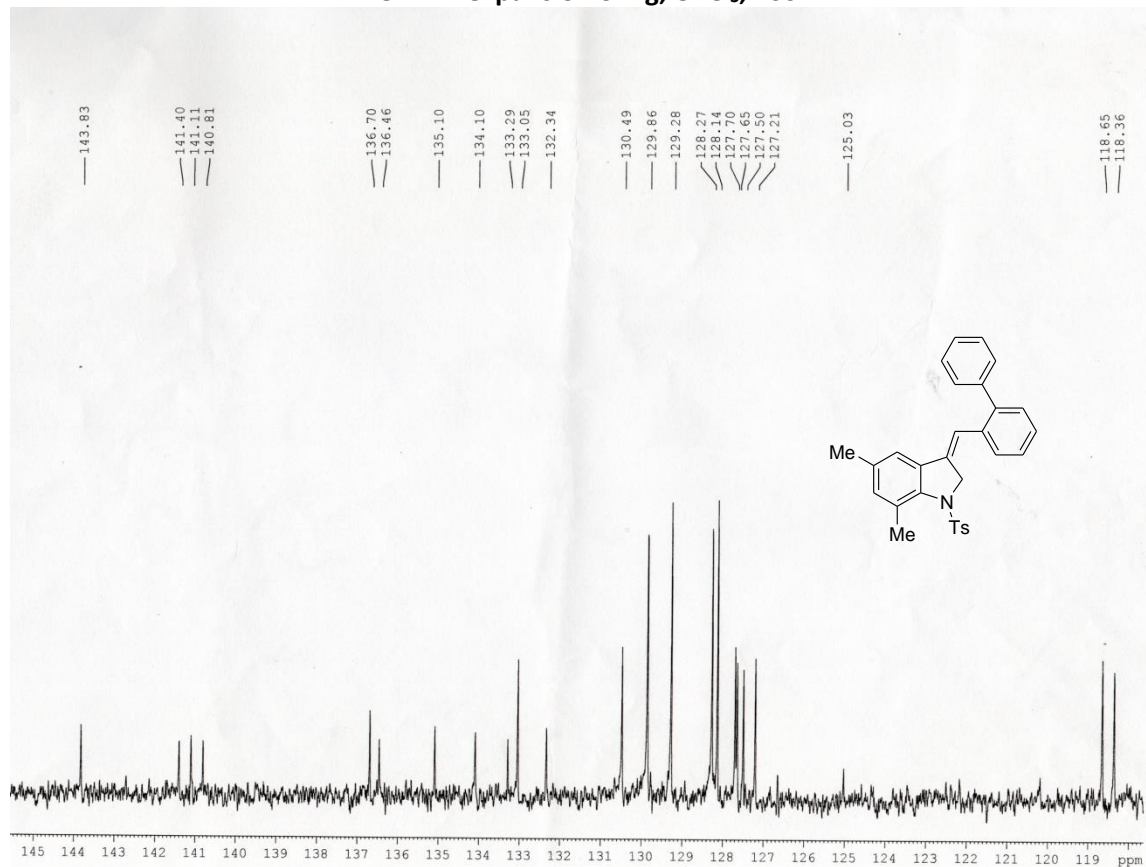

<sup>1</sup>H NMR of 2h, CDCl<sub>3</sub>, 400 MHz

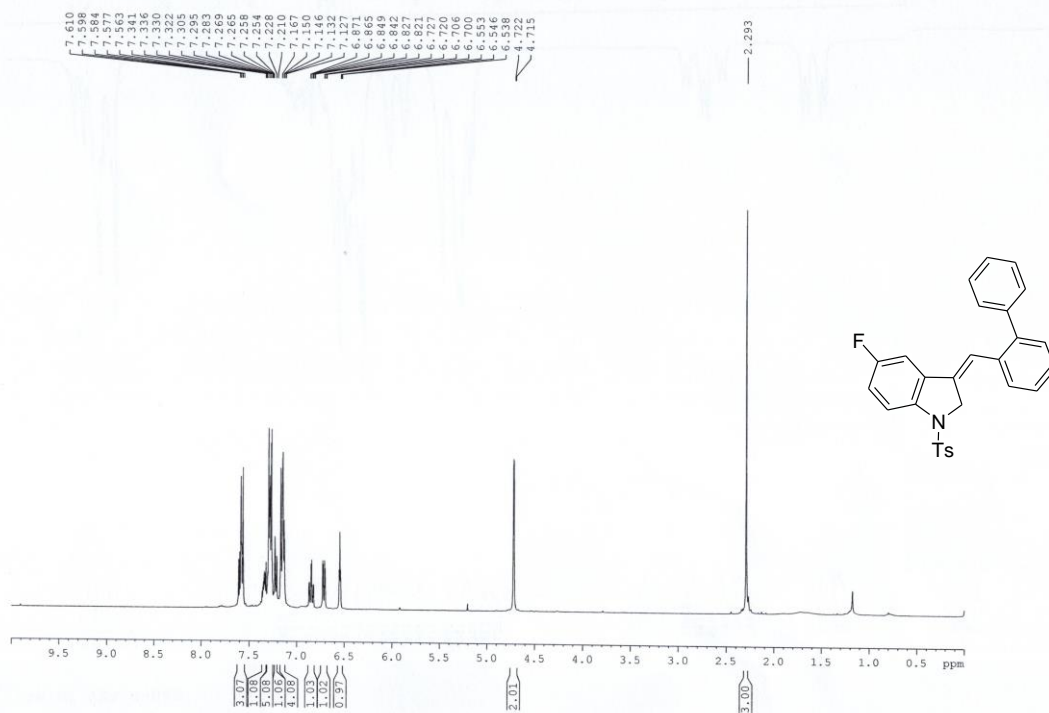

<sup>13</sup>C NMR of 2h, CDCl<sub>3</sub>, 100 MHz

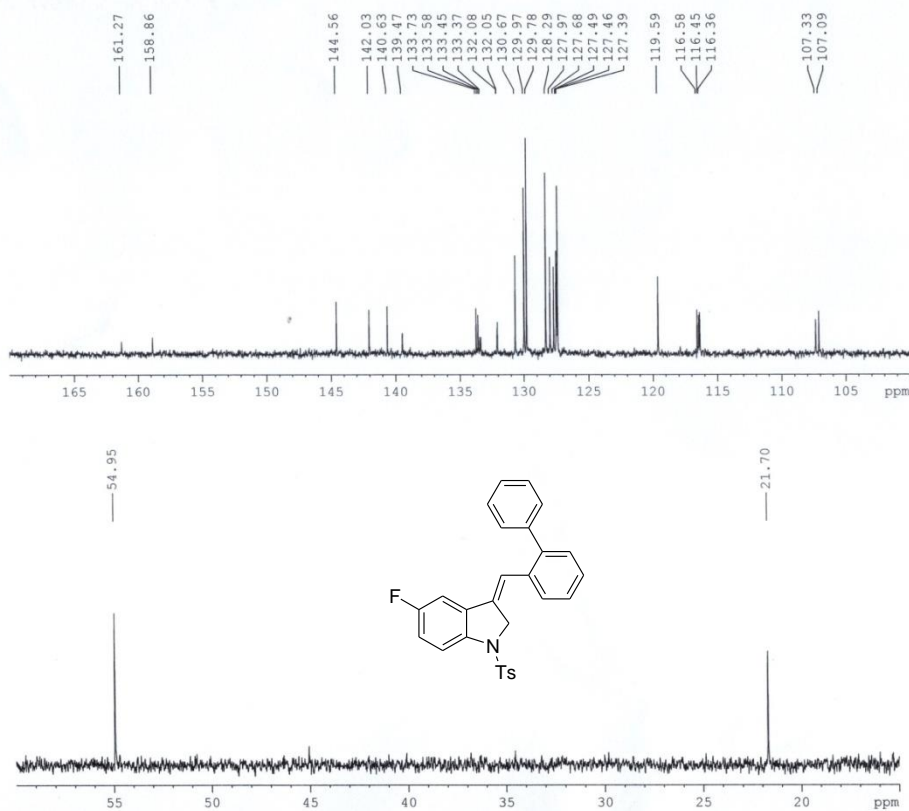

Current Data Parameters  
 NAME Dr. A HAJRA-2019-13C  
 EXNO 194  
 PROCNO 1

F2 - Acquisition Parameters  
 Date 20190506  
 Time 10.20  
 INSTRUM spect  
 PROBHD 5 mm FBBBO BB/  
 FULPROG zgpg30  
 TD 32768  
 SOLVENT CDCl3  
 NS 140  
 DS 2  
 SFR 24038.461 Hz  
 FIDRES 0.733596 Hz  
 AQ 0.6815744 sec  
 RG 186.42  
 DW 20.800 usec  
 DE 6.50 usec  
 TE 298.1 K  
 D1 2.0000000 sec  
 D11 0.0300000 sec  
 TDO 1

----- CHANNEL f1 -----  
 SFO1 100.627858 MHz  
 NUC1 13C  
 P1 8.90 usec  
 PLW1 54.0000000 W

----- CHANNEL f2 -----  
 SFO2 400.1516006 MHz  
 NUC2 1H  
 CPDPRG2 waltz16  
 PCPD2 90.00 usec  
 PLW2 12.0000000 W  
 PLW12 0.32231000 W  
 PLW13 0.16212000 W

F2 - Processing parameters  
 SI 16384  
 SF 100.6177873 MHz  
 WMW EM  
 SSB 0 1.00 Hz  
 LB 0  
 GB 0  
 PC 1.40

**<sup>1</sup>H NMR of 2i, CDCl<sub>3</sub>, 400 MHz**

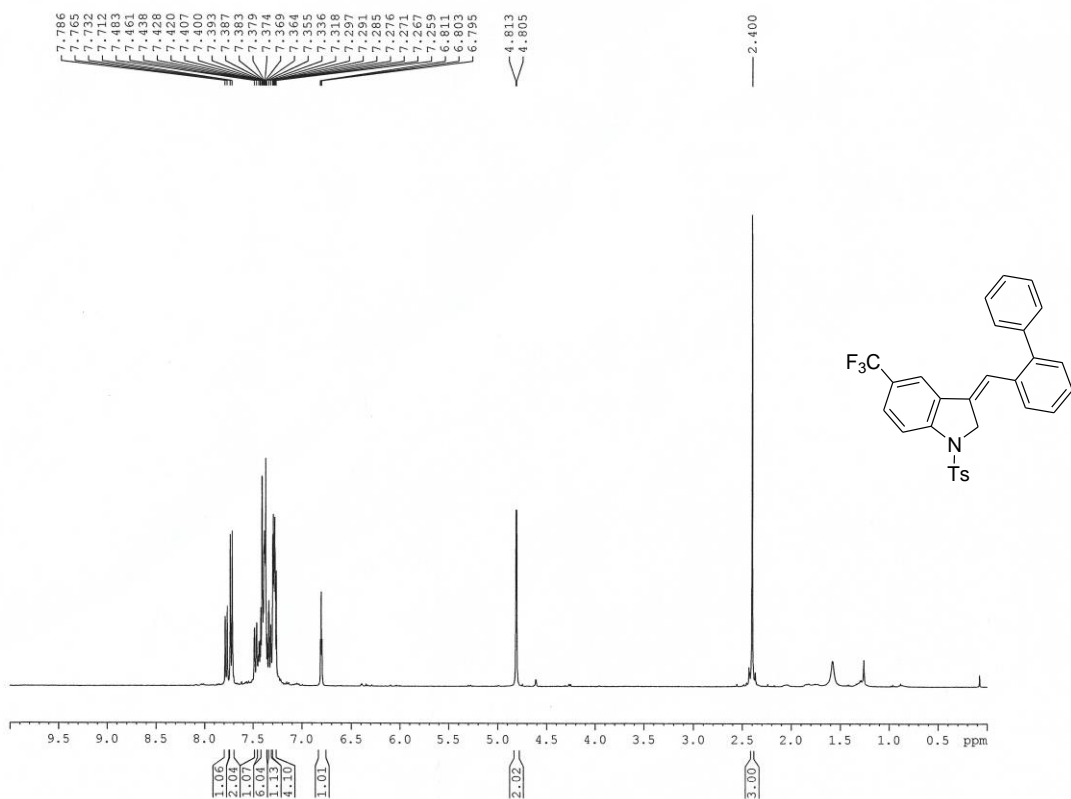

**<sup>13</sup>C NMR of 2i, CDCl<sub>3</sub>, 100 MHz**

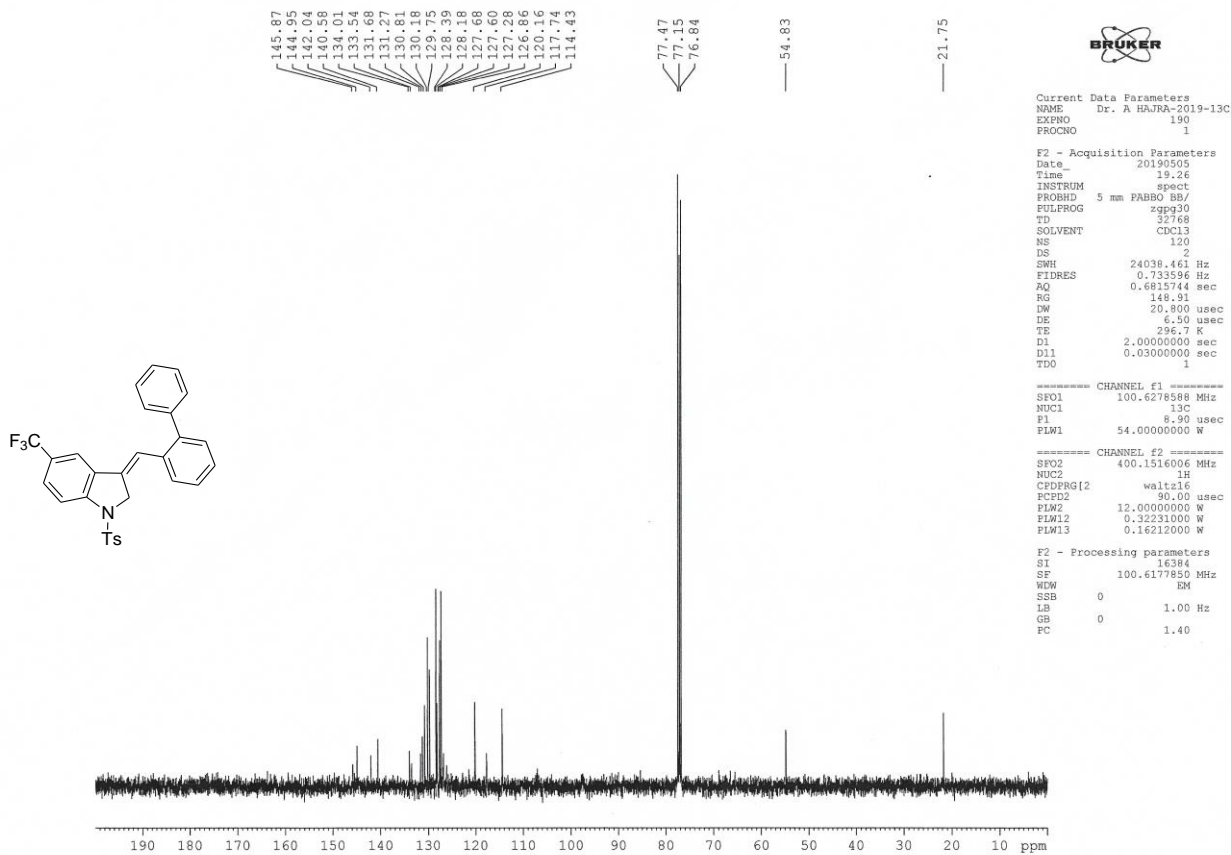

### <sup>1</sup>H NMR of 2j, CDCl<sub>3</sub>, 400 MHz

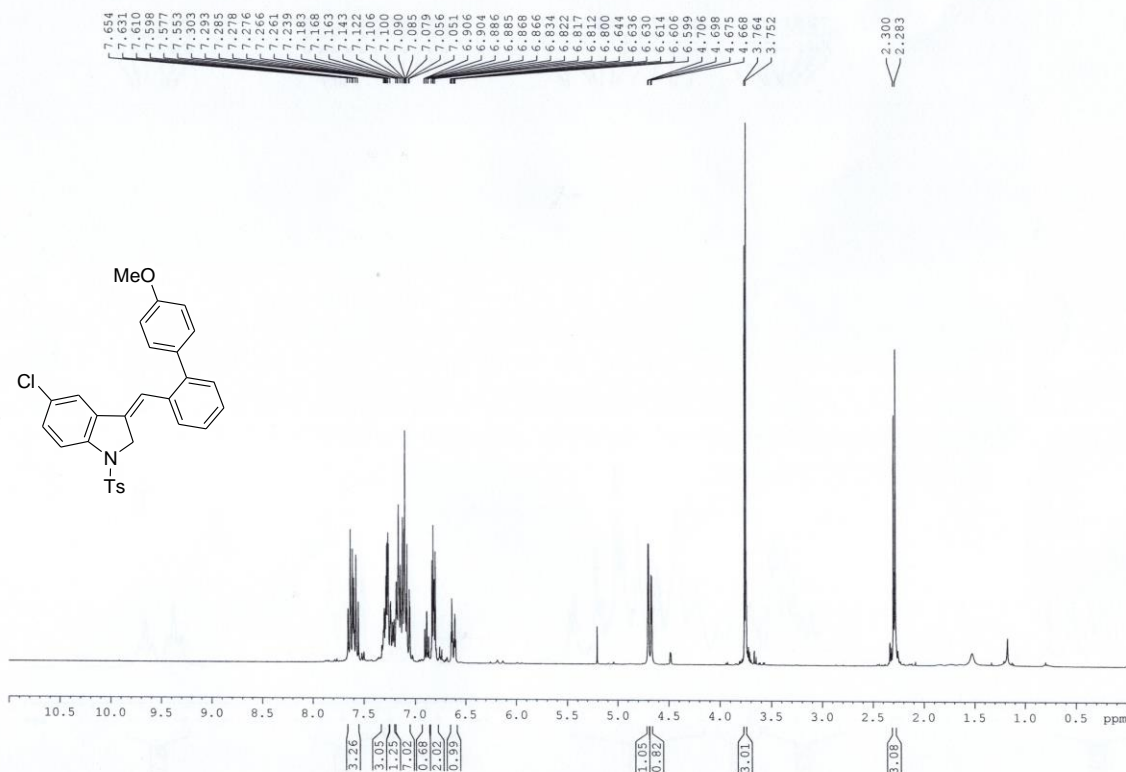

### <sup>13</sup>C NMR of 2j, CDCl<sub>3</sub>, 100 MHz

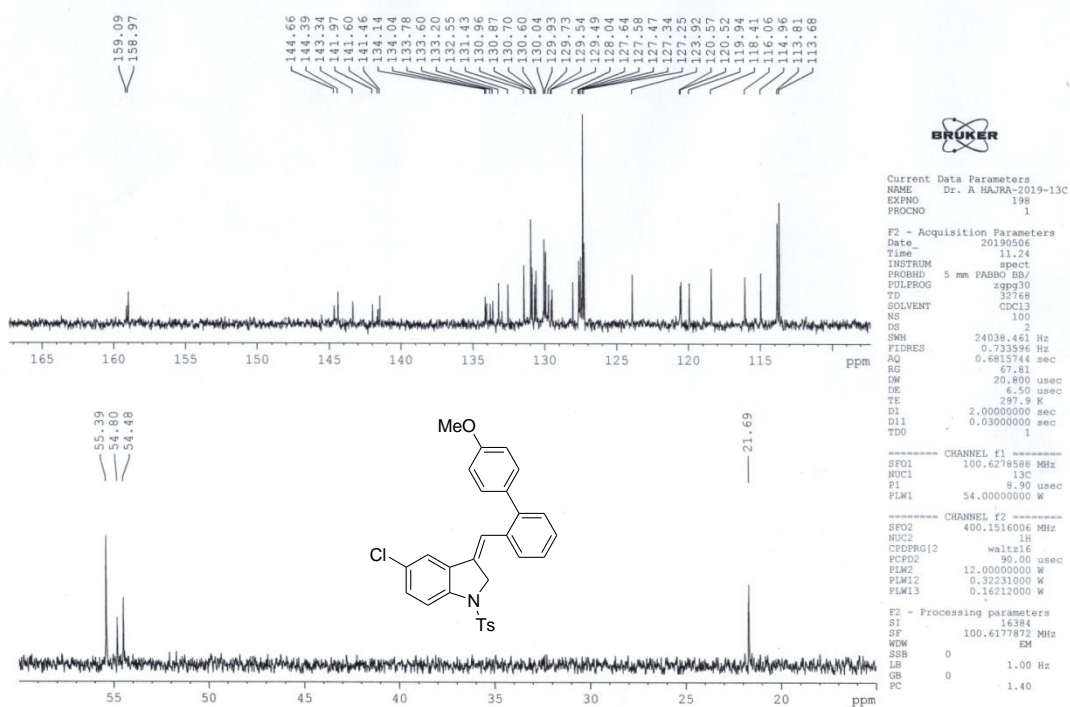



<sup>1</sup>H NMR of 2k, CDCl<sub>3</sub>, 400 MHz

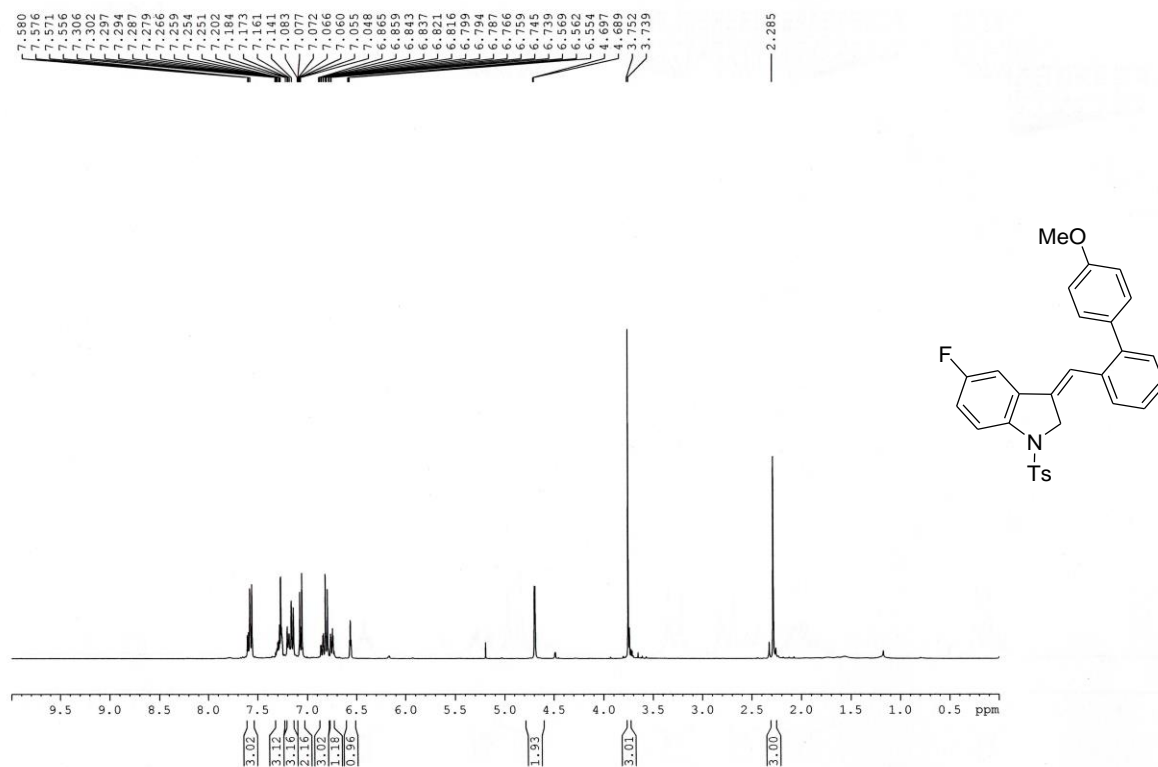

<sup>13</sup>C NMR of 2k, CDCl<sub>3</sub>, 100 MHz

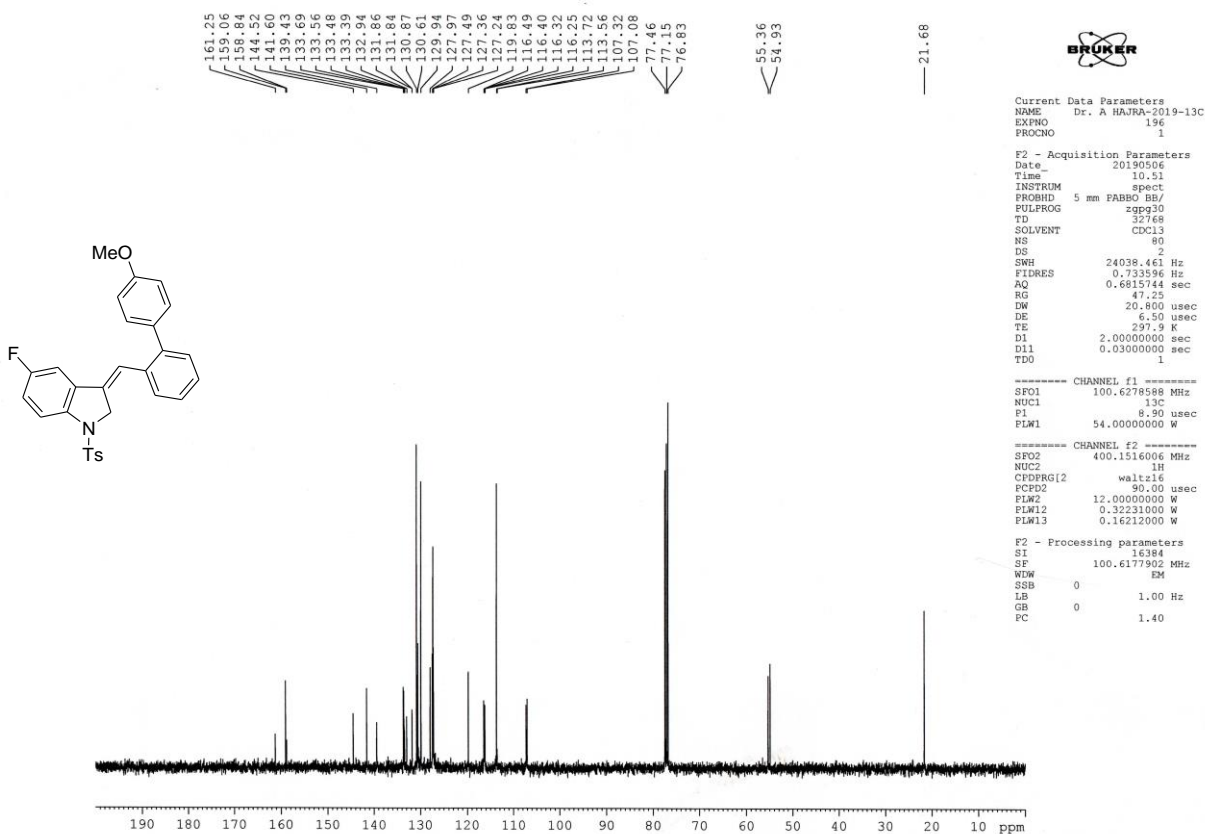

<sup>13</sup>C NMR expansion of 2k, CDCl<sub>3</sub>, 100 MHz

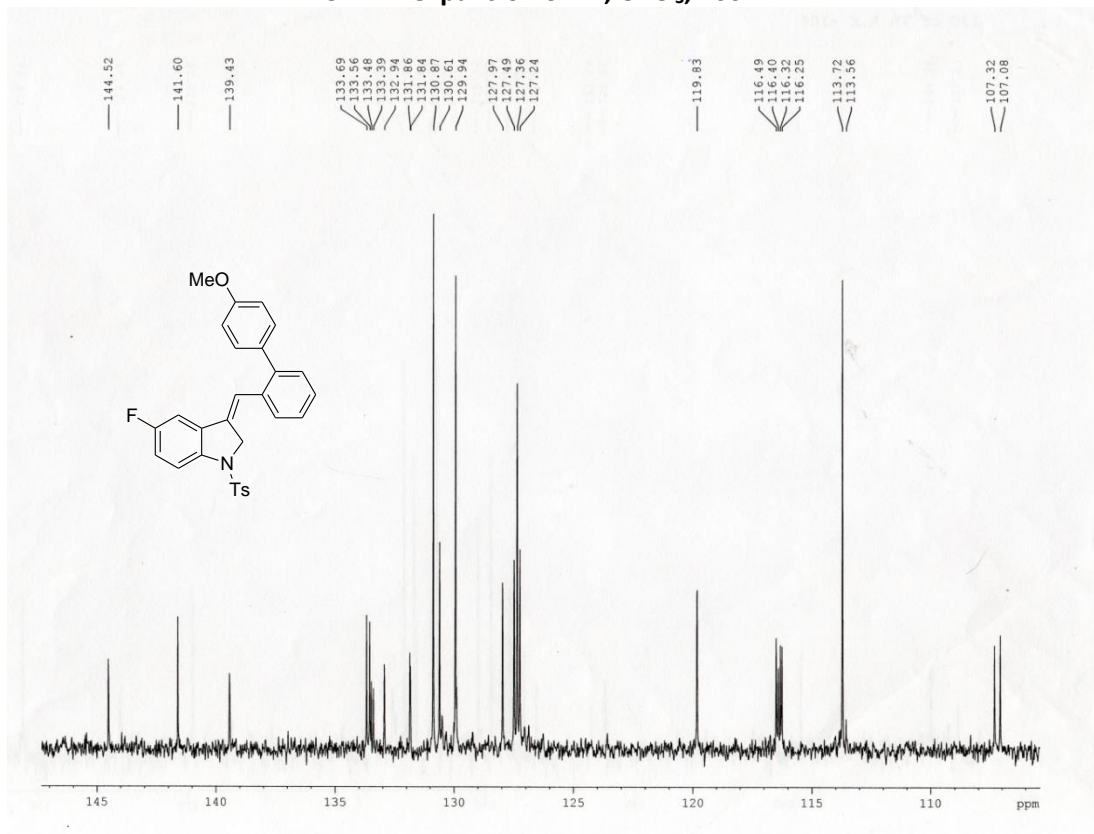

<sup>1</sup>H NMR of 2l, CDCl<sub>3</sub>, 400 MHz

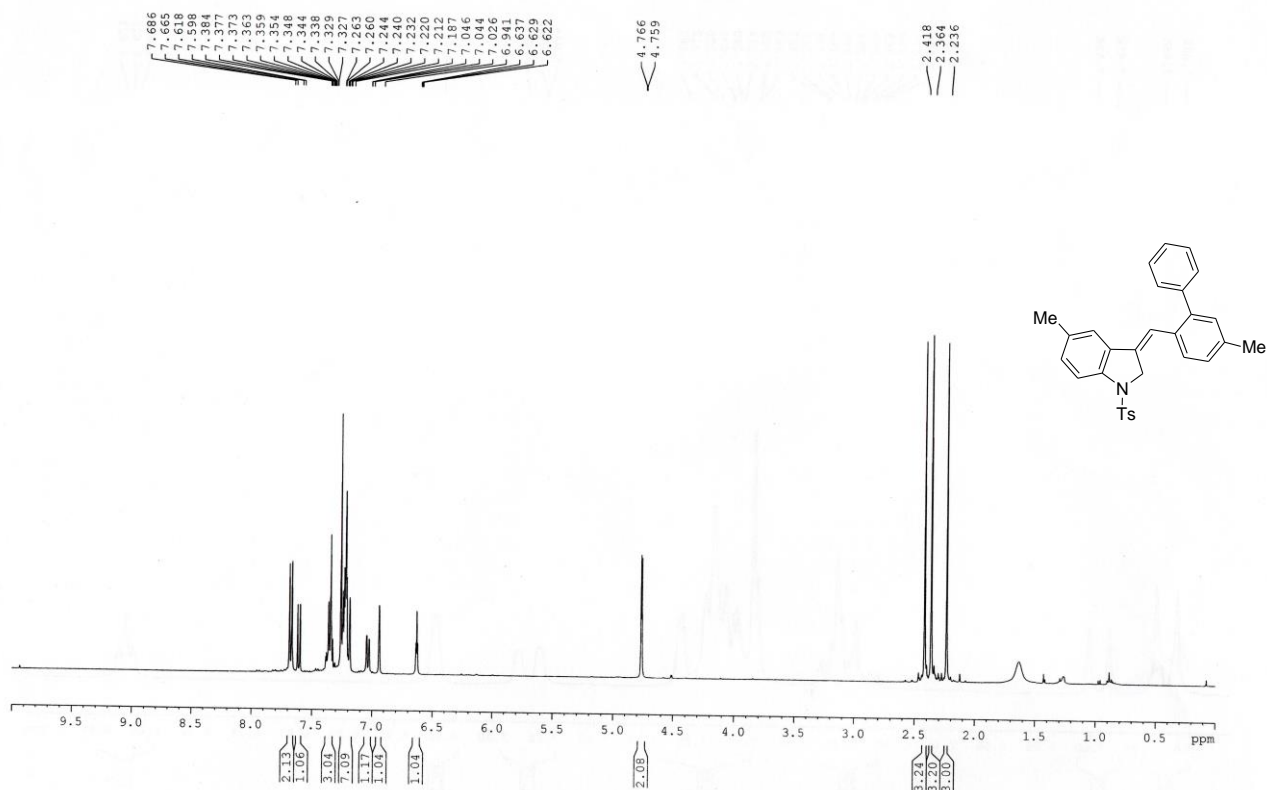

**<sup>13</sup>C NMR of 2l, CDCl<sub>3</sub>, 100 MHz**

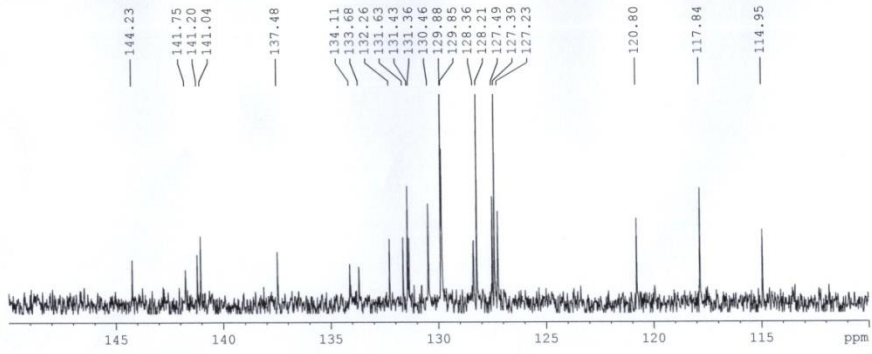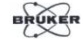

Current Data Parameters  
 NAME Dr. A HAJRA 2018-2nd  
 EXPNO 136  
 PROCNO 1

F2 - Acquisition Parameters  
 Date 20181001  
 Time 20.03  
 INSTRUM spect  
 PROBHD 5 mm PABBO BB/  
 PULPROG zgpg30  
 TD 32768  
 SOLVENT CDCl3  
 NS 280  
 DS 2  
 SWH 24038.461 Hz  
 FIDRES 0.733596 Hz  
 AQ 0.6815744 sec  
 RG 168.31  
 DW 20.800 usec  
 DE 6.50 usec  
 TE 299.2 K  
 D1 2.00000000 sec  
 D11 0.03000000 sec  
 TDO 1

CHANNEL f1  
 SF01 100.6278588 MHz  
 NUC1 13C  
 P1 8.90 usec  
 PLW1 54.00000000 W

CHANNEL f2  
 SF02 400.1516006 MHz  
 NUC2 1H  
 CPDPRG2 waltz16  
 PCPD2 90.00 usec  
 PLW2 12.00000000 W  
 PLW12 0.32231000 W  
 PLW13 0.16212000 W

F2 - Processing parameters  
 SI 16384  
 SF 100.6177841 MHz  
 WDW EM  
 SSB 0  
 LB 1.00 Hz  
 GB 0  
 PC 1.40

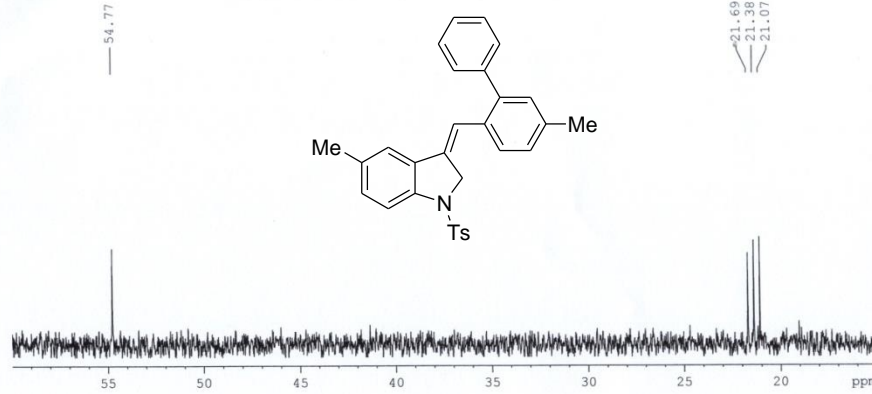

**<sup>1</sup>H NMR of 2m, CDCl<sub>3</sub>, 500 MHz**

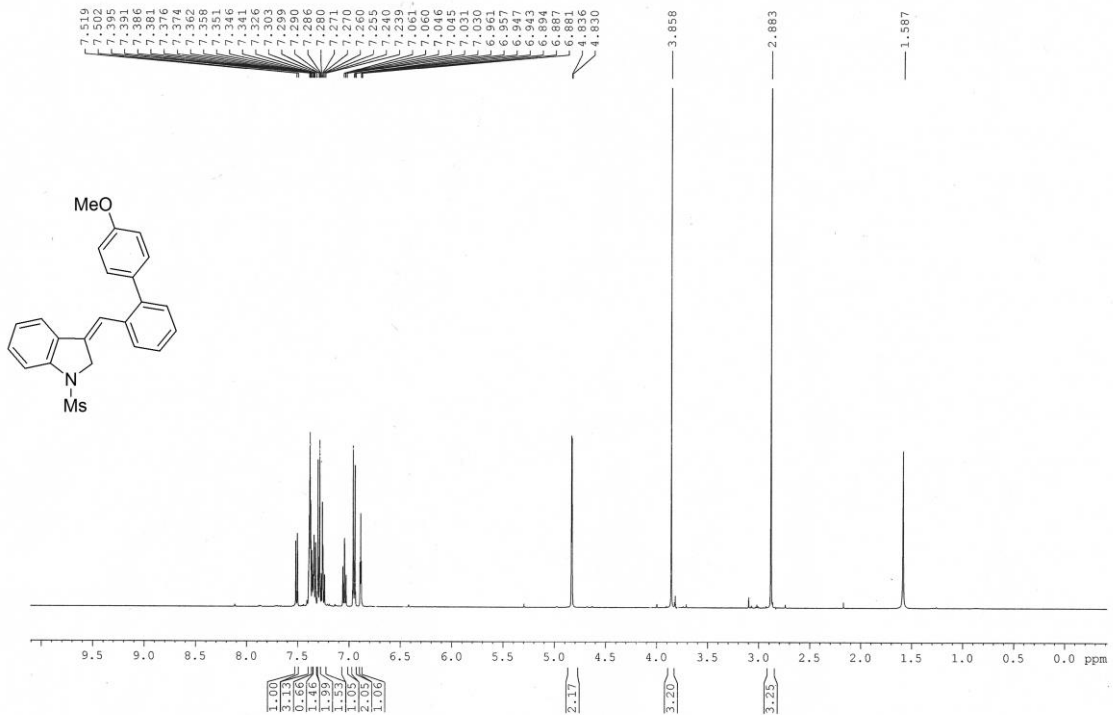



<sup>13</sup>CNMR of 2m, CDCl<sub>3</sub>, 125 MHz

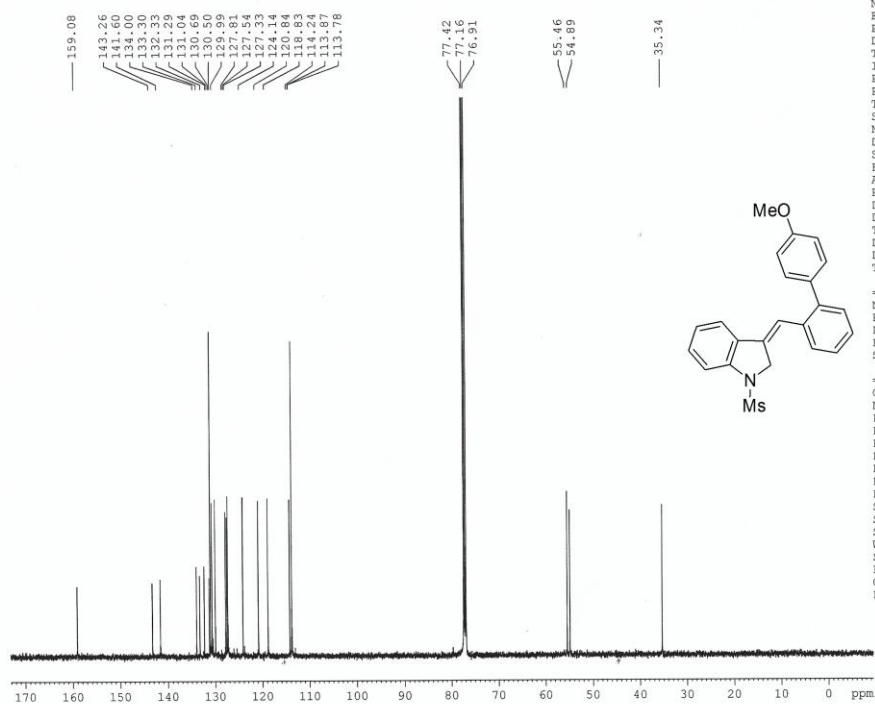

```

NAME      TG-AK-135R-13C
EXPNO    1
PROCNO   1
Date_    20190706
Time     19.28
INSTRUM  spect
PROBHD   5 mm SEI 1H/D-
PULPROG  zgpg30
TD       32768
SOLVENT  CDCl3
NS       4000
DS       2
SWH      29761.904 Hz
FIDRES   0.908261 Hz
AQ       0.5505524 sec
RG       32
DW       16.800 usec
DE       6.50 usec
TE       299.3 K
D1       2.00000000 sec
D11      0.03000000 sec
TD0      1

===== CHANNEL f1 =====
NUC1     13C
P1       15.00 usec
PL1      0.00 dB
PL1W     92.1862352 W
SF01     125.7955118 MHz

===== CHANNEL f2 =====
CPDPRG2  waltz16
NUC2     1H
PCPD2    80.00 usec
PL2      1.00 dB
PL12     21.86 dB
PL13     25.00 dB
PL2W     15.50318813 W
PL12W    0.12718062 W
PL13W    0.06171930 W
SF02     500.23200009 MHz
SI       32768
SF       125.7829180 MHz
WDW      EM
SSB      0
LB       1.00 Hz
GB       0
PC       1.40
    
```

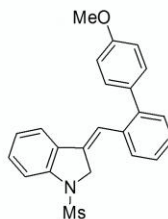

<sup>1</sup>H NMR of 2n, CDCl<sub>3</sub>, 500 MHz

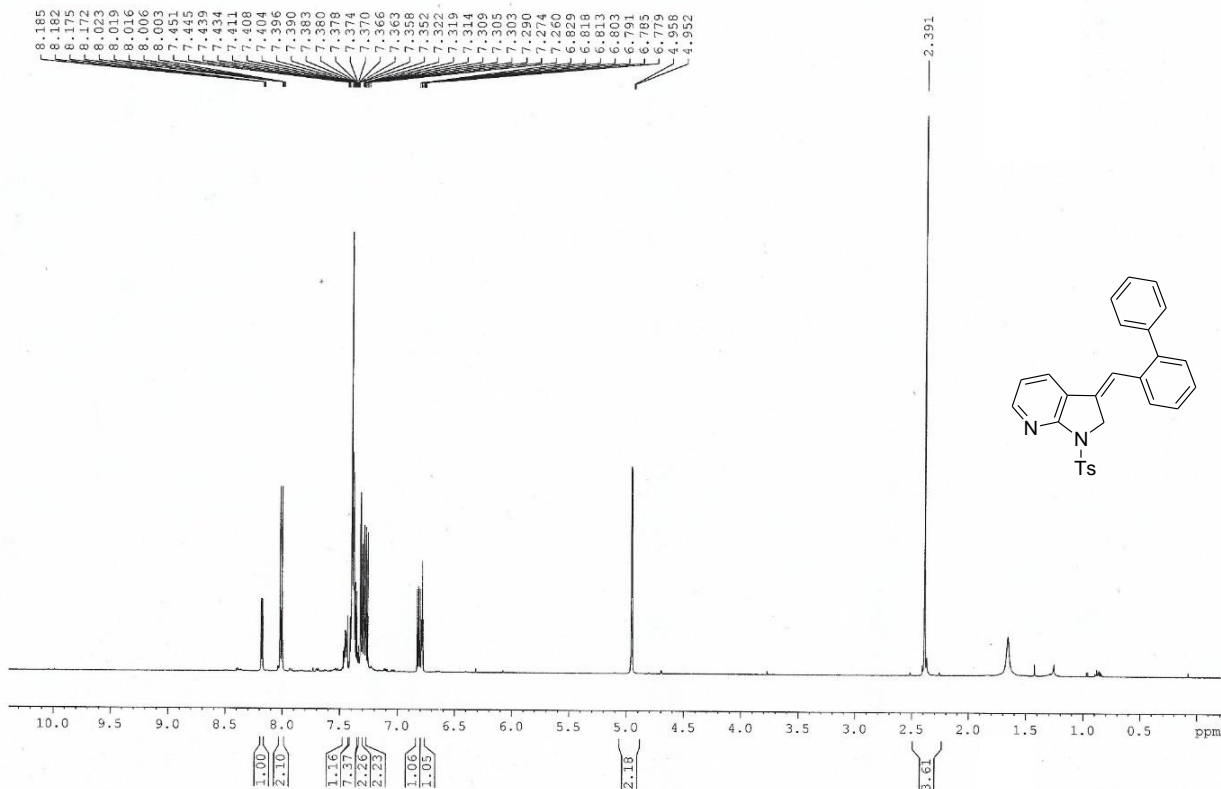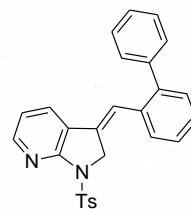

**<sup>13</sup>C NMR of 2n, CDCl<sub>3</sub>, 125 MHz**

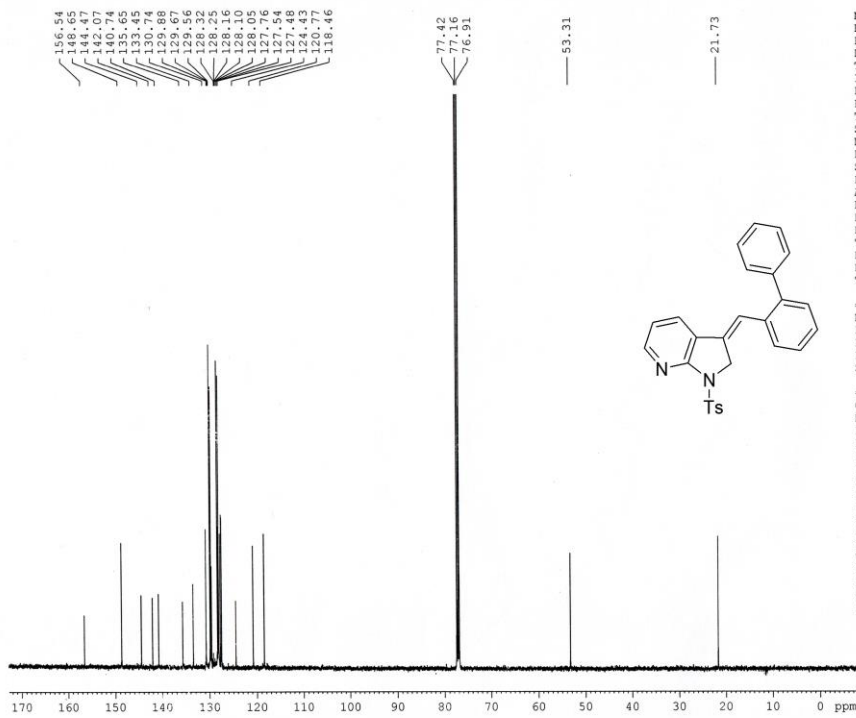

```

===== CHANNEL f1 =====
NUC1      13C
P1        15.00 usec
PL1       0.00 dB
PL1W      92.18623352 W
SF01      125.7955118 MHz

===== CHANNEL f2 =====
CPDPRG2   waltz16
NUC2      1H
PCPD2     80.00 usec
PL2       1.00 dB
PL12      21.86 dB
PL13      25.00 dB
PL2W      15.50318813 W
PL12W     0.12718062 W
PL13W     0.06171930 W
SF02      500.2320009 MHz
SI        32768
SF        125.7829193 MHz
NMQ       EM
SSB       0
LB        1.00 Hz
GB        0
PC        1.40
    
```

**<sup>1</sup>H NMR of 2o, CDCl<sub>3</sub>, 400 MHz**

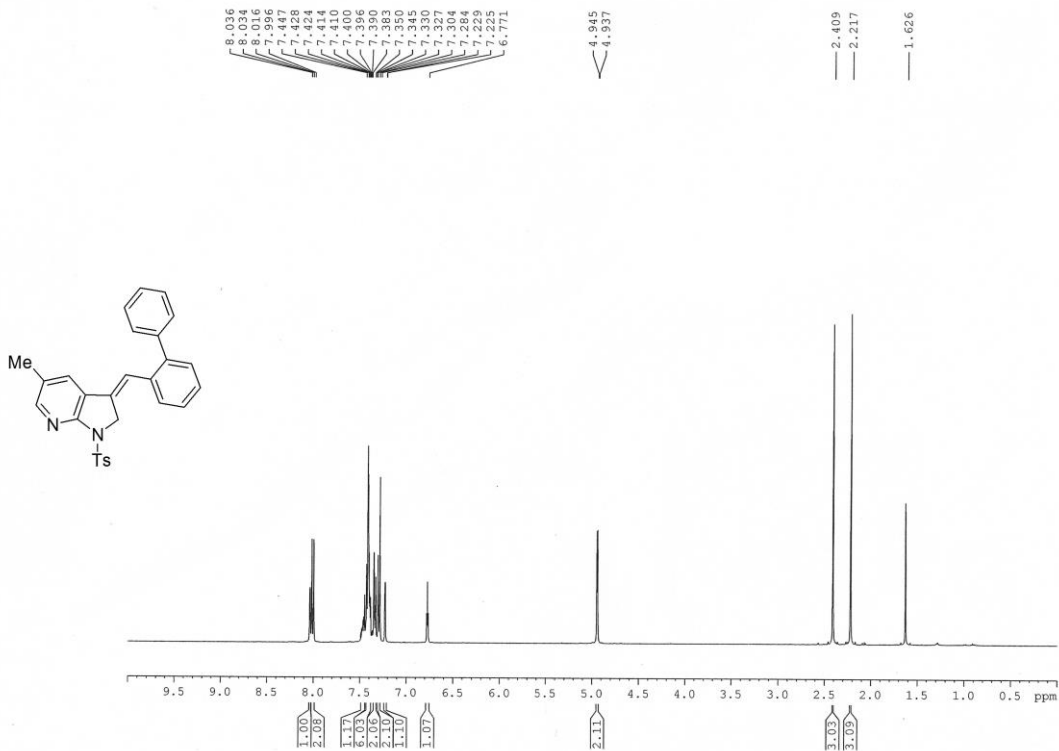

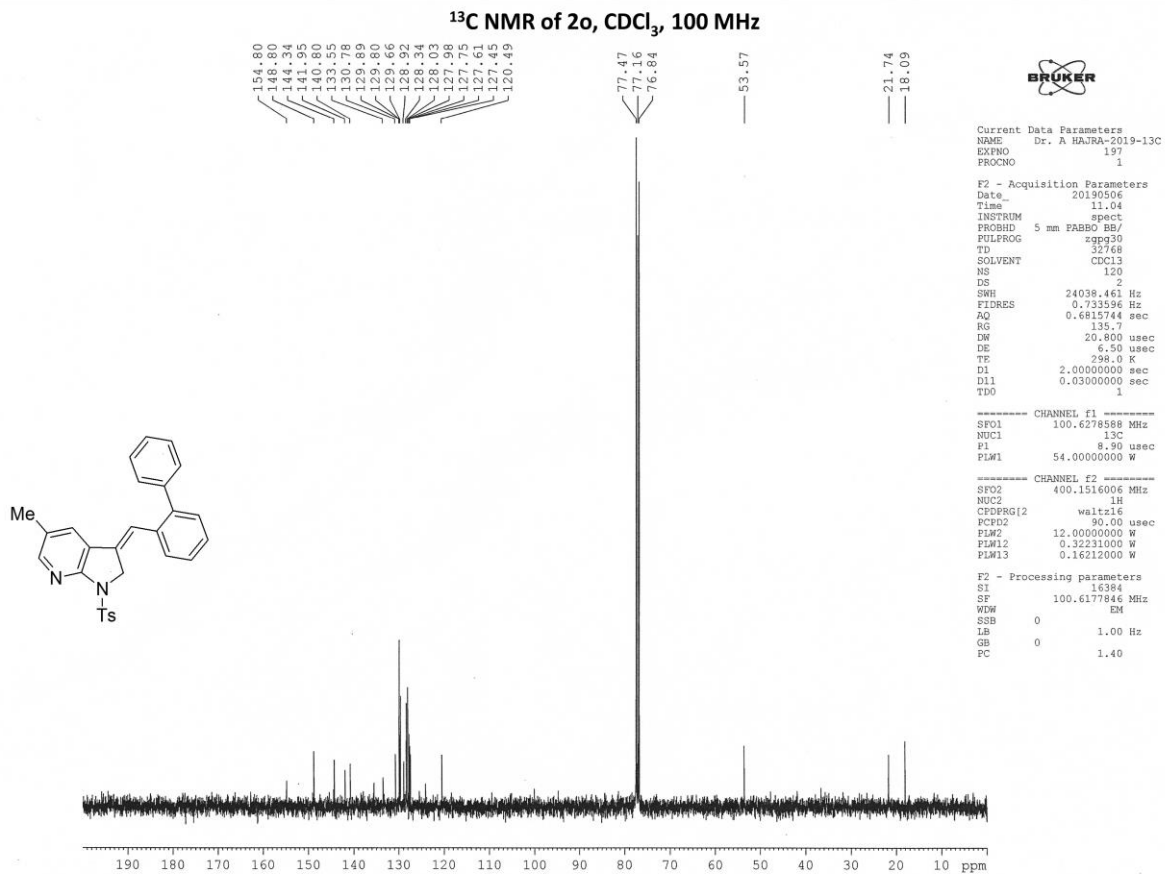

**<sup>1</sup>H NMR of 3a, CDCl<sub>3</sub>, 300 MHz**

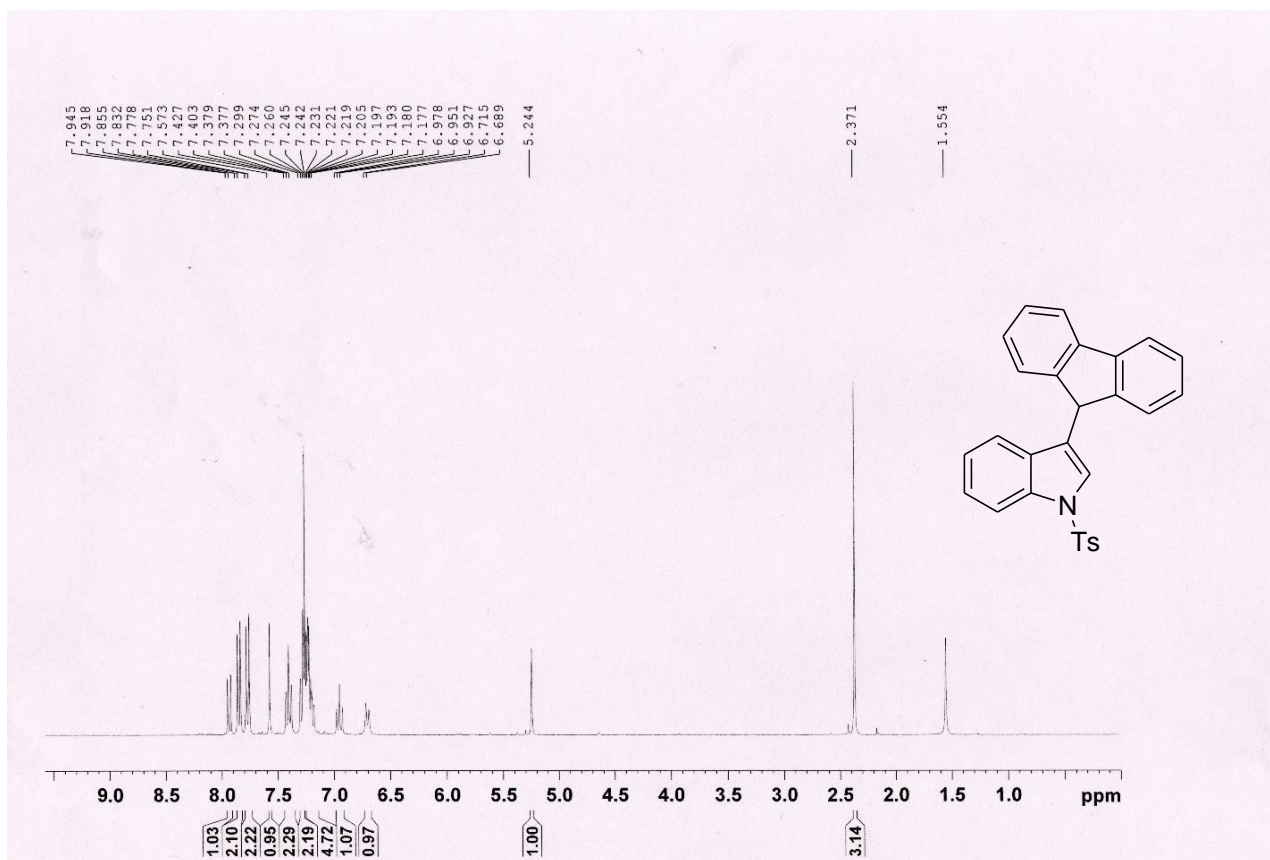

<sup>13</sup>C NMR of 3a, CDCl<sub>3</sub>, 75 MHz

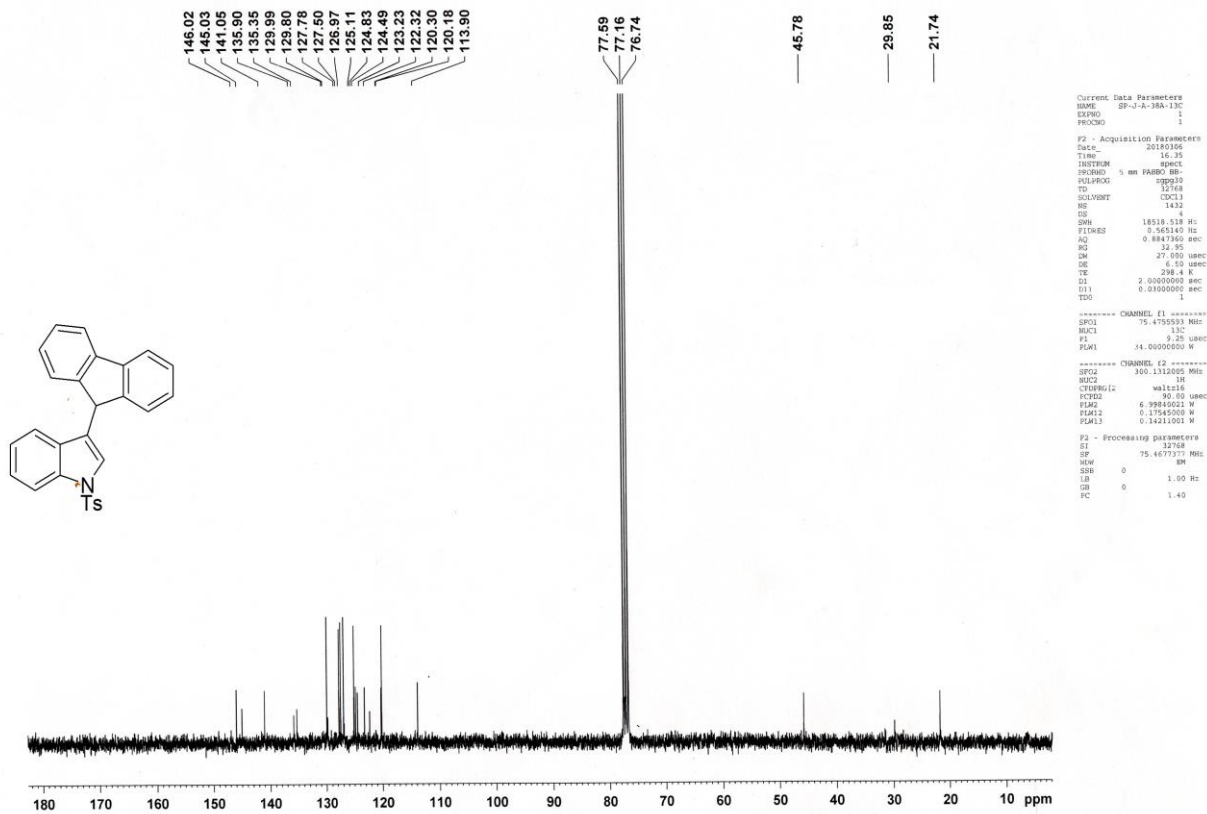

<sup>1</sup>H NMR of 3b, CDCl<sub>3</sub>, 300 MHz

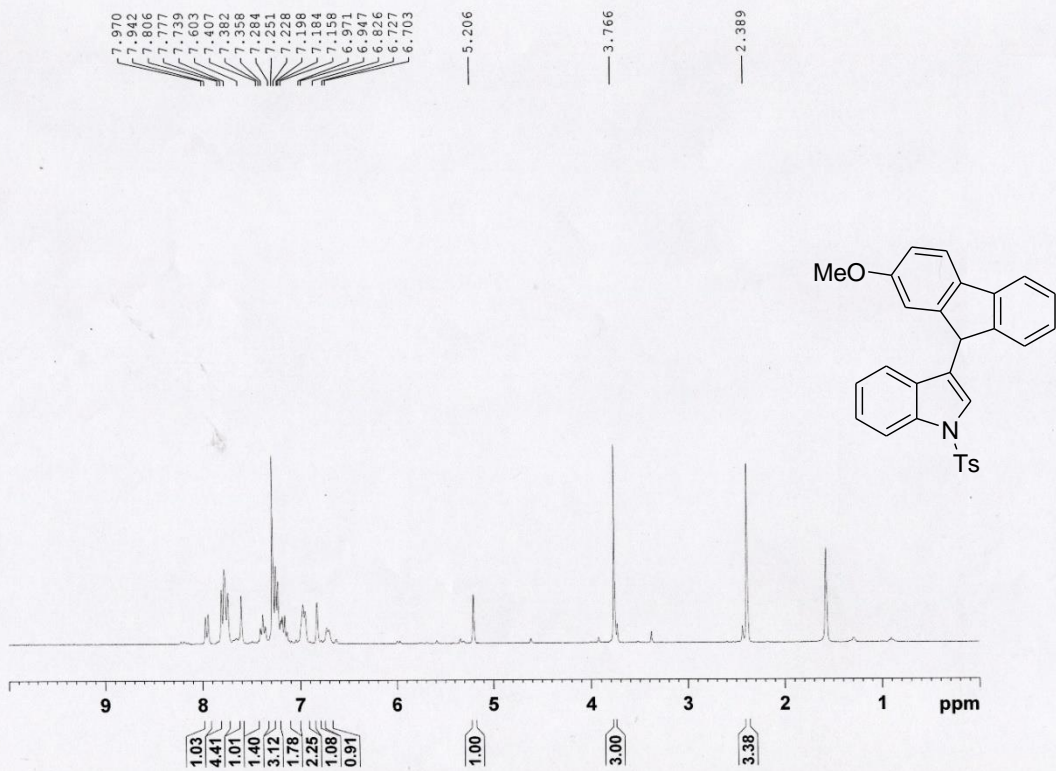

<sup>13</sup>C NMR of 3b, CDCl<sub>3</sub>, 75 MHz

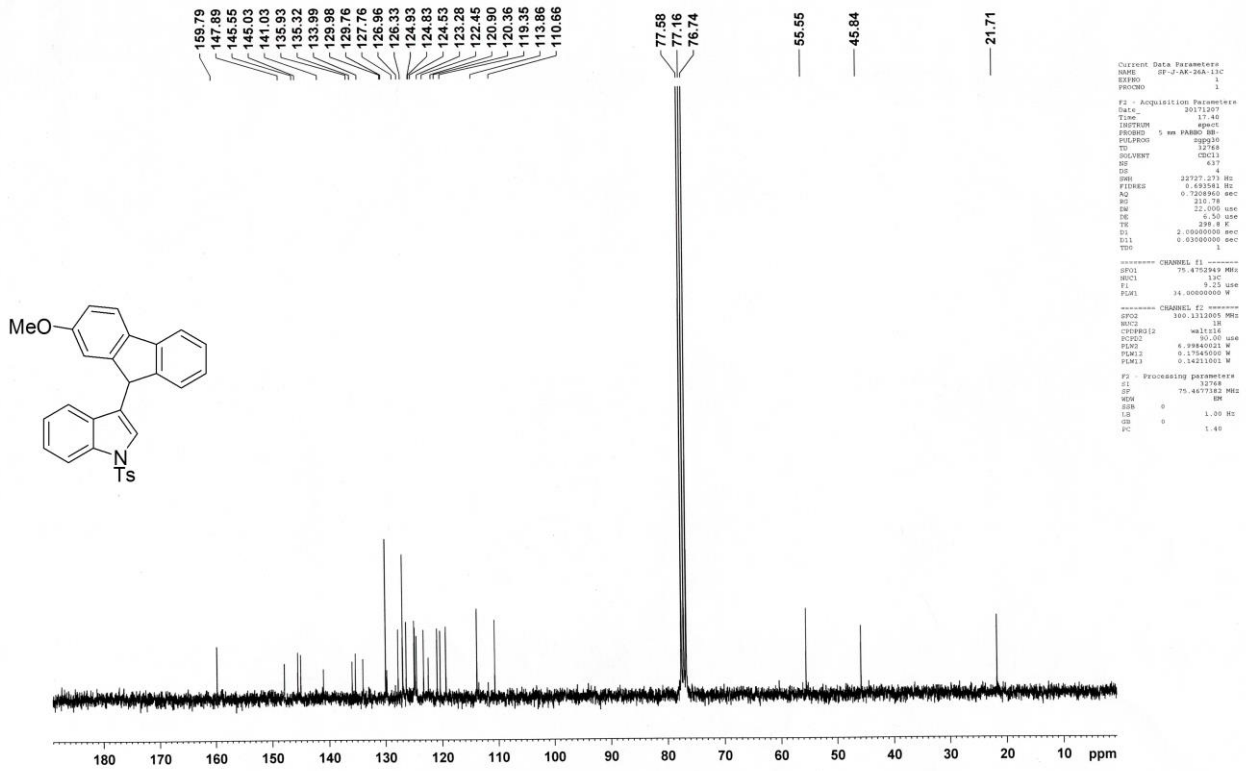

<sup>1</sup>H NMR of 3c, CDCl<sub>3</sub>, 400 MHz

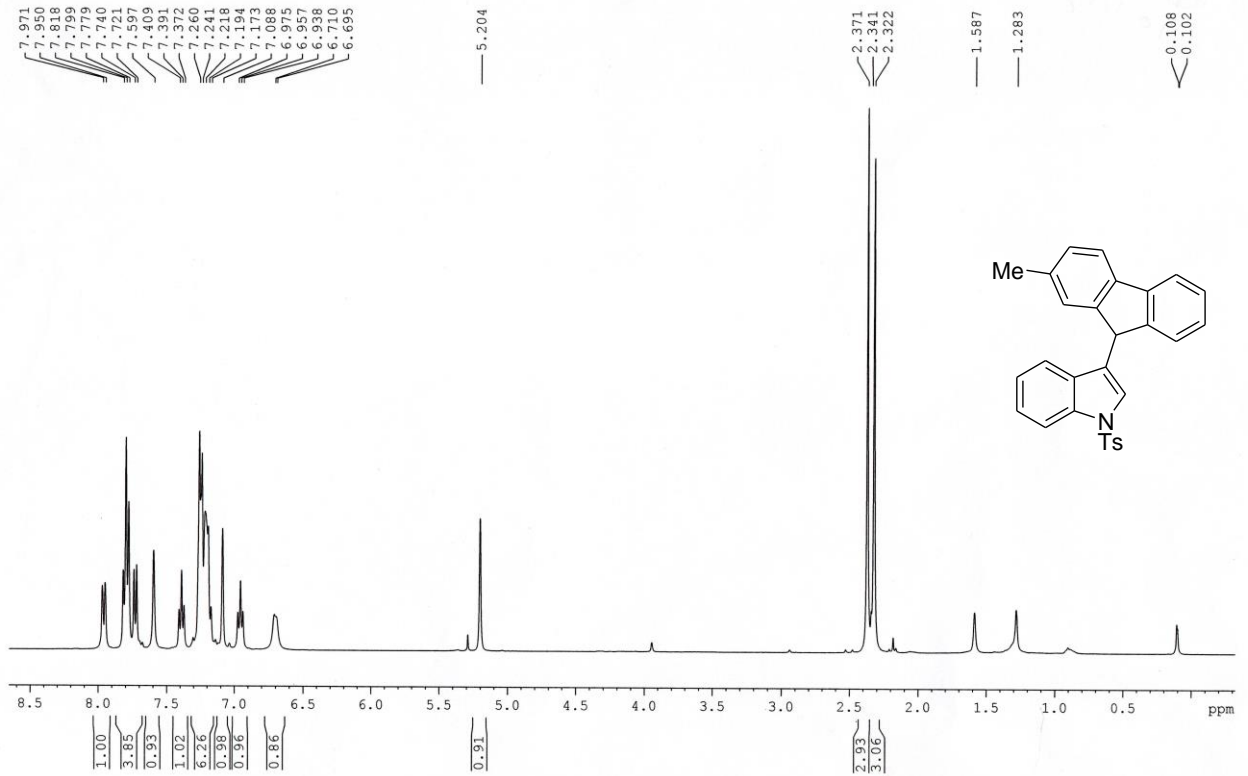



### <sup>13</sup>C NMR of 3c, CDCl<sub>3</sub>, 100 MHz

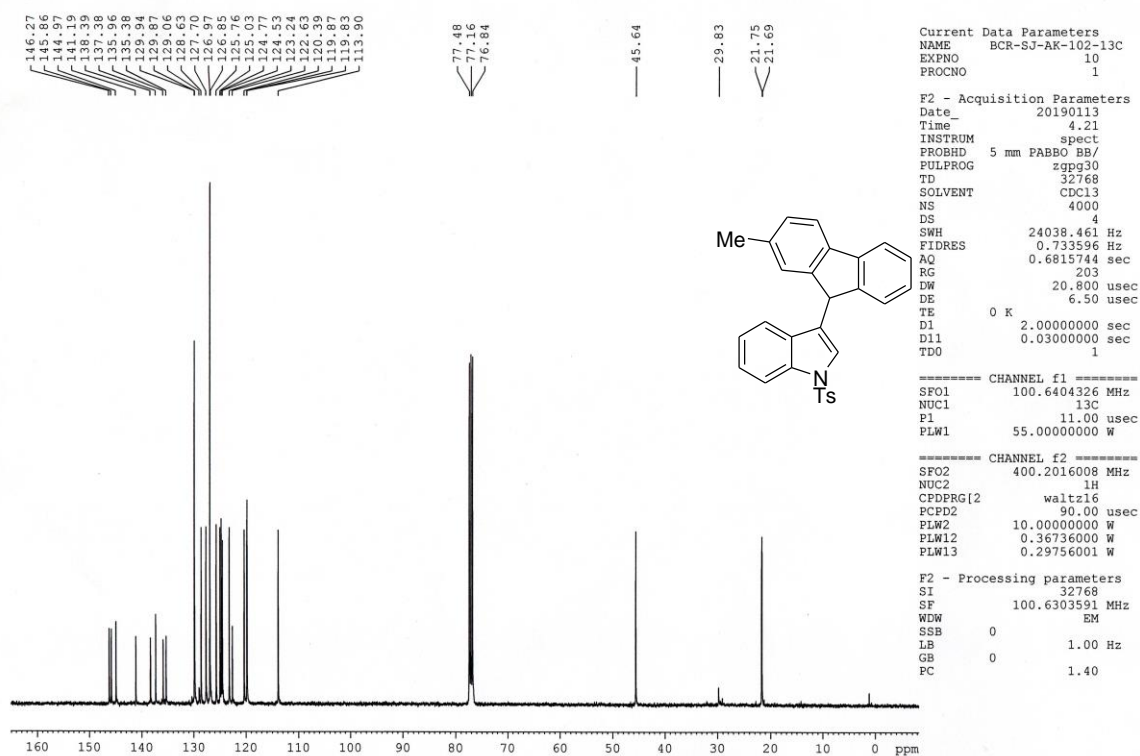

### <sup>1</sup>H NMR of 3d, CDCl<sub>3</sub>, 400 MHz

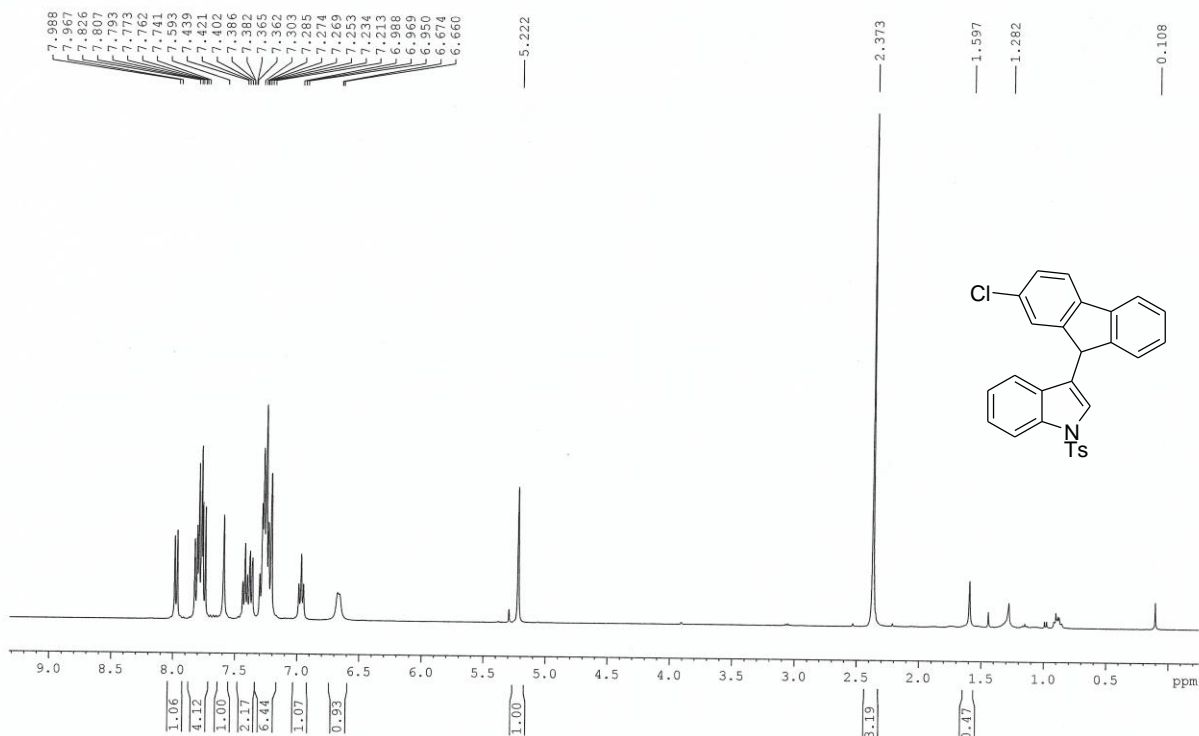

### <sup>13</sup>C NMR of 3d, CDCl<sub>3</sub>, 100 MHz

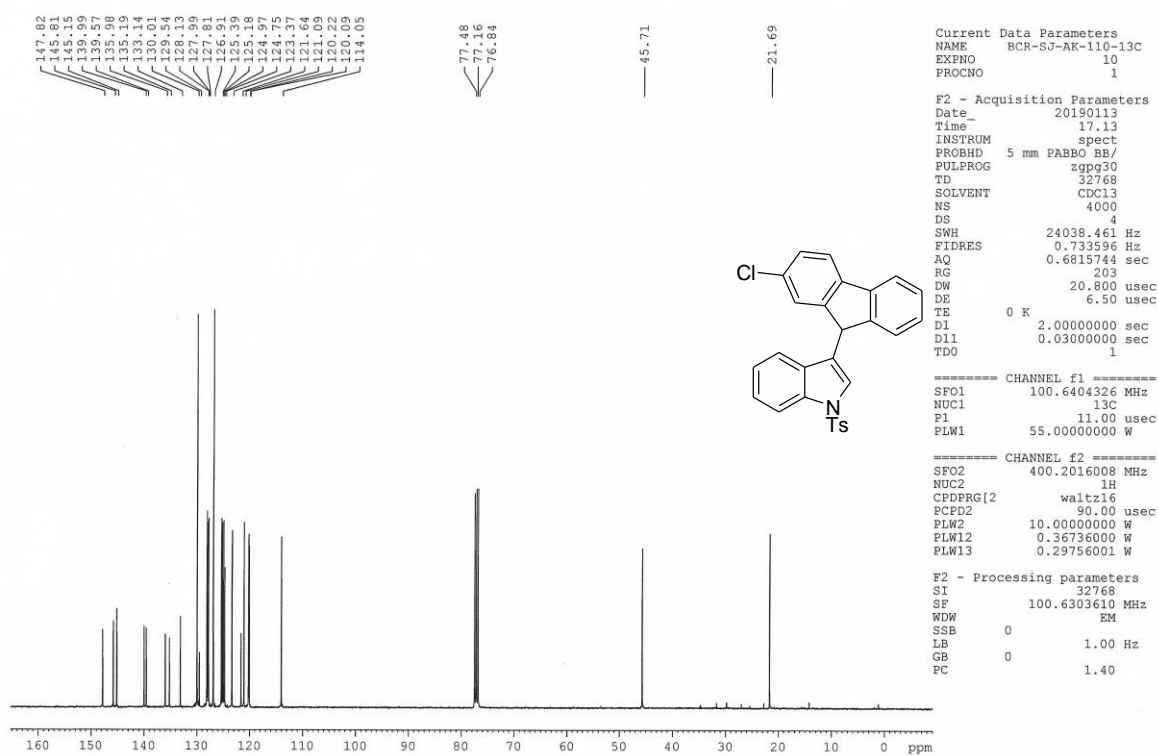

### <sup>13</sup>C NMR expansion of 3d, CDCl<sub>3</sub>, 100 MHz

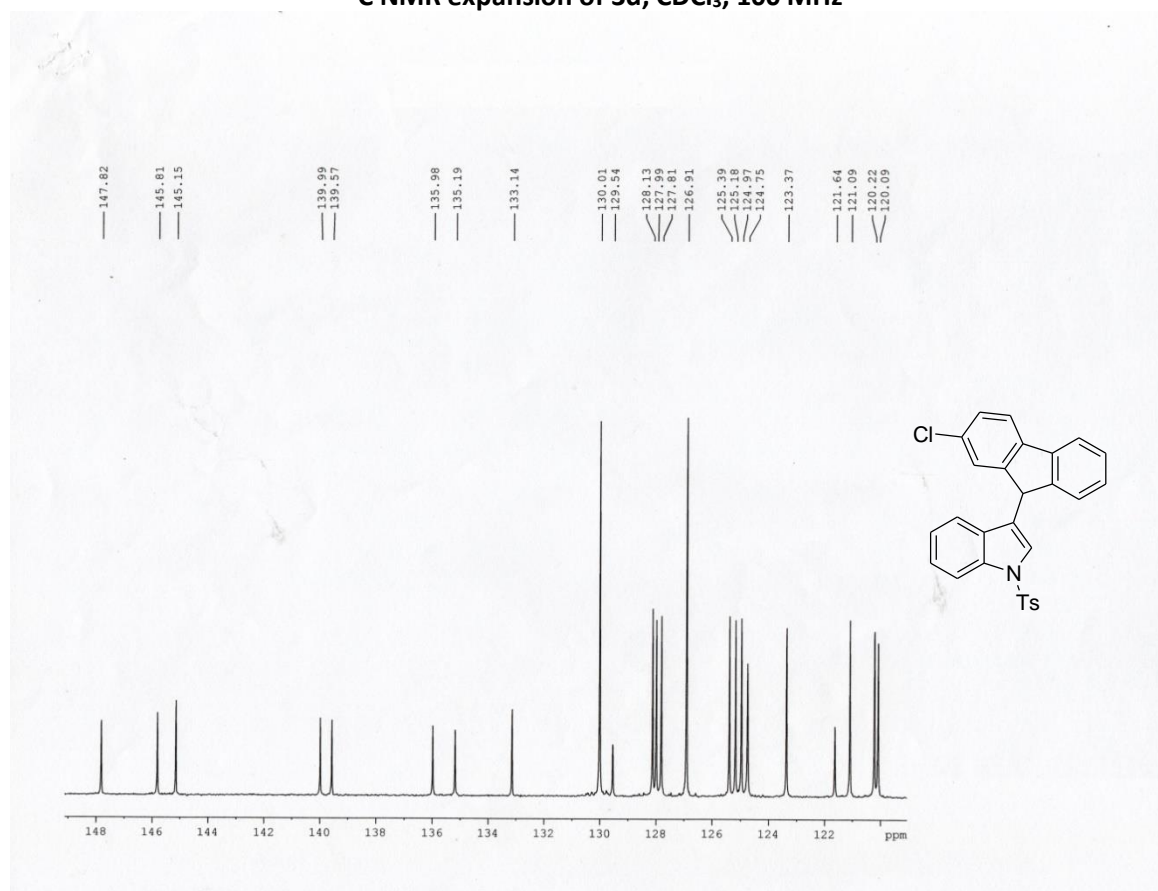

**<sup>1</sup>H NMR of 3e, CDCl<sub>3</sub>, 300 MHz**

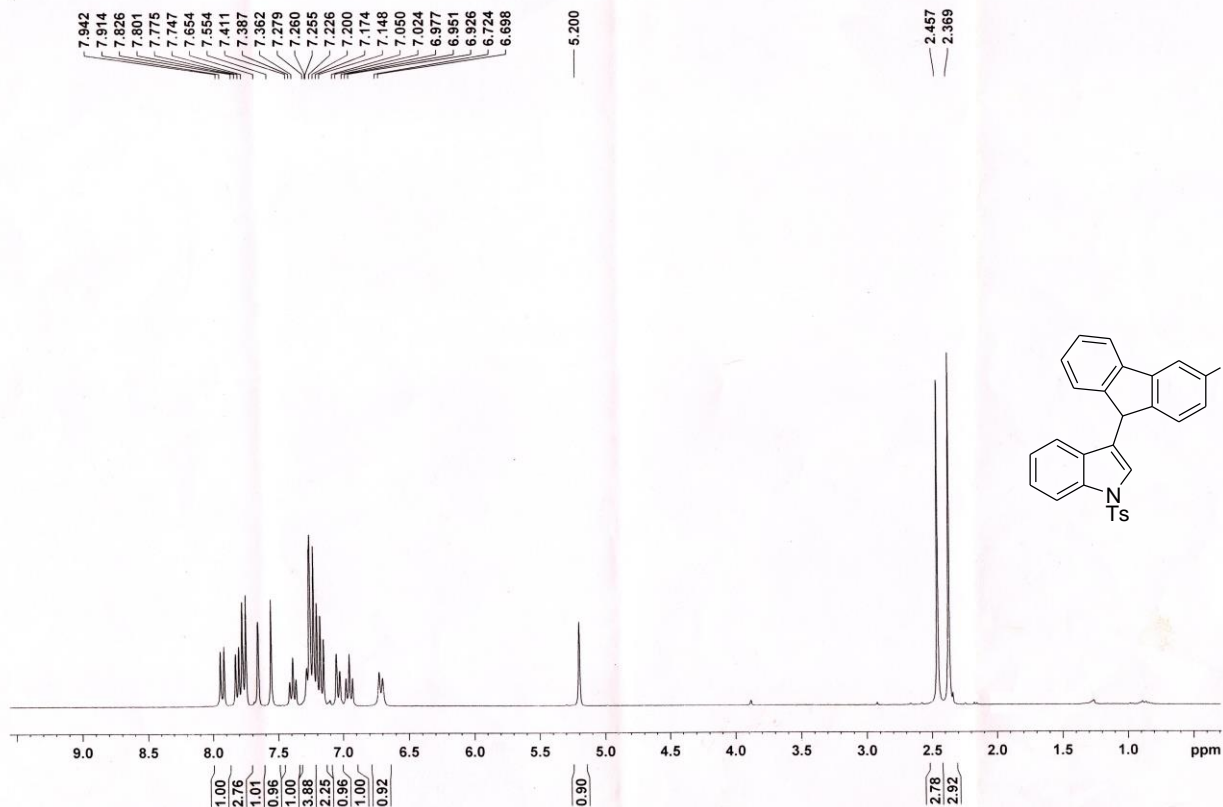

**<sup>13</sup>C NMR of 3e, CDCl<sub>3</sub>, 125 MHz**

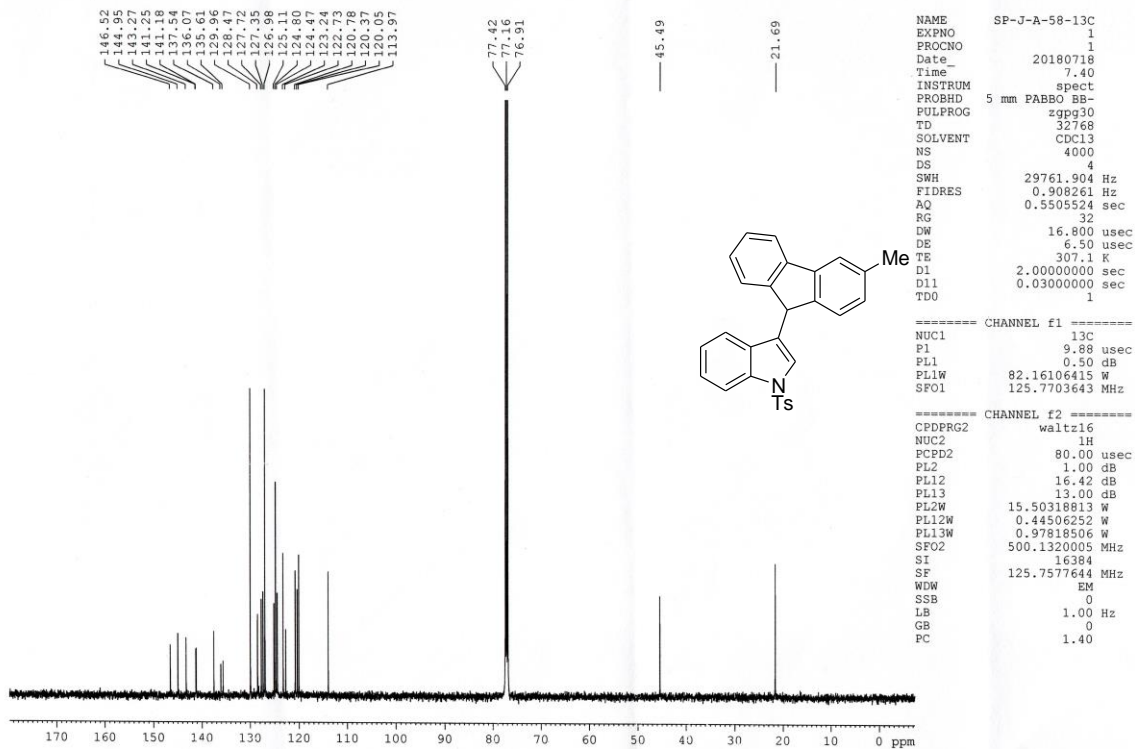



### <sup>1</sup>H NMR of 3f, CDCl<sub>3</sub>, 400 MHz

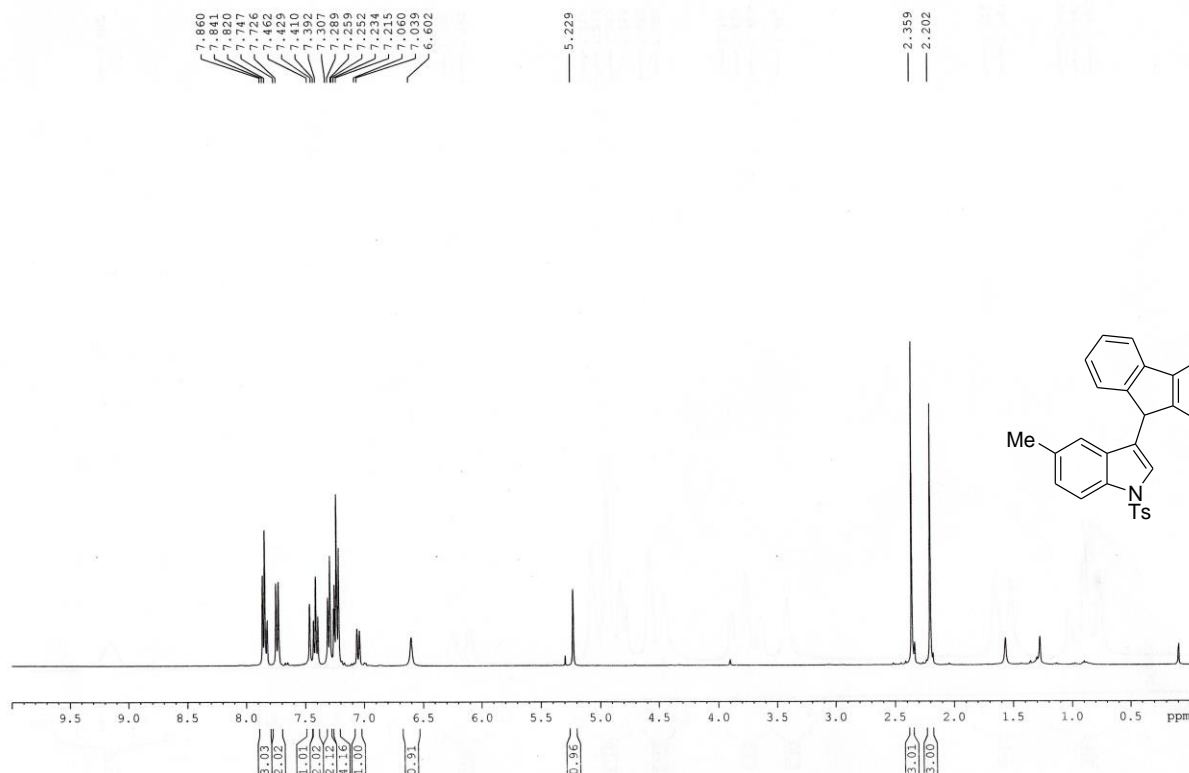

### <sup>13</sup>C NMR of 3f, CDCl<sub>3</sub>, 100 MHz

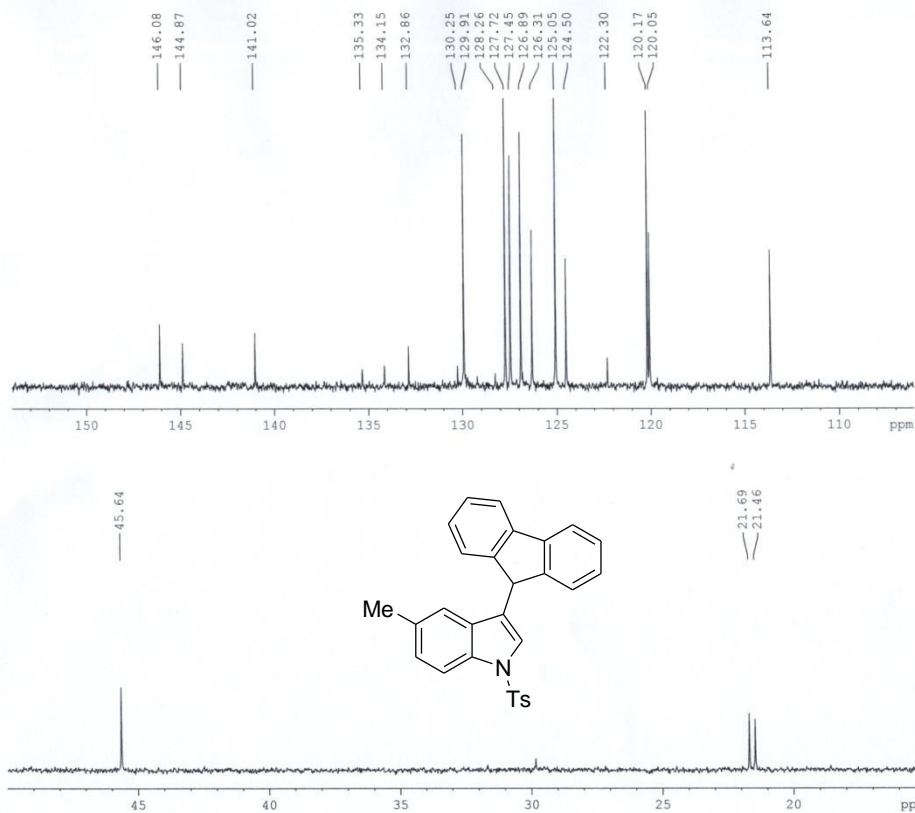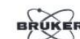

Current Data Parameters  
NAME Dr. A HAJRA 2018-2nd  
EXFO 1332  
PROCNO 1

F2 - Acquisition Parameters  
Date 20181001  
Time 0.27  
INSTRUM spect  
PROBHD 5 mm PABBO BB/  
PULPROG zgpg  
TD 32768  
SOLVENT CDCl3  
NS 150  
DS 2  
SWH 24038.461 Hz  
FIDRES 0.733596 Hz  
AQ 0.6813744 sec  
RG 87.66  
DW 20.800 usec  
DE 6.50 usec  
TE 300.0 K  
D1 2.00000000 sec  
D11 0.03000000 sec  
TDO 1

----- CHANNEL f1 -----  
SFO1 100.6278588 MHz  
NUC1 13C  
P1 8.90 usec  
PLM1 54.00000000 W

----- CHANNEL f2 -----  
SFO2 400.1516006 MHz  
NUC2 1H  
CPDPRG2 waltz16  
PCPD2 90.00 usec  
PLM2 12.00000000 W  
PLM12 0.32231000 W

F2 - Processing parameters  
SI 16384  
SF 100.6177857 MHz  
WVW EM  
SSB 0  
LB 1.00 Hz  
GB 0  
FC 1.40

<sup>1</sup>H NMR of 3g, CDCl<sub>3</sub>, 300 MHz

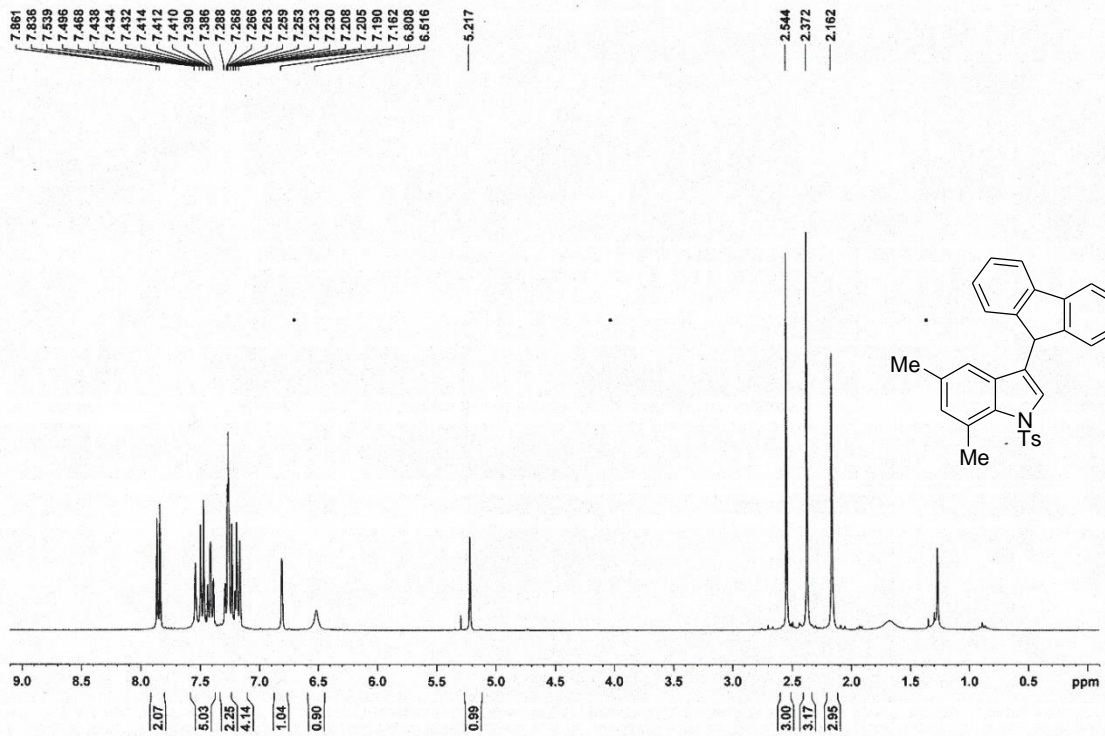

<sup>13</sup>C NMR of 3g, CDCl<sub>3</sub>, 75 MHz

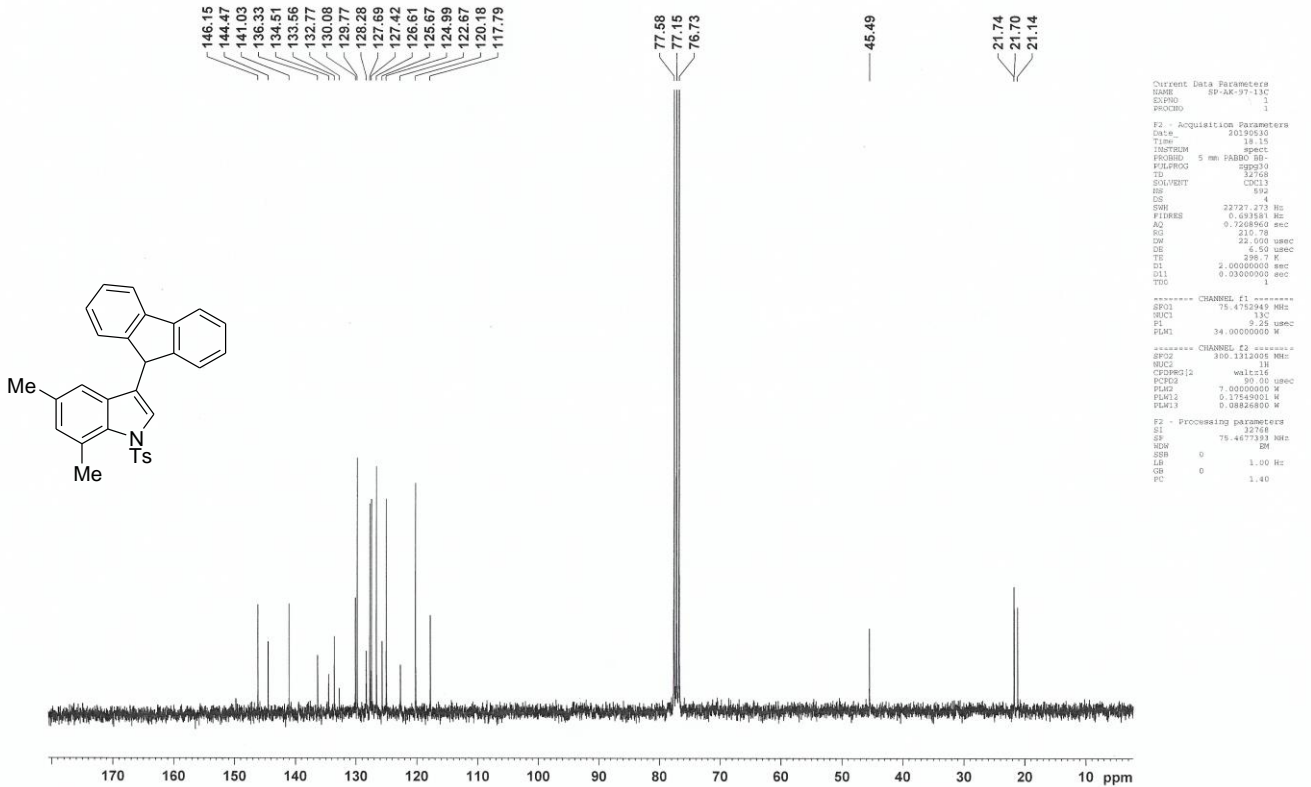

<sup>1</sup>H NMR of 3h, CDCl<sub>3</sub>, 400 MHz

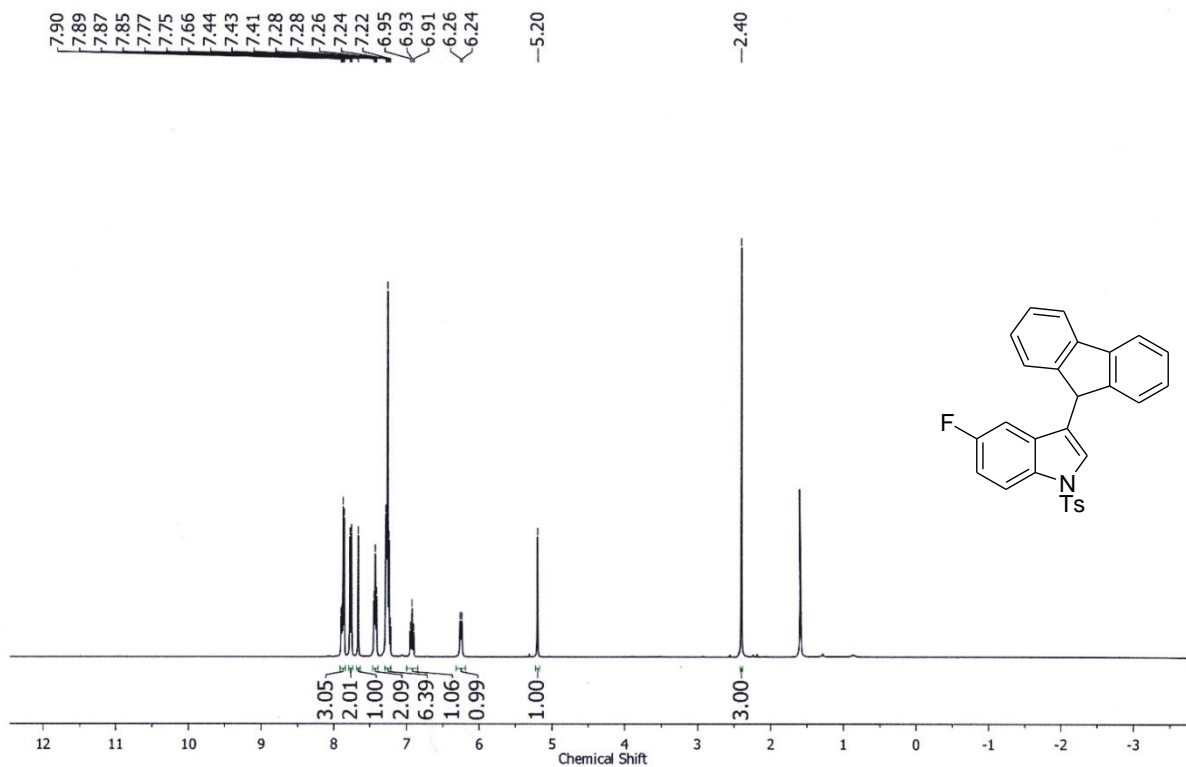

<sup>13</sup>C NMR of 3h, CDCl<sub>3</sub>, 100 MHz

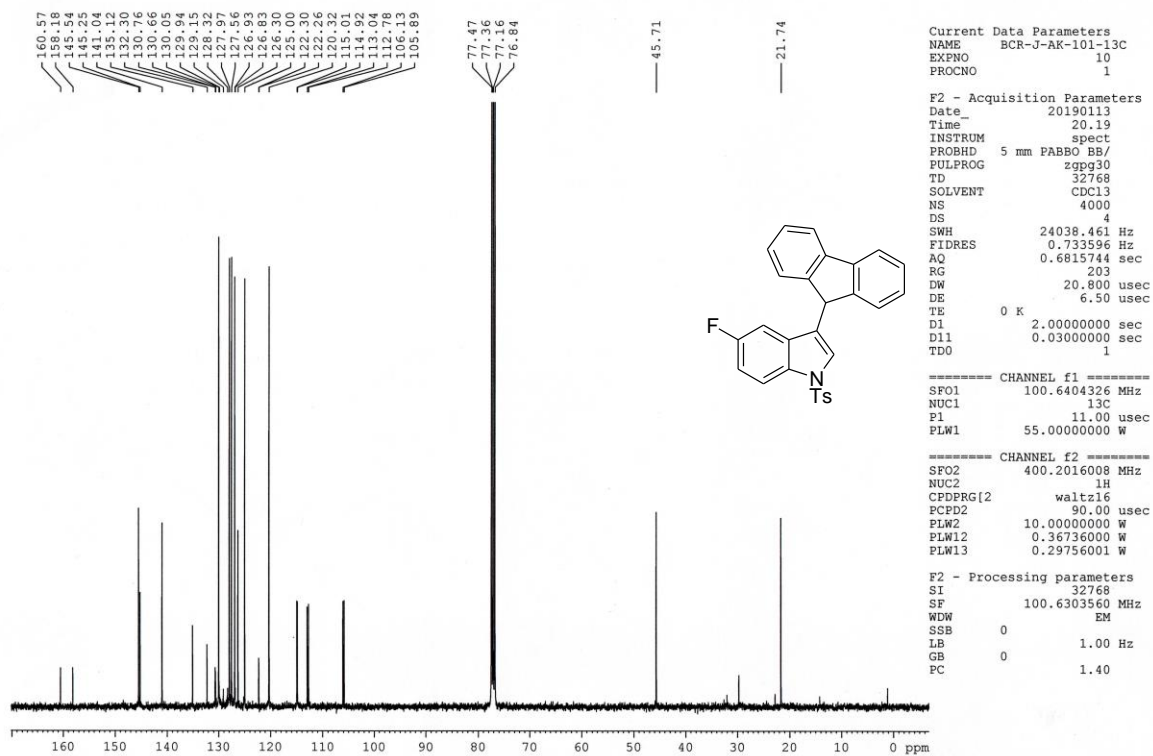

<sup>13</sup>C NMR expansion of 3h, CDCl<sub>3</sub>, 100 MHz

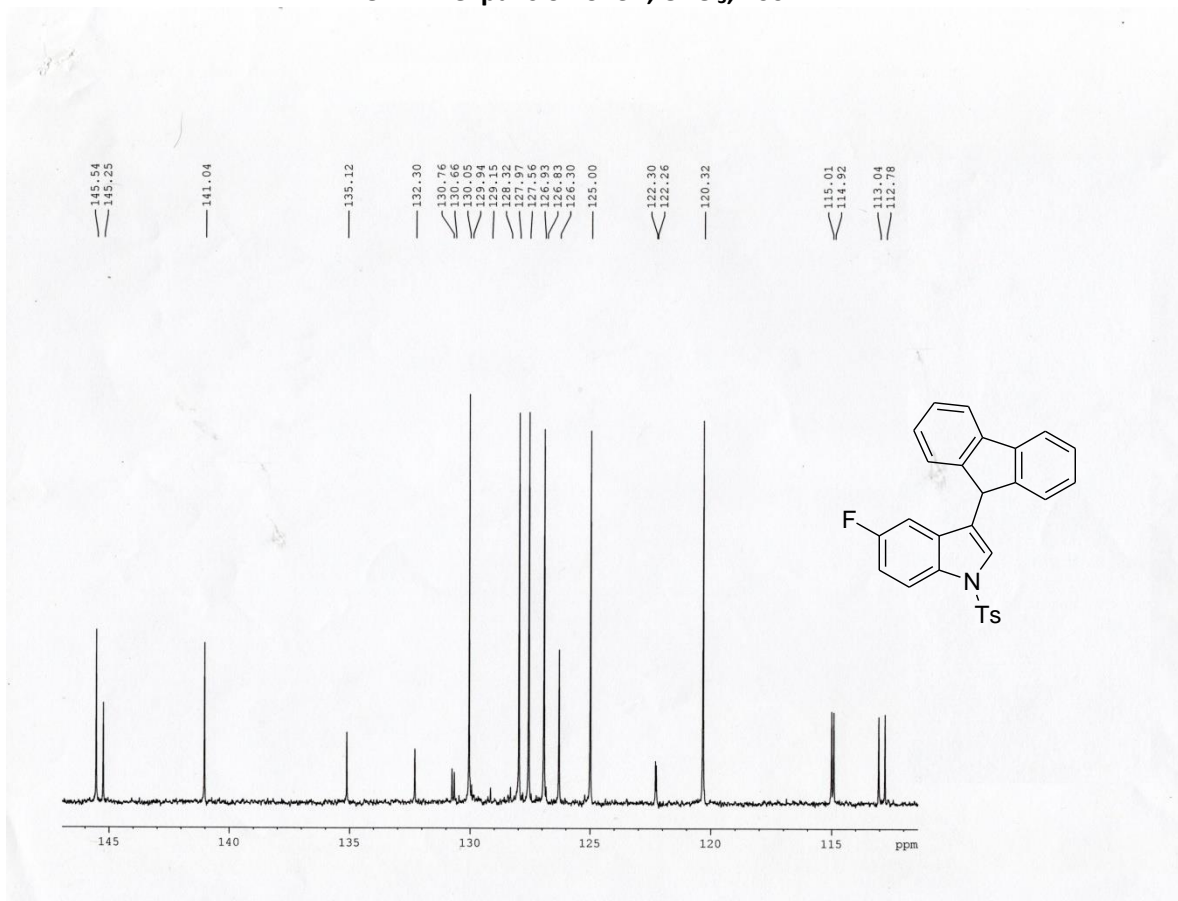

<sup>1</sup>H NMR of 3i, CDCl<sub>3</sub>, 400 MHz

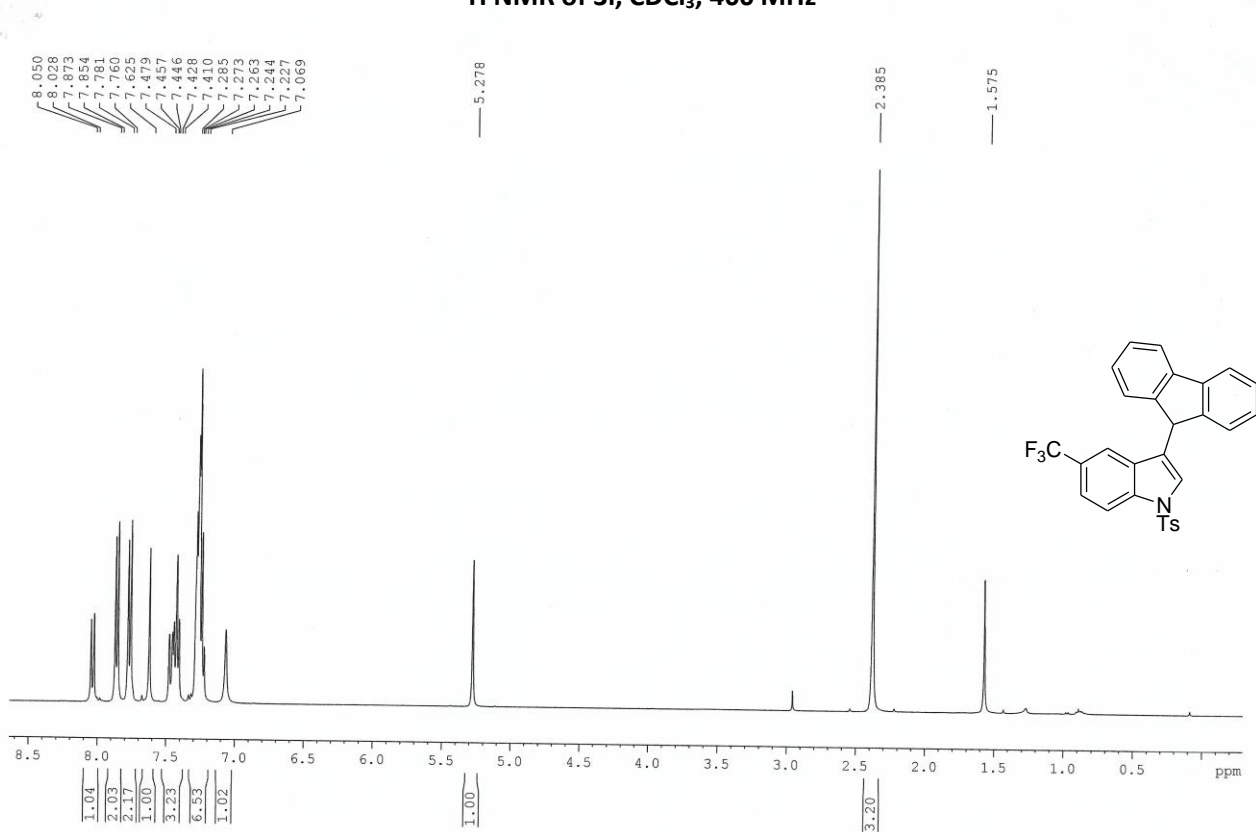

### <sup>13</sup>C NMR of 3i, CDCl<sub>3</sub>, 100 MHz

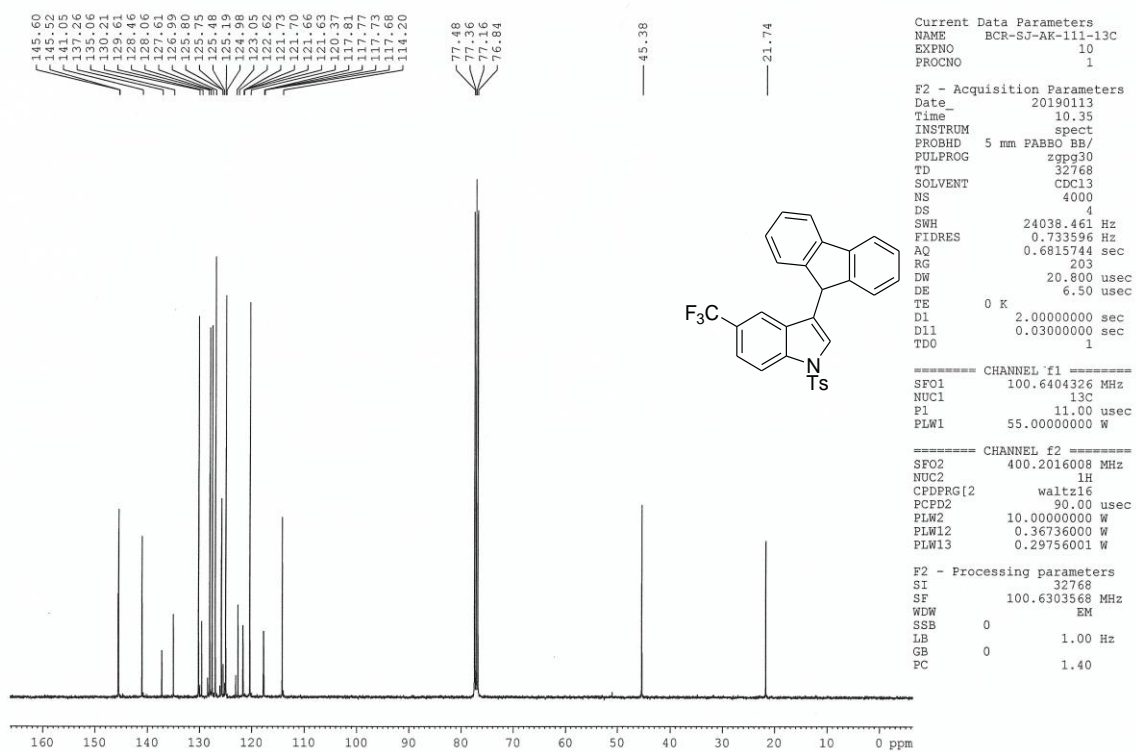

### <sup>13</sup>C NMR expansion of 3i, CDCl<sub>3</sub>, 100 MHz

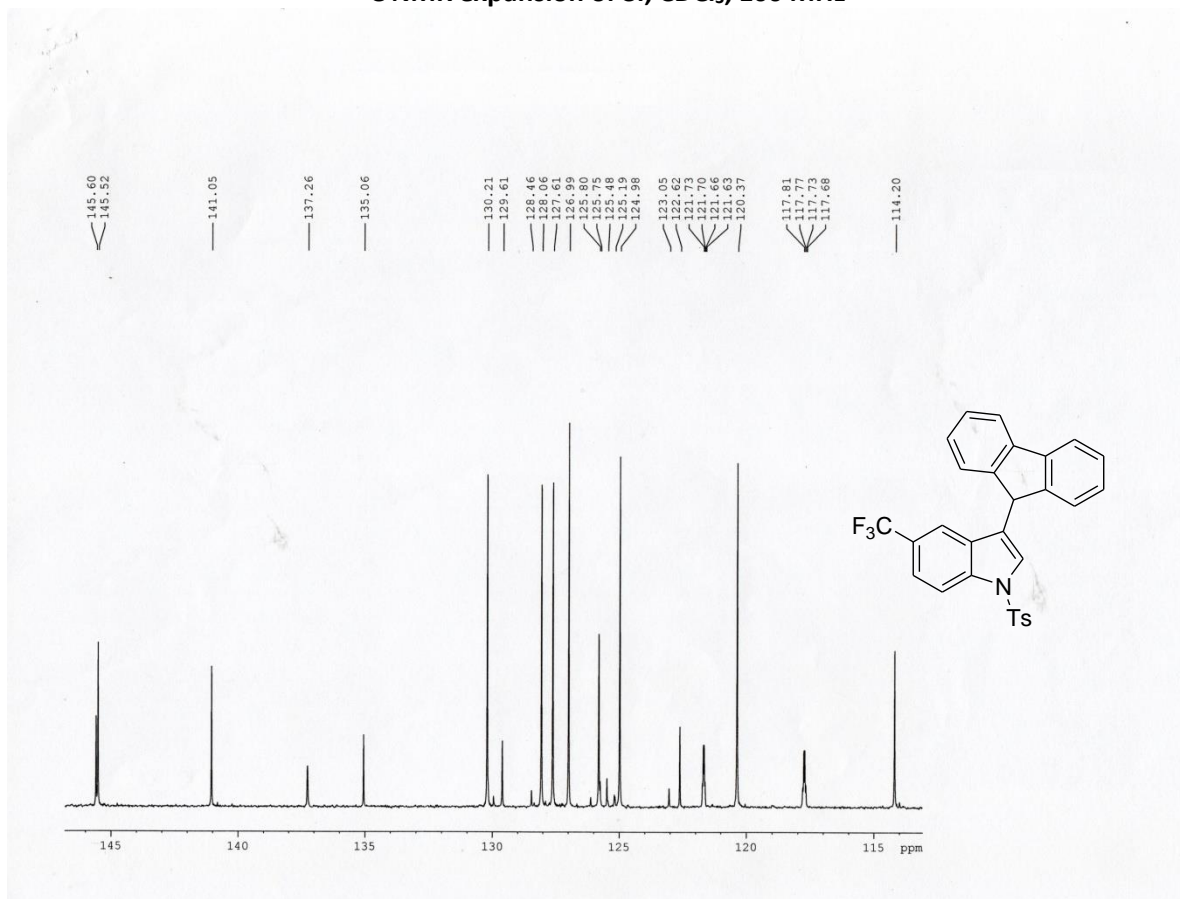



<sup>1</sup>H NMR of 3j, CDCl<sub>3</sub>, 300 MHz

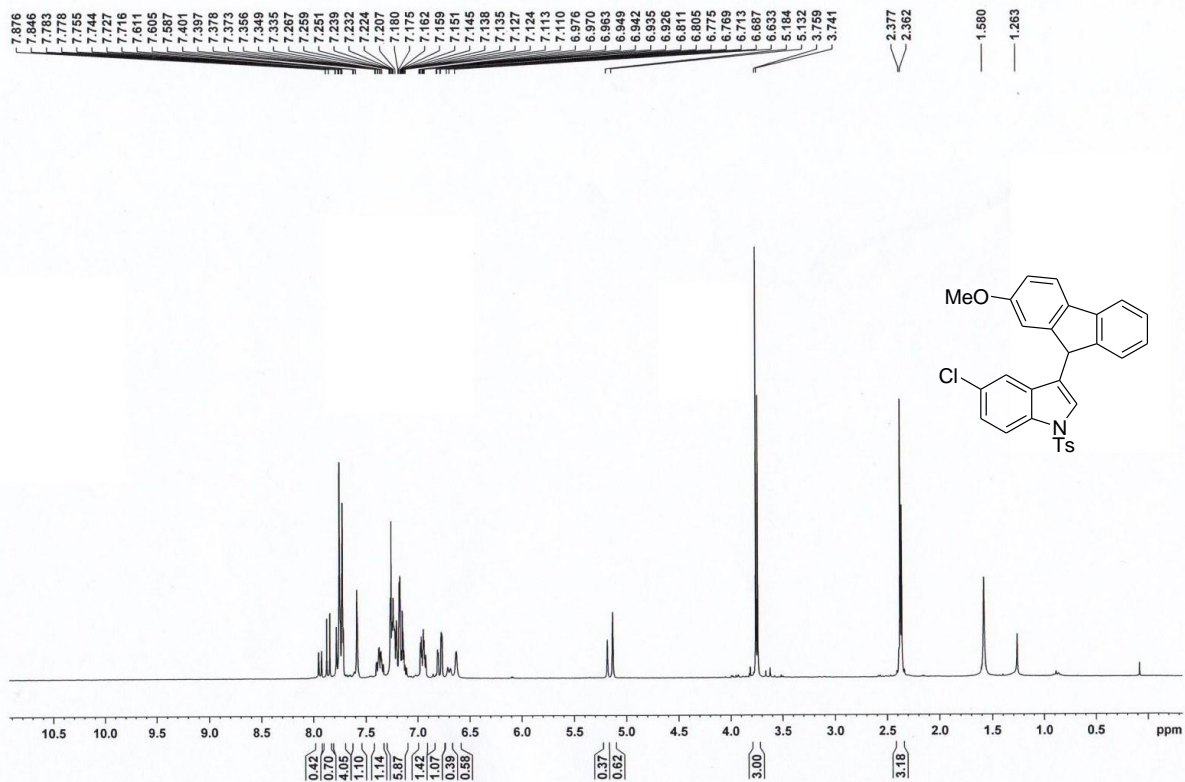

<sup>13</sup>C NMR of 3j, CDCl<sub>3</sub>, 100 MHz

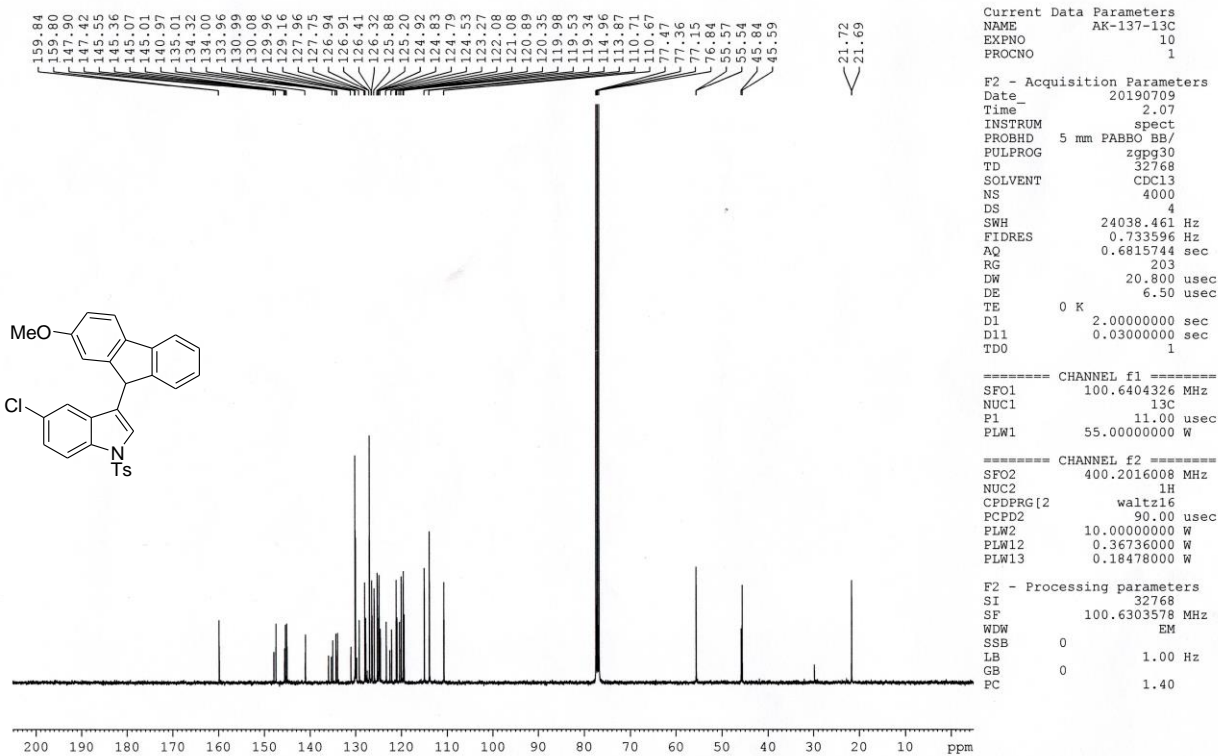

<sup>1</sup>H NMR of 3k, CDCl<sub>3</sub>, 400 MHz

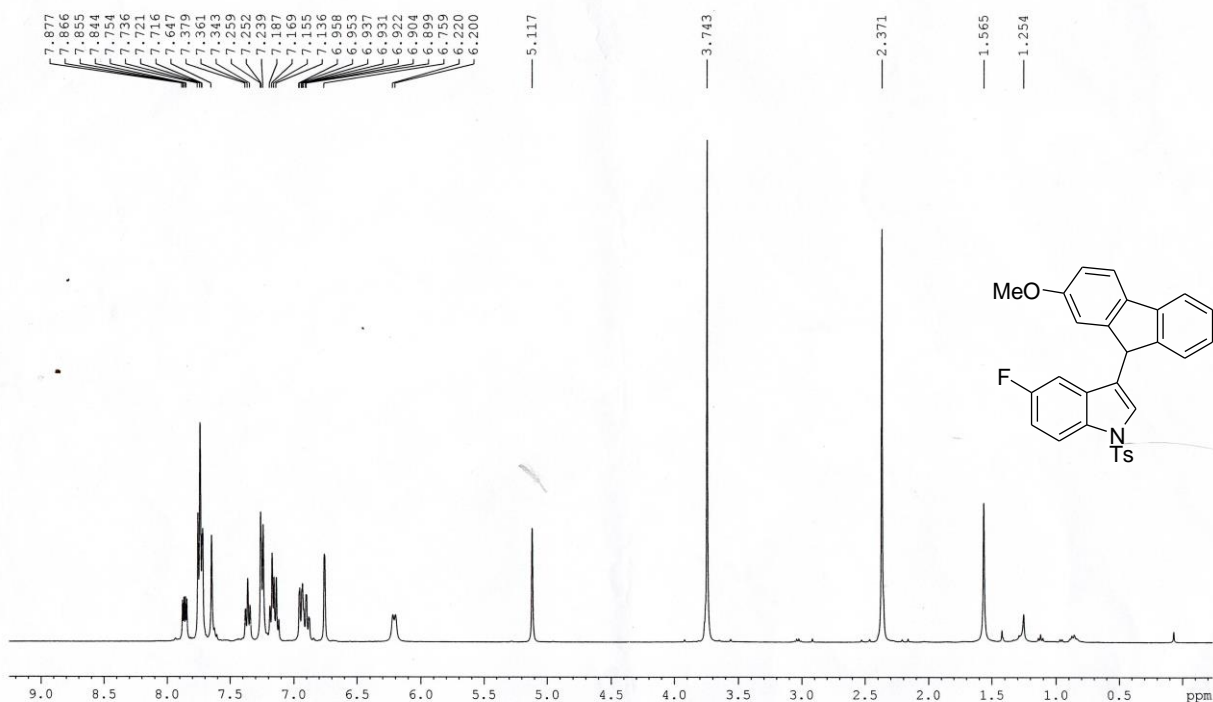

<sup>13</sup>C NMR of 3k, CDCl<sub>3</sub>, 125 MHz

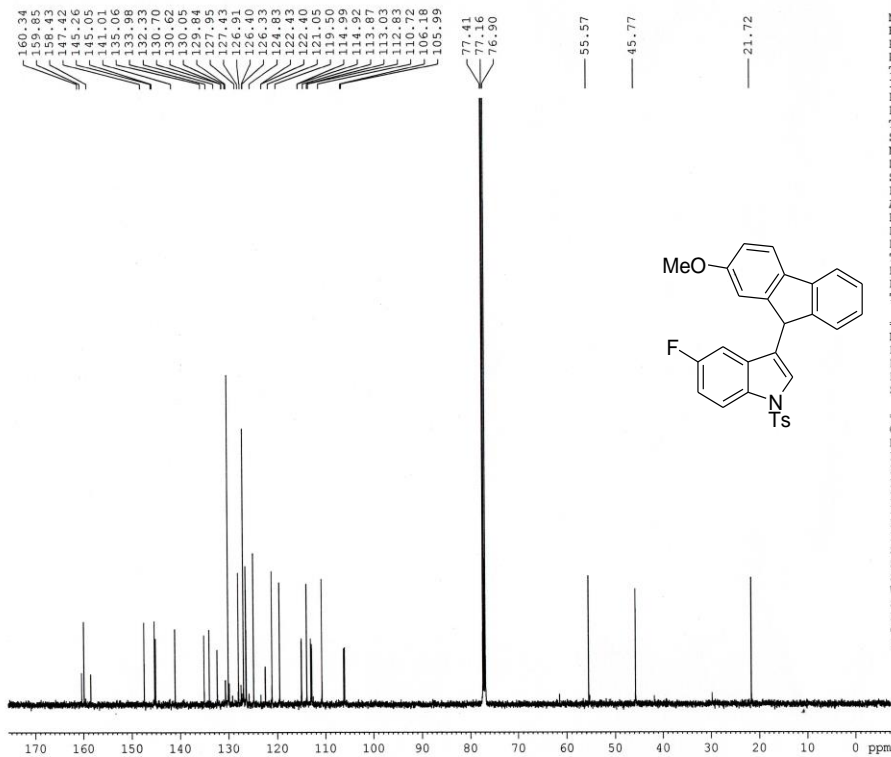





**<sup>1</sup>H NMR of 3m, CDCl<sub>3</sub>, 400 MHz**

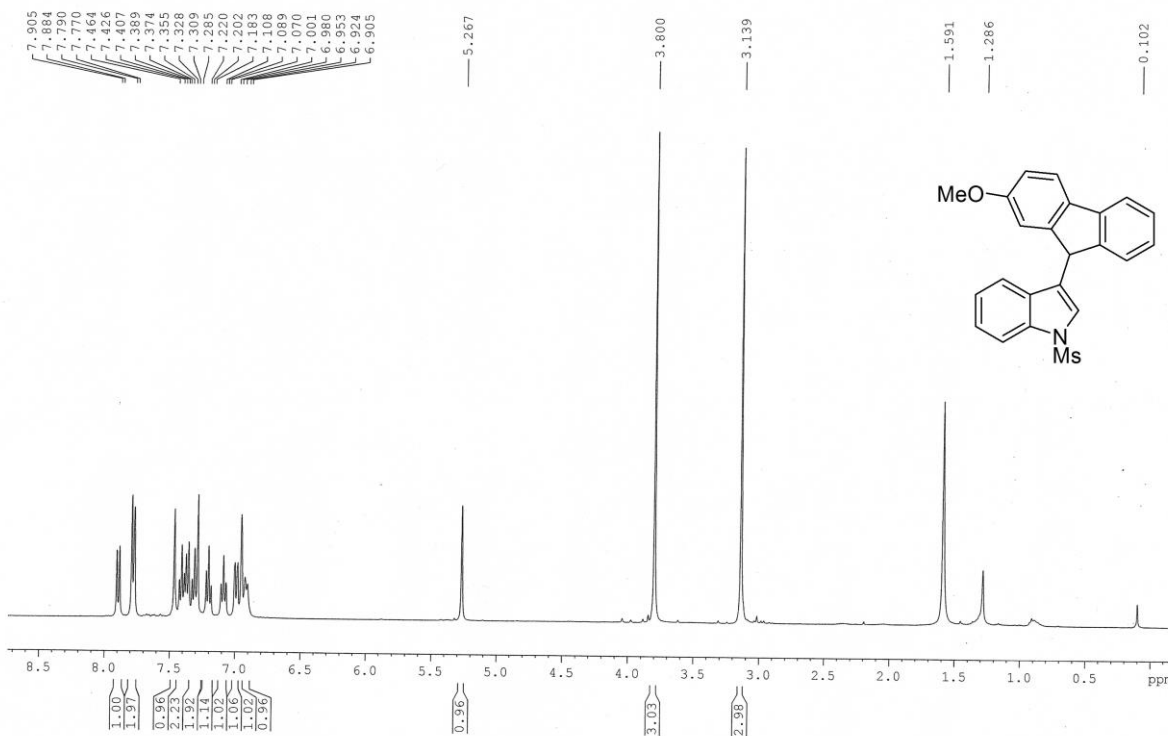

**<sup>13</sup>C NMR of 3m, CDCl<sub>3</sub>, 75 MHz**

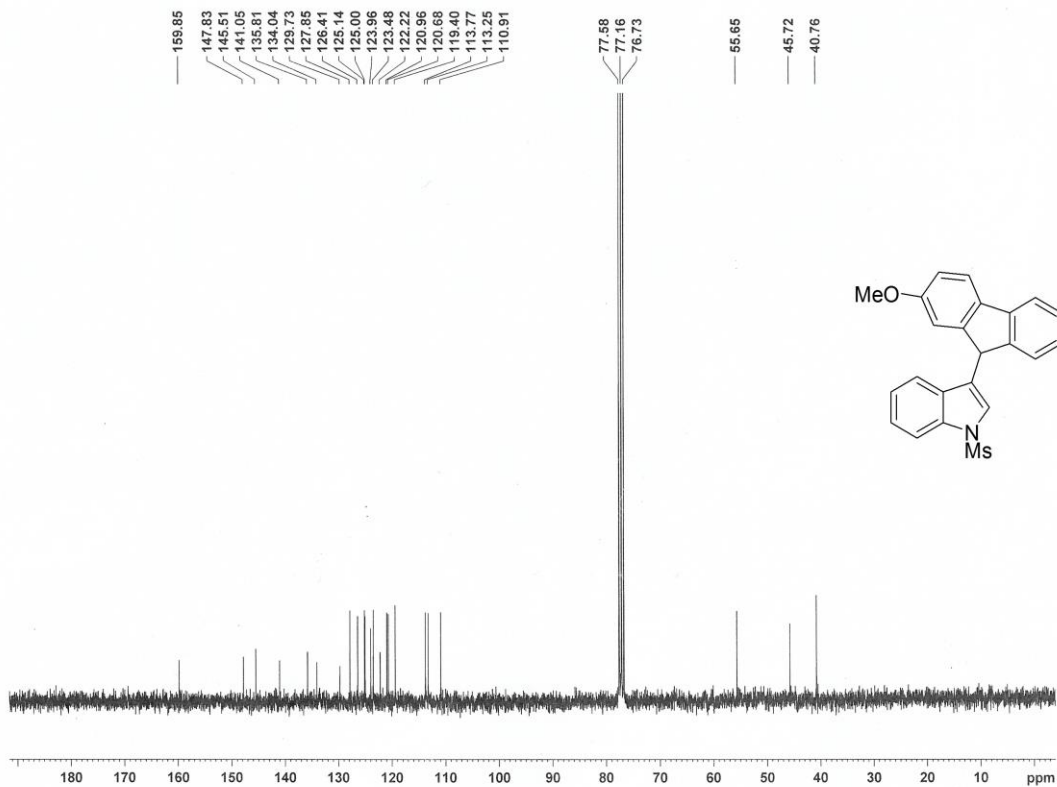

<sup>1</sup>H NMR of 3n, CDCl<sub>3</sub>, 300 MHz

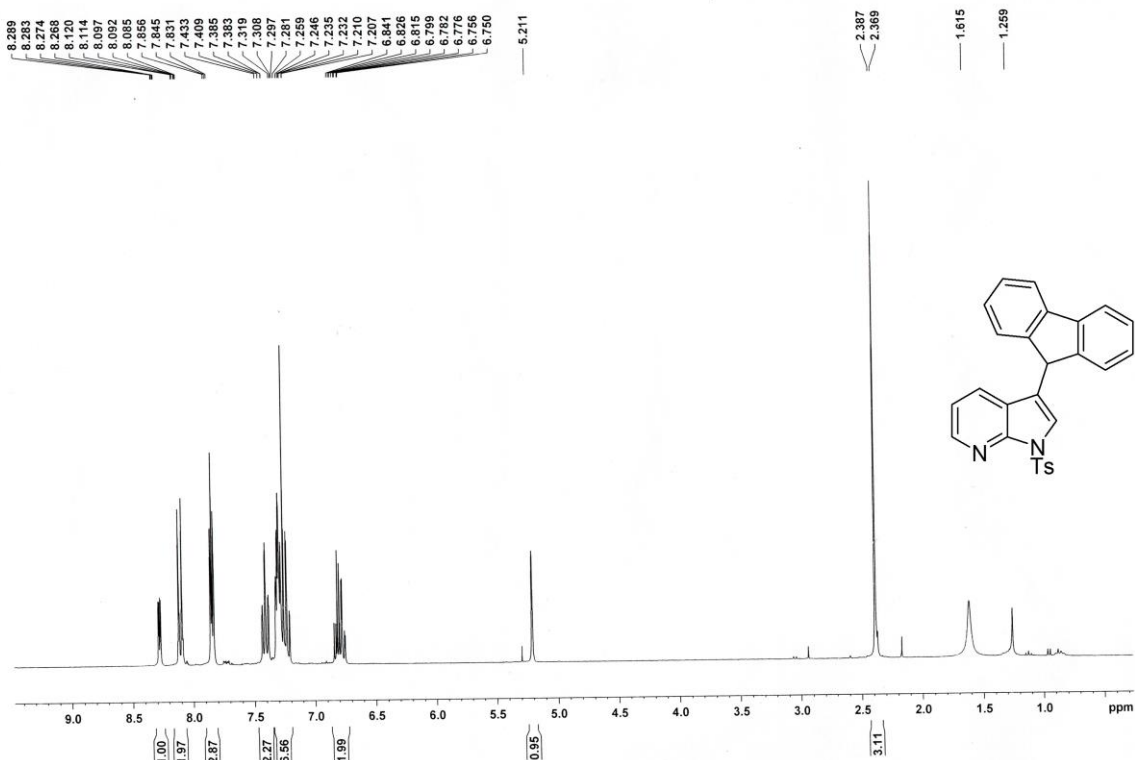

<sup>13</sup>C NMR of 3n, CDCl<sub>3</sub>, 100 MHz

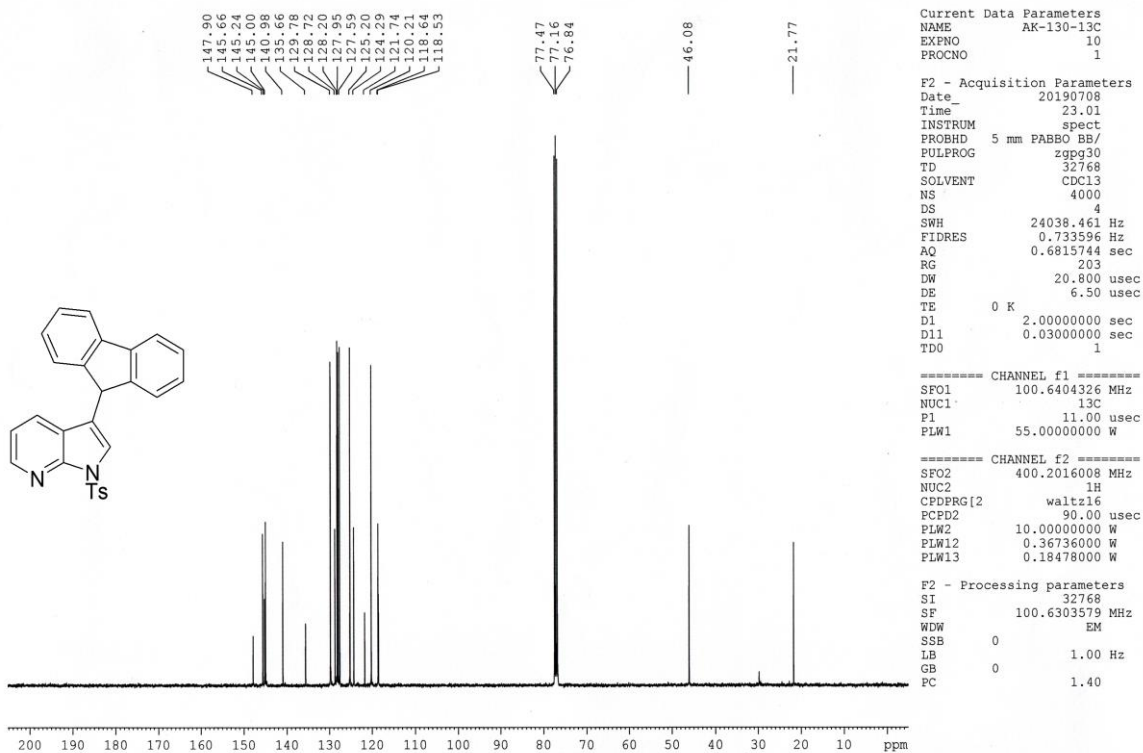

# <sup>1</sup>H NMR of 3o, CDCl<sub>3</sub>, 400 MHz

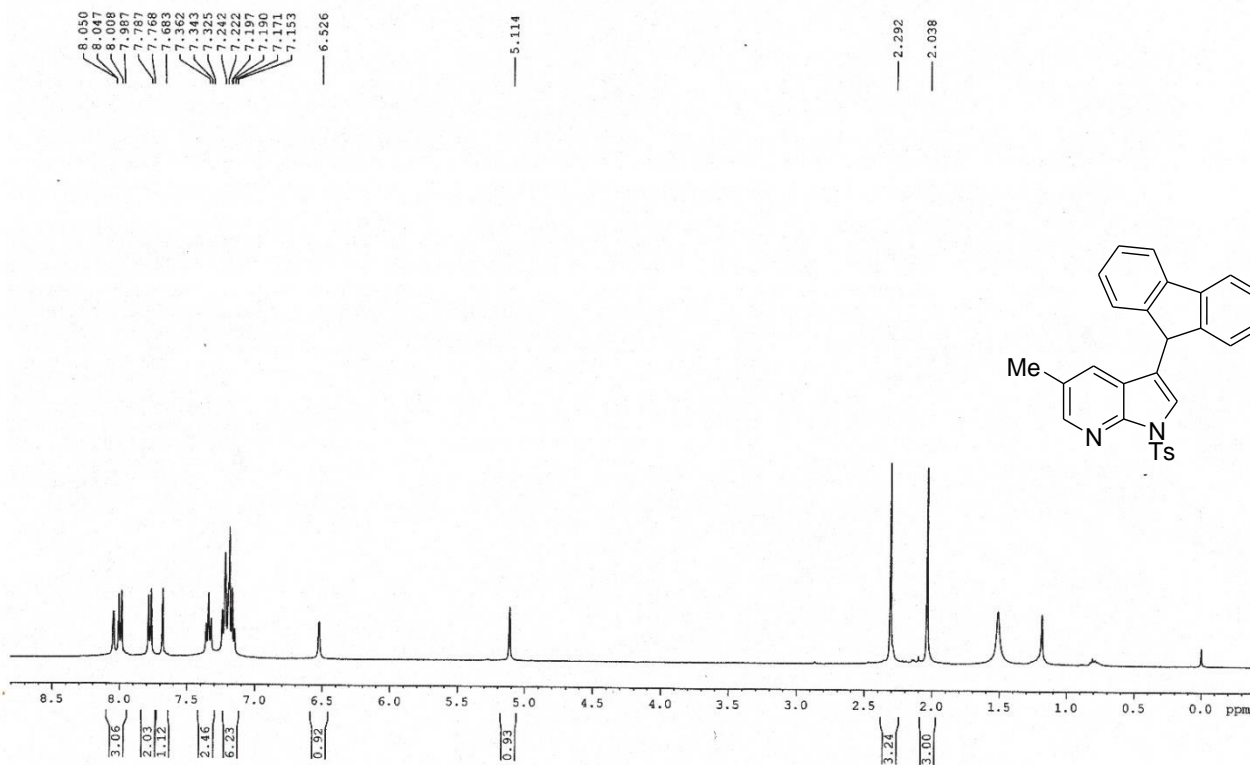

# <sup>13</sup>C NMR of 3o, CDCl<sub>3</sub>, 100 MHz

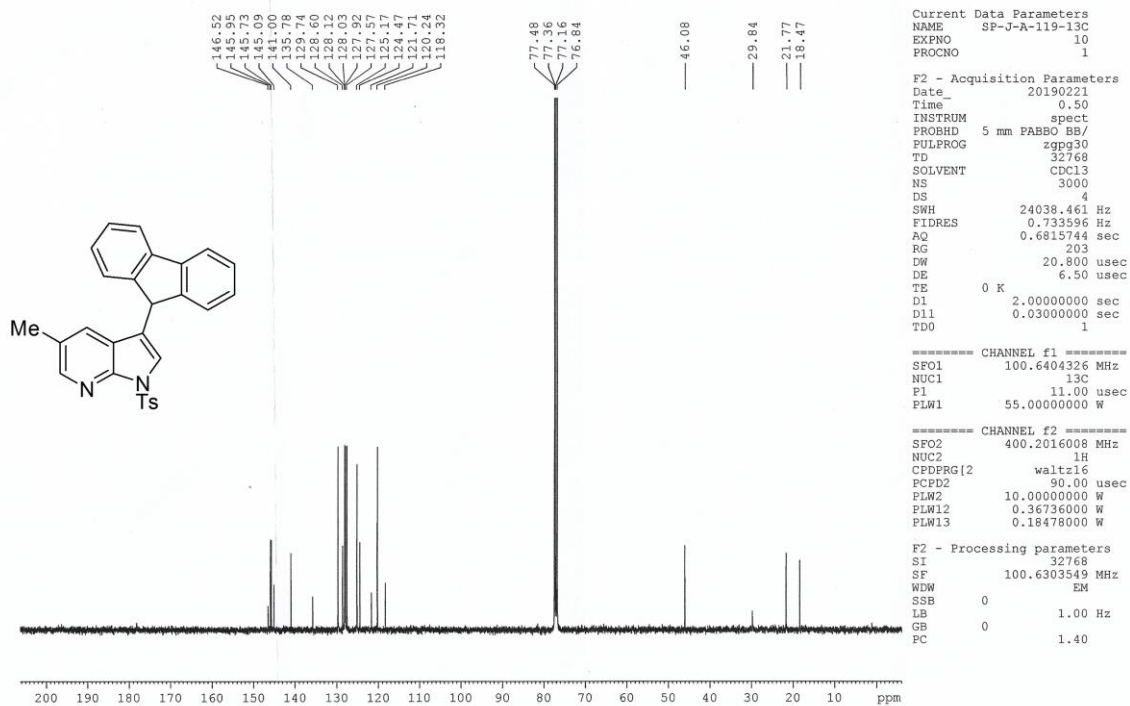

<sup>1</sup>H NMR of 3-Indolyl biphenyl ketone, CDCl<sub>3</sub>, 400 MHz

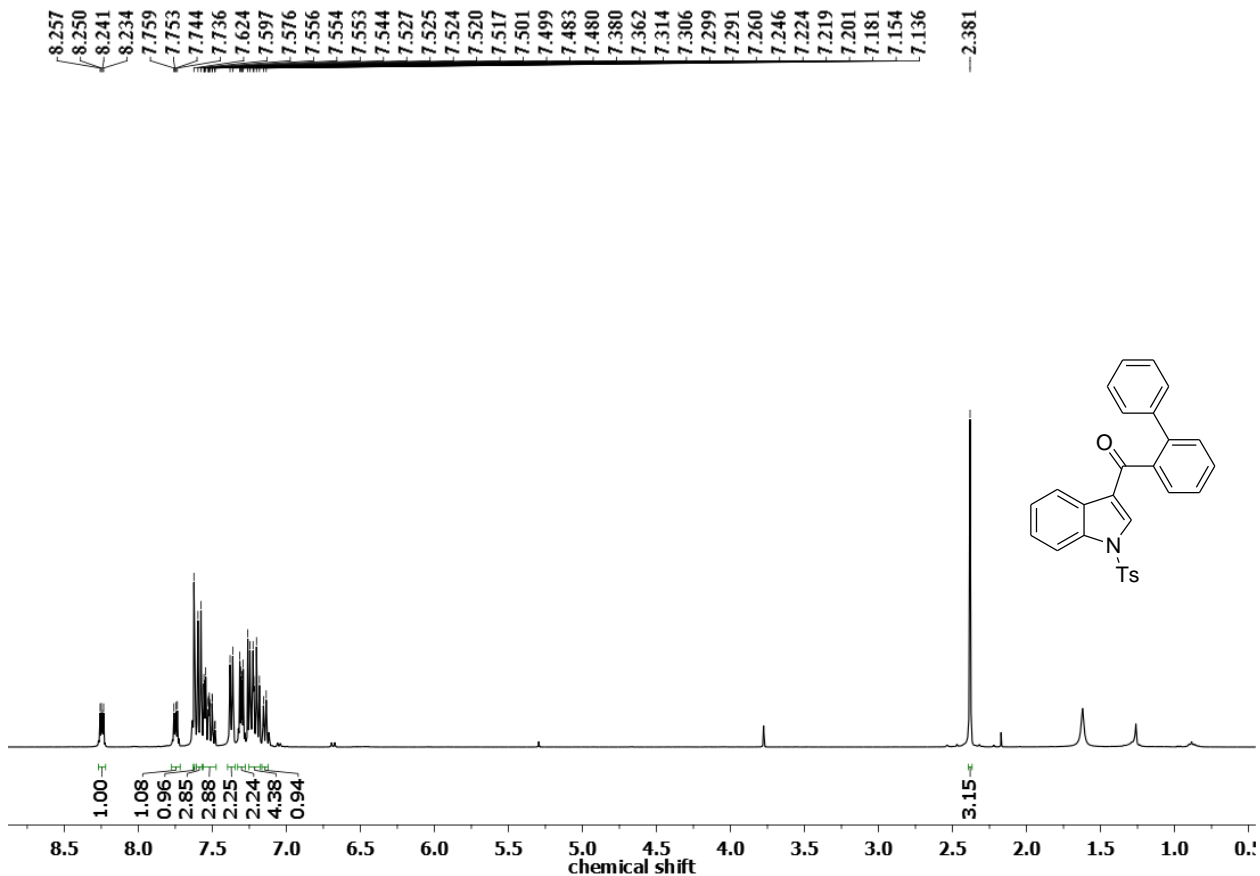

<sup>13</sup>C NMR of 3-Indolyl biphenyl ketone, CDCl<sub>3</sub>, 100 MHz

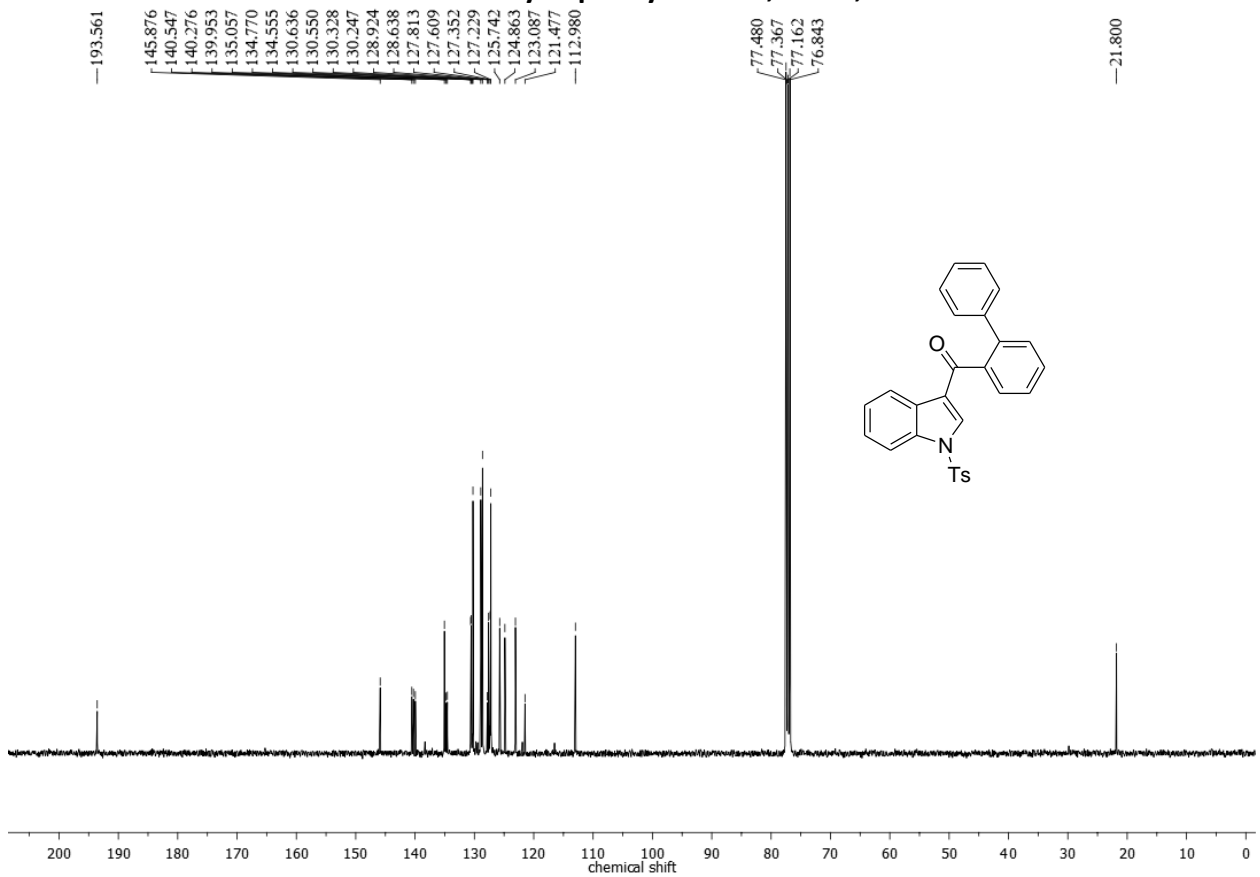

Supplement: d0ob00413h1.pdf [file d0ob00413h1.pdf]
